# Supplementary material for: Simulating sedimentary burial cycles – Part 2: Elemental-based multikinetic apatite fission-track interpretation and modelling techniques illustrated using examples from northern Yukon
Source: Copernicus journal article supplement (doi:10.5194/gchron-4-373-2022), 2022-06-15
Supplement: Supplementary file 1 [file gchron-4-373-2022-supplement.zip]

Archive with 3 entries (3 files):
- gchron-4-373-2022-supplement-title-page.pdf
- Supplement table S2.xlsx
- Supplement table S1.xlsx
