# Supplementary material for: Simulating sedimentary burial cycles – Part 2: Elemental-based multikinetic apatite fission-track interpretation and modelling techniques illustrated using examples from northern Yukon
Source: Copernicus journal article supplement (doi:10.5194/gchron-4-373-2022), 2022-06-15
Supplement: Supplementary file 1 [file gchron-4-373-2022-supplement.zip › gchron-4-373-2022-supplement-title-page.pdf]

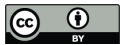

*Supplement of*

**Simulating sedimentary burial cycles – Part 2: Elemental-based multikinetetic apatite fission-track interpretation and modelling techniques illustrated using examples from northern Yukon**

**Dale R. Issler et al.**

*Correspondence to:* Dale R. Issler ([dale.issler@nrcan-rncan.gc.ca](mailto:dale.issler@nrcan-rncan.gc.ca))

- [gchron-4-373-2022-supplement-title-page.pdf](#)
- [Supplement table S1.xlsx](#)
- [Supplement table S2.xlsx](#)

The copyright of individual parts of the supplement might differ from the article licence.
