# Supplementary material for: Simulating sedimentary burial cycles – Part 2: Elemental-based multikinetic apatite fission-track interpretation and modelling techniques illustrated using examples from northern Yukon
Source: Copernicus journal article supplement (doi:10.5194/gchron-4-373-2022), 2022-06-15
Supplement: Supplementary file 1 [file gchron-4-373-2022-supplement.zip › Supplement table S2.xlsx]

## Sheet: Data Cl,eff Cl,Dpar, calc Dpar
Table S2. Cl, eCl (from multi-element rmr0; Carlson et al., 1999) and Dpar analyses for 52 Phanerozoic AFT samples from northern Canada
	Lab							Absolute	Absolute
No.	Sample	Sample No./		Meas.		Meas.		Difference	Difference	Meas.	Study	Stratigraphic Unit	Age	Elemental
	No.	Well Name	Grain	Cl	eCl	Dpar	eDpar	Cl - eCl	Dpar - eDpar	Type	Area			Analysis
			#	(apfu)	(apfu)	(mm)	(mm)	(apfu)	(mm)
1	1148-06	2009LHA003	1	0.0058	0.0167138	1.99847	1.80443	0.0109138	0.194042	age	N. Yukon	Imperial	Upper Devonian	EPMA
2	1148-06	2009LHA003	2	0.0759	0.199787	2.05838	2.40062	0.123887	0.342244	age	N. Yukon	Imperial	Upper Devonian	EPMA
3	1148-06	2009LHA003	3	0.0232	0.0467166	2.09831	1.90214	0.0235166	0.196176	age	N. Yukon	Imperial	Upper Devonian	EPMA
4	1148-06	2009LHA003	4	0.1263	0.271833	2.57754	2.63524	0.145533	0.0576973	age	N. Yukon	Imperial	Upper Devonian	EPMA
5	1148-06	2009LHA003	6	0.1158	0.115978	2.20814	2.12769	0.000177558	0.0804471	age	N. Yukon	Imperial	Upper Devonian	EPMA
6	1148-06	2009LHA003	7	0.0852	0.0518041	1.69895	1.9187	0.0333959	0.219752	age	N. Yukon	Imperial	Upper Devonian	EPMA
7	1148-06	2009LHA003	8	0.2325	0.404922	2.18817	3.06866	0.172422	0.880488	age	N. Yukon	Imperial	Upper Devonian	EPMA
8	1148-06	2009LHA003	9	0.0751	0.124051	2.21812	2.15398	0.0489513	0.0641385	age	N. Yukon	Imperial	Upper Devonian	EPMA
9	1148-06	2009LHA003	10	0.2277	0.226882	2.09831	2.48886	0.000817779	0.390546	age	N. Yukon	Imperial	Upper Devonian	EPMA
10	1148-06	2009LHA003	11	0.0267	0.0979583	2.3579	2.06901	0.0712583	0.288888	age	N. Yukon	Imperial	Upper Devonian	EPMA
11	1148-06	2009LHA003	12	0.1873	0.171465	1.73889	2.30839	0.0158354	0.569498	age	N. Yukon	Imperial	Upper Devonian	EPMA
12	1148-06	2009LHA003	13	0.0054	0.0533994	2.03841	1.9239	0.0479994	0.114509	age	N. Yukon	Imperial	Upper Devonian	EPMA
13	1148-06	2009LHA003	14	0.0093	0.00598278	1.96852	1.76948	0.00331722	0.199037	age	N. Yukon	Imperial	Upper Devonian	EPMA
14	1148-06	2009LHA003	15	0.0814	0.18453	2.17818	2.35093	0.10313	0.17275	age	N. Yukon	Imperial	Upper Devonian	EPMA
15	1148-06	2009LHA003	16	0.175	0.293447	2.40782	2.70563	0.118447	0.297813	age	N. Yukon	Imperial	Upper Devonian	EPMA
16	1148-06	2009LHA003	17	0.0028	-0.00289973	1.95854	1.74056	0.00569973	0.217979	age	N. Yukon	Imperial	Upper Devonian	EPMA
17	1148-06	2009LHA003	18	0	0.0260841	1.79879	1.83494	0.0260841	0.0361528	age	N. Yukon	Imperial	Upper Devonian	EPMA
18	1148-06	2009LHA003	19	0.0539	0.126333	1.79879	2.16141	0.0724331	0.36262	age	N. Yukon	Imperial	Upper Devonian	EPMA
19	1148-06	2009LHA003	20	0.2664	0.196657	2.1083	2.39043	0.0697433	0.28213	age	N. Yukon	Imperial	Upper Devonian	EPMA
20	1148-06	2009LHA003	21	0.3381	0.191526	2.29799	2.37372	0.146574	0.0757248	age	N. Yukon	Imperial	Upper Devonian	EPMA
21	1148-06	2009LHA003	22	0.2065	0.163112	2.24807	2.28119	0.0433877	0.0331144	age	N. Yukon	Imperial	Upper Devonian	EPMA
22	1148-06	2009LHA003	23	0.1547	0.35252	2.61748	2.89801	0.19782	0.280527	age	N. Yukon	Imperial	Upper Devonian	EPMA
23	1148-06	2009LHA003	24	0.0127	0.0723915	1.9186	1.98575	0.0596915	0.0671479	age	N. Yukon	Imperial	Upper Devonian	EPMA
24	1148-06	2009LHA003	25	0.2109	0.341077	2.4777	2.86074	0.130177	0.383035	age	N. Yukon	Imperial	Upper Devonian	EPMA
25	1148-06	2009LHA003	26	0.004	0.0502034	2.37786	1.91349	0.0462034	0.464373	age	N. Yukon	Imperial	Upper Devonian	EPMA
26	1148-06	2009LHA003	27	0.1282	0.225591	2.28801	2.48465	0.0973913	0.196645	age	N. Yukon	Imperial	Upper Devonian	EPMA
27	1148-06	2009LHA003	28	0.0696	0.0602512	2.04839	1.94621	0.00934881	0.10218	age	N. Yukon	Imperial	Upper Devonian	EPMA
28	1148-06	2009LHA003	29	0.1958	0.227802	2.2281	2.49185	0.0320022	0.263749	age	N. Yukon	Imperial	Upper Devonian	EPMA
29	1148-06	2009LHA003	30	0.0452	0.108001	2.20814	2.10171	0.0628008	0.106424	age	N. Yukon	Imperial	Upper Devonian	EPMA
30	1148-06	2009LHA003	31	0.0657	0.11621	2.6075	2.12845	0.0505102	0.47905	age	N. Yukon	Imperial	Upper Devonian	EPMA
31	1148-06	2009LHA003	32	0.0008	0.0729013	2.14823	1.98741	0.0721013	0.160824	age	N. Yukon	Imperial	Upper Devonian	EPMA
32	1148-06	2009LHA003	33	0.0277	0.204444	2.18817	2.41579	0.176744	0.227617	age	N. Yukon	Imperial	Upper Devonian	EPMA
33	1148-06	2009LHA003	34	0.057	0.12747	2.32794	2.16511	0.0704698	0.16283	age	N. Yukon	Imperial	Upper Devonian	EPMA
34	1148-06	2009LHA003	35	0.1119	0.286676	2.6075	2.68358	0.174776	0.0760827	age	N. Yukon	Imperial	Upper Devonian	EPMA
35	1148-06	2009LHA003	36	0.0207	0.0249582	2.23809	1.83128	0.00425815	0.40681	age	N. Yukon	Imperial	Upper Devonian	EPMA
36	1148-06	2009LHA003	37	0.0275	0.195674	2.06836	2.38723	0.168174	0.318867	age	N. Yukon	Imperial	Upper Devonian	EPMA
37	1148-06	2009LHA003	38	0.471	0.540318	2.90702	3.50958	0.069318	0.602567	age	N. Yukon	Imperial	Upper Devonian	EPMA
38	1148-06	2009LHA003	39	0.0726	0.123594	2.4178	2.15249	0.0509936	0.265309	age	N. Yukon	Imperial	Upper Devonian	EPMA
39	1148-06	2009LHA003	40	0.0285	0.0363749	2.06836	1.86846	0.00787492	0.199903	age	N. Yukon	Imperial	Upper Devonian	EPMA
40	1148-06	2009LHA003	1	0.1736	0.194295	2.75726	2.38274	0.0206955	0.374519	length	N. Yukon	Imperial	Upper Devonian	EPMA
41	1148-06	2009LHA003	2	0.055	0.0759485	2.14823	1.99733	0.0209485	0.1509	length	N. Yukon	Imperial	Upper Devonian	EPMA
42	1148-06	2009LHA003	3	0.0699	0.176201	3.09671	2.32381	0.106301	0.7729	length	N. Yukon	Imperial	Upper Devonian	EPMA
43	1148-06	2009LHA003	4	0.1041	0.114346	1.92858	2.12238	0.0102462	0.193792	length	N. Yukon	Imperial	Upper Devonian	EPMA
44	1148-06	2009LHA003	5	0.0386	0.167098	2.28801	2.29417	0.128498	0.00615801	length	N. Yukon	Imperial	Upper Devonian	EPMA
45	1148-06	2009LHA003	6	0.1292	0.277163	2.6674	2.6526	0.147963	0.0147984	length	N. Yukon	Imperial	Upper Devonian	EPMA
46	1148-06	2009LHA003	7	0.6515	0.694116	3.89543	4.01043	0.0426155	0.115003	length	N. Yukon	Imperial	Upper Devonian	EPMA
47	1148-06	2009LHA003	8	0.0099	0.100128	2.83713	2.07607	0.0902282	0.761054	length	N. Yukon	Imperial	Upper Devonian	EPMA
48	1148-06	2009LHA003	9	0.0675	0.094076	2.48769	2.05636	0.026576	0.431323	length	N. Yukon	Imperial	Upper Devonian	EPMA
49	1148-06	2009LHA003	10	0	0.0294462	1.84871	1.84589	0.0294462	0.0028184	length	N. Yukon	Imperial	Upper Devonian	EPMA
50	1148-06	2009LHA003	11	0.0293	0.114346	2.30798	2.12238	0.0850462	0.1856	length	N. Yukon	Imperial	Upper Devonian	EPMA
51	1148-06	2009LHA003	12	0.0021	0.0693212	1.87866	1.97575	0.0672212	0.0970854	length	N. Yukon	Imperial	Upper Devonian	EPMA
52	1148-06	2009LHA003	13	0.0038	0.0488653	1.83873	1.90913	0.0450653	0.0704053	length	N. Yukon	Imperial	Upper Devonian	EPMA
53	1148-06	2009LHA003	14	0.0195	0.043746	2.1682	1.89246	0.024246	0.275738	length	N. Yukon	Imperial	Upper Devonian	EPMA
54	1148-06	2009LHA003	15	0.2041	0.364384	3.14663	2.93664	0.160284	0.209989	length	N. Yukon	Imperial	Upper Devonian	EPMA
55	1148-06	2009LHA003	16	0.0061	0.038297	1.96852	1.87472	0.032197	0.0938033	length	N. Yukon	Imperial	Upper Devonian	EPMA
56	1148-06	2009LHA003	17	0.0791	0.174148	2.36788	2.31712	0.0950478	0.0507558	length	N. Yukon	Imperial	Upper Devonian	EPMA
57	1148-06	2009LHA003	18	0.1817	0.28309	3.1067	2.6719	0.10139	0.434794	length	N. Yukon	Imperial	Upper Devonian	EPMA
58	1148-06	2009LHA003	19	0.1734	0.196853	2.50766	2.39107	0.0234529	0.116591	length	N. Yukon	Imperial	Upper Devonian	EPMA
59	1148-06	2009LHA003	20	0.0043	0.0472547	1.79879	1.90389	0.0429547	0.105096	length	N. Yukon	Imperial	Upper Devonian	EPMA
60	1148-06	2009LHA003	21	0.1397	0.321117	1.62906	2.79574	0.181417	1.16667	length	N. Yukon	Imperial	Upper Devonian	EPMA
61	1148-06	2009LHA003	22	0.2211	0.167098	1.96852	2.29417	0.054002	0.325646	length	N. Yukon	Imperial	Upper Devonian	EPMA
62	1148-06	2009LHA003	23	0.0064	0.0243941	1.69895	1.82944	0.0179941	0.130489	length	N. Yukon	Imperial	Upper Devonian	EPMA
63	1148-06	2009LHA003	24	0.0238	0.0480607	2.17818	1.90651	0.0242607	0.271671	length	N. Yukon	Imperial	Upper Devonian	EPMA
64	1148-06	2009LHA003	25	0	0.150518	2.42778	2.24017	0.150518	0.187612	length	N. Yukon	Imperial	Upper Devonian	EPMA
65	1148-06	2009LHA003	26	0	-0.0174669	2.07834	1.69312	0.0174669	0.385226	length	N. Yukon	Imperial	Upper Devonian	EPMA
66	1148-06	2009LHA003	27	0.0413	0.178858	2.3579	2.33246	0.137558	0.0254325	length	N. Yukon	Imperial	Upper Devonian	EPMA
67	1148-06	2009LHA003	28	0.0056	0.017287	2.17818	1.8063	0.011687	0.371888	length	N. Yukon	Imperial	Upper Devonian	EPMA
68	1148-06	2009LHA003	29	0.2145	0.302798	2.48769	2.73608	0.088298	0.248394	length	N. Yukon	Imperial	Upper Devonian	EPMA
69	1148-06	2009LHA003	30	0.0786	0.0670054	1.87866	1.96821	0.0115946	0.0895438	length	N. Yukon	Imperial	Upper Devonian	EPMA
70	1148-06	2009LHA003	31	0.052	0.0654553	1.92858	1.96316	0.0134553	0.0345756	length	N. Yukon	Imperial	Upper Devonian	EPMA
71	1148-06	2009LHA003	32	0.0416	0.0407568	2.18817	1.88273	0.000843205	0.305441	length	N. Yukon	Imperial	Upper Devonian	EPMA
72	1148-06	2009LHA003	33	0.0456	0.109418	2.3579	2.10633	0.0638182	0.251568	length	N. Yukon	Imperial	Upper Devonian	EPMA
73	1148-06	2009LHA003	34	0.0868	0.163112	2.48769	2.28119	0.0763123	0.206502	length	N. Yukon	Imperial	Upper Devonian	EPMA
74	1148-06	2009LHA003	35	0.0127	0.106342	1.88865	2.09631	0.0936417	0.207661	length	N. Yukon	Imperial	Upper Devonian	EPMA
75	1148-06	2009LHA003	36	0.0127	0.148567	1.87866	2.23382	0.135867	0.355155	length	N. Yukon	Imperial	Upper Devonian	EPMA
76	1148-06	2009LHA003	37	0.0316	0.0229812	2.21812	1.82484	0.0086188	0.39328	length	N. Yukon	Imperial	Upper Devonian	EPMA
77	1148-06	2009LHA003	38	0	0.0369249	1.61908	1.87025	0.0369249	0.251168	length	N. Yukon	Imperial	Upper Devonian	EPMA
78	1148-06	2009LHA003	39	0.0017	0.101329	2.00846	2.07999	0.0996294	0.0715303	length	N. Yukon	Imperial	Upper Devonian	EPMA
79	1148-06	2009LHA003	40	0.0498	0.120377	3.14663	2.14202	0.0705775	1.00461	length	N. Yukon	Imperial	Upper Devonian	EPMA
80	1148-06	2009LHA003	41	0.0101	-0.00680105	1.68897	1.72785	0.0169011	0.0388839	length	N. Yukon	Imperial	Upper Devonian	EPMA
81	1148-06	2009LHA003	42	0.2489	0.273839	2.49767	2.64177	0.0249386	0.144102	length	N. Yukon	Imperial	Upper Devonian	EPMA
82	1148-06	2009LHA003	43	0.0422	0.0916333	2.69735	2.04841	0.0494333	0.648942	length	N. Yukon	Imperial	Upper Devonian	EPMA
83	1148-06	2009LHA003	44	0.0722	0.100849	2.13825	2.07842	0.0286493	0.0598253	length	N. Yukon	Imperial	Upper Devonian	EPMA
84	1148-06	2009LHA003	45	0.4584	0.516814	3.71572	3.43304	0.0584143	0.282679	length	N. Yukon	Imperial	Upper Devonian	EPMA
85	1148-06	2009LHA003	46	0.0558	0.158455	2.45774	2.26602	0.102655	0.191716	length	N. Yukon	Imperial	Upper Devonian	EPMA
86	1148-06	2009LHA003	47	0.0248	0.161001	3.8555	2.27431	0.136201	1.58119	length	N. Yukon	Imperial	Upper Devonian	EPMA
87	1148-06	2009LHA003	48	0.0871	0.115279	2.11828	2.12541	0.0281791	0.00713429	length	N. Yukon	Imperial	Upper Devonian	EPMA
88	1148-06	2009LHA003	49	0.0814	0.0380229	2.12826	1.87382	0.0433771	0.25444	length	N. Yukon	Imperial	Upper Devonian	EPMA
89	1148-06	2009LHA003	50	0.1149	0.145079	3.32634	2.22246	0.0301789	1.10388	length	N. Yukon	Imperial	Upper Devonian	EPMA
90	1148-06	2009LHA003	51	0.0695	0.141785	2.08833	2.21173	0.0722852	0.123405	length	N. Yukon	Imperial	Upper Devonian	EPMA
91	1148-06	2009LHA003	52	0.2546	0.399576	4.1051	3.05125	0.144976	1.05385	length	N. Yukon	Imperial	Upper Devonian	EPMA
92	1237-02	2009LHA006	1	0.130436	0.024566	2.34791	1.83	0.10587	0.517911	age	N. Yukon	Imperial	Upper Devonian	ICPMS
93	1237-02	2009LHA006	2	0.0999733	0.00433876	2.48769	1.76413	0.0956346	0.723559	age	N. Yukon	Imperial	Upper Devonian	ICPMS
94	1237-02	2009LHA006	3	0.112174	0.0357252	2.31796	1.86634	0.0764488	0.451619	age	N. Yukon	Imperial	Upper Devonian	ICPMS
95	1237-02	2009LHA006	3	0.112174	0.221342	2.31796	2.47082	0.109168	0.152857	age	N. Yukon	Imperial	Upper Devonian	ICPMS
96	1237-02	2009LHA006	4	0.0174906	-0.0577461	2.2281	1.56195	0.0752367	0.666158	age	N. Yukon	Imperial	Upper Devonian	ICPMS
97	1237-02	2009LHA006	5	0.272846	0.138705	2.55758	2.2017	0.134141	0.355873	age	N. Yukon	Imperial	Upper Devonian	ICPMS
98	1237-02	2009LHA006	6	0.0383912	-0.0388185	2.09831	1.62358	0.0772097	0.474727	age	N. Yukon	Imperial	Upper Devonian	ICPMS
99	1237-02	2009LHA006	7	0.0599278	0.118257	2.31796	2.13511	0.0583292	0.182848	age	N. Yukon	Imperial	Upper Devonian	ICPMS
100	1237-02	2009LHA006	8	0.0886351	-0.0120891	2.18817	1.71063	0.100724	0.477537	age	N. Yukon	Imperial	Upper Devonian	ICPMS
101	1237-02	2009LHA006	9	0	-0.0376124	3.19	1.62751	0.0376124	1.56249	age	N. Yukon	Imperial	Upper Devonian	ICPMS
102	1237-02	2009LHA006	10	0.229335	0.211806	3.24647	2.43976	0.0175296	0.806712	age	N. Yukon	Imperial	Upper Devonian	ICPMS
103	1237-02	2009LHA006	11	0.0924496	0.0124311	2.13825	1.79048	0.0800185	0.347765	age	N. Yukon	Imperial	Upper Devonian	ICPMS
104	1237-02	2009LHA006	12	0.036945	0.0329445	2.02842	1.85729	0.00400041	0.171138	age	N. Yukon	Imperial	Upper Devonian	ICPMS
105	1237-02	2009LHA006	13	0.119167	0.143288	2.31796	2.21663	0.0241217	0.101331	age	N. Yukon	Imperial	Upper Devonian	ICPMS
106	1237-02	2009LHA006	15	0.0123763	-0.0499676	2.02842	1.58728	0.0623439	0.441147	age	N. Yukon	Imperial	Upper Devonian	ICPMS
107	1237-02	2009LHA006	16	0.390522	0.178406	3.37626	2.33099	0.212116	1.04527	age	N. Yukon	Imperial	Upper Devonian	ICPMS
108	1237-02	2009LHA006	17	0.0302967	0.160271	2.25806	2.27193	0.129975	0.0138785	age	N. Yukon	Imperial	Upper Devonian	ICPMS
109	1237-02	2009LHA006	18	0.0165624	-0.0476866	2.17818	1.59471	0.0642491	0.583479	age	N. Yukon	Imperial	Upper Devonian	ICPMS
110	1237-02	2009LHA006	19	0.100863	0.0345558	2.06836	1.86253	0.066307	0.205827	age	N. Yukon	Imperial	Upper Devonian	ICPMS
111	1237-02	2009LHA006	20	0.846677	0.490142	2.74727	3.34618	0.356535	0.59891	age	N. Yukon	Imperial	Upper Devonian	ICPMS
112	1237-02	2009LHA006	21	0	-0.0434359	1.46	1.60855	0.0434359	0.148548	age	N. Yukon	Imperial	Upper Devonian	ICPMS
113	1237-02	2009LHA006	22	0.178153	0.075116	2.45774	1.99462	0.103037	0.463115	age	N. Yukon	Imperial	Upper Devonian	ICPMS
114	1237-02	2009LHA006	23	0.151706	0.109709	2.76724	2.10727	0.0419971	0.659966	age	N. Yukon	Imperial	Upper Devonian	ICPMS
115	1237-02	2009LHA006	24	0.197001	0.224794	2.61748	2.48206	0.0277924	0.135424	age	N. Yukon	Imperial	Upper Devonian	ICPMS
116	1237-02	2009LHA006	25	0.124482	0.291916	2.04839	2.70064	0.167433	0.652252	age	N. Yukon	Imperial	Upper Devonian	ICPMS
117	1237-02	2009LHA006	26	0.0237542	-0.0138285	2.1682	1.70497	0.0375827	0.463234	age	N. Yukon	Imperial	Upper Devonian	ICPMS
118	1237-02	2009LHA006	27	0	0.0211704	2.31796	1.81894	0.0211704	0.499017	age	N. Yukon	Imperial	Upper Devonian	ICPMS
119	1237-02	2009LHA006	28	0.00474052	0.000664054	2.20814	1.75216	0.00407646	0.455973	age	N. Yukon	Imperial	Upper Devonian	ICPMS
120	1237-02	2009LHA006	29	0.166003	0.150537	2.52762	2.24023	0.015467	0.287391	age	N. Yukon	Imperial	Upper Devonian	ICPMS
121	1237-02	2009LHA006	30	0.0727176	-0.029009	2.18	1.65553	0.101727	0.52447	age	N. Yukon	Imperial	Upper Devonian	ICPMS
122	1237-02	2009LHA006	31	0.0133123	-0.0110253	1.9785	1.7141	0.0243375	0.264409	age	N. Yukon	Imperial	Upper Devonian	ICPMS
123	1237-02	2009LHA006	32	0.104157	0.0414389	2.17818	1.88495	0.0627183	0.293235	age	N. Yukon	Imperial	Upper Devonian	ICPMS
124	1237-02	2009LHA006	33	0.103597	0.0583148	2.67738	1.93991	0.0452823	0.737478	age	N. Yukon	Imperial	Upper Devonian	ICPMS
125	1237-02	2009LHA006	34	0.167276	0.152409	2.73729	2.24633	0.0148676	0.490958	age	N. Yukon	Imperial	Upper Devonian	ICPMS
126	1237-02	2009LHA006	35	0.206827	0.065321	2.40782	1.96272	0.141506	0.445094	age	N. Yukon	Imperial	Upper Devonian	ICPMS
127	1237-02	2009LHA006	37	0.0865724	0.113396	2.1083	2.11928	0.0268236	0.010986	age	N. Yukon	Imperial	Upper Devonian	ICPMS
128	1237-02	2009LHA006	38	0.0609439	0.122098	2.52762	2.14762	0.0611537	0.380005	age	N. Yukon	Imperial	Upper Devonian	ICPMS
129	1237-02	2009LHA006	39	0.0207136	-0.0308653	2.19815	1.64949	0.0515789	0.548667	age	N. Yukon	Imperial	Upper Devonian	ICPMS
130	1237-02	2009LHA006	40	0.0471666	-0.0212513	2.61748	1.68079	0.0684179	0.936686	age	N. Yukon	Imperial	Upper Devonian	ICPMS
131	1237-02	2009LHA006	2	0.00166278	0.0479989	2.03841	1.90631	0.0463362	0.132096	length	N. Yukon	Imperial	Upper Devonian	ICPMS
132	1237-02	2009LHA006	3	0.0259808	-0.054122	2.27802	1.57375	0.0801028	0.704276	length	N. Yukon	Imperial	Upper Devonian	ICPMS
133	1237-02	2009LHA006	4	0.0978509	0.00550794	2.30798	1.76794	0.0923429	0.540039	length	N. Yukon	Imperial	Upper Devonian	ICPMS
134	1237-02	2009LHA006	5	0.0474483	0.0315546	2.75726	1.85276	0.0158937	0.904496	length	N. Yukon	Imperial	Upper Devonian	ICPMS
135	1237-02	2009LHA006	6	0.0210017	0.0448635	1.98849	1.8961	0.0238618	0.0923869	length	N. Yukon	Imperial	Upper Devonian	ICPMS
136	1237-02	2009LHA006	7	0.0666326	0.101793	2.19815	2.0815	0.0351606	0.116655	length	N. Yukon	Imperial	Upper Devonian	ICPMS
137	1237-02	2009LHA006	8	0.0401423	-0.0166407	2.14823	1.69581	0.056783	0.452424	length	N. Yukon	Imperial	Upper Devonian	ICPMS
138	1237-02	2009LHA006	9	0.0387404	0.0247876	2.65742	1.83072	0.0139528	0.826693	length	N. Yukon	Imperial	Upper Devonian	ICPMS
139	1237-02	2009LHA006	10	0.0653086	-0.0305835	2.19815	1.6504	0.0958922	0.547749	length	N. Yukon	Imperial	Upper Devonian	ICPMS
140	1237-02	2009LHA006	11	0.150439	0.328289	2.36788	2.8191	0.17785	0.451216	length	N. Yukon	Imperial	Upper Devonian	ICPMS
141	1237-02	2009LHA006	12	0.0192373	0.00693515	2.11828	1.77258	0.0123022	0.345695	length	N. Yukon	Imperial	Upper Devonian	ICPMS
142	1237-02	2009LHA006	13	0.0371964	0.12016	2.27802	2.14131	0.0829636	0.136715	length	N. Yukon	Imperial	Upper Devonian	ICPMS
143	1237-02	2009LHA006	14	0.164443	0.115678	3.70574	2.12671	0.0487649	1.57902	length	N. Yukon	Imperial	Upper Devonian	ICPMS
144	1237-02	2009LHA006	15	0.0593448	-0.0209588	2.32794	1.68175	0.0803036	0.646198	length	N. Yukon	Imperial	Upper Devonian	ICPMS
145	1237-02	2009LHA006	16	0.0402618	-0.034166	2.26804	1.63874	0.0744279	0.629304	length	N. Yukon	Imperial	Upper Devonian	ICPMS
146	1237-02	2009LHA006	17	0.0945299	0.0860025	2.43777	2.03007	0.0085274	0.407695	length	N. Yukon	Imperial	Upper Devonian	ICPMS
147	1237-02	2009LHA006	18	0.0421407	0.0658128	2.32794	1.96432	0.0236721	0.36362	length	N. Yukon	Imperial	Upper Devonian	ICPMS
148	1237-02	2009LHA006	19	0.0280192	-0.0510841	2.19815	1.58364	0.0791033	0.614511	length	N. Yukon	Imperial	Upper Devonian	ICPMS
149	1237-02	2009LHA006	20	0.105075	0.106315	2.46772	2.09622	0.00124011	0.371498	length	N. Yukon	Imperial	Upper Devonian	ICPMS
150	1237-02	2009LHA006	21	0.167508	0.14259	2.46772	2.21435	0.0249178	0.253366	length	N. Yukon	Imperial	Upper Devonian	ICPMS
151	1237-02	2009LHA006	22	0.0282263	0.0743603	3.96532	1.99216	0.046134	1.97316	length	N. Yukon	Imperial	Upper Devonian	ICPMS
152	1237-02	2009LHA006	23	0.00284357	-0.0239296	1.78881	1.67207	0.0267732	0.116736	length	N. Yukon	Imperial	Upper Devonian	ICPMS
153	1237-02	2009LHA006	24	0.505103	0.332316	3.29639	2.83221	0.172787	0.464183	length	N. Yukon	Imperial	Upper Devonian	ICPMS
154	1237-02	2009LHA006	25	0.156266	0.124175	3.06676	2.15438	0.0320908	0.912376	length	N. Yukon	Imperial	Upper Devonian	ICPMS
155	1237-02	2009LHA006	26	0.0473582	-0.0438909	2.65742	1.60707	0.091249	1.05035	length	N. Yukon	Imperial	Upper Devonian	ICPMS
156	1237-02	2009LHA006	27	0.0133806	-0.0055834	1.8587	1.73182	0.018964	0.126879	length	N. Yukon	Imperial	Upper Devonian	ICPMS
157	1237-02	2009LHA006	28	0.202601	0.146699	2.34791	2.22773	0.055902	0.120178	length	N. Yukon	Imperial	Upper Devonian	ICPMS
158	1237-02	2009LHA006	29	0.511512	0.249582	2.70734	2.56278	0.26193	0.144554	length	N. Yukon	Imperial	Upper Devonian	ICPMS
159	1237-02	2009LHA006	30	0.0830258	-0.00228833	2.34791	1.74255	0.0853141	0.605364	length	N. Yukon	Imperial	Upper Devonian	ICPMS
160	1237-02	2009LHA006	31	0.0422059	-0.0329039	2.14823	1.64285	0.0751098	0.505386	length	N. Yukon	Imperial	Upper Devonian	ICPMS
161	1237-02	2009LHA006	32	0.116583	0.036777	2.26804	1.86977	0.0798063	0.398273	length	N. Yukon	Imperial	Upper Devonian	ICPMS
162	1237-02	2009LHA006	33	0.15201	0.0654066	2.61748	1.963	0.0866034	0.654479	length	N. Yukon	Imperial	Upper Devonian	ICPMS
163	1237-02	2009LHA006	34	0.182151	0.174014	2.43777	2.31669	0.00813715	0.121081	length	N. Yukon	Imperial	Upper Devonian	ICPMS
164	1237-02	2009LHA006	35	0.283405	0.14396	3.05678	2.21882	0.139445	0.83796	length	N. Yukon	Imperial	Upper Devonian	ICPMS
165	1237-02	2009LHA006	36	0.0262959	0.105841	2.05838	2.09468	0.0795448	0.0363016	length	N. Yukon	Imperial	Upper Devonian	ICPMS
166	1237-02	2009LHA006	37	0.26674	0.12659	2.43777	2.16225	0.14015	0.27552	length	N. Yukon	Imperial	Upper Devonian	ICPMS
167	1237-02	2009LHA006	38	0.0204186	0.0578567	1.8587	1.93841	0.0374381	0.0797183	length	N. Yukon	Imperial	Upper Devonian	ICPMS
168	1237-02	2009LHA006	39	0.0606377	-0.0252392	2.05838	1.66781	0.0858769	0.390569	length	N. Yukon	Imperial	Upper Devonian	ICPMS
169	1237-02	2009LHA006	40	0.158433	0.111948	1.94855	2.11457	0.0464848	0.166014	length	N. Yukon	Imperial	Upper Devonian	ICPMS
170	1237-02	2009LHA006	41	0.0052025	-0.0712391	1.7289	1.518	0.0764416	0.210899	length	N. Yukon	Imperial	Upper Devonian	ICPMS
171	1237-02	2009LHA006	42	0.0489812	-0.0283268	2.31796	1.65775	0.077308	0.660208	length	N. Yukon	Imperial	Upper Devonian	ICPMS
172	1237-02	2009LHA006	43	0.0364408	0.0464521	2.06836	1.90127	0.0100113	0.167085	length	N. Yukon	Imperial	Upper Devonian	ICPMS
173	1237-02	2009LHA006	44	0.239482	0.231075	3.08673	2.50251	0.00840737	0.584218	length	N. Yukon	Imperial	Upper Devonian	ICPMS
174	1237-02	2009LHA006	45	0.217047	0.10849	2.48769	2.10331	0.108557	0.384381	length	N. Yukon	Imperial	Upper Devonian	ICPMS
175	1237-02	2009LHA006	46	0.0999048	0.169138	2.08833	2.30081	0.069233	0.212481	length	N. Yukon	Imperial	Upper Devonian	ICPMS
176	1237-02	2009LHA006	47	0.0417503	-0.0401197	2.18817	1.61935	0.08187	0.568821	length	N. Yukon	Imperial	Upper Devonian	ICPMS
177	1237-02	2009LHA006	48	0.00876719	-0.0553344	2.1083	1.5698	0.0641016	0.538496	length	N. Yukon	Imperial	Upper Devonian	ICPMS
178	1237-02	2009LHA006	49	0.205299	0.192228	2.9769	2.37601	0.0130704	0.600899	length	N. Yukon	Imperial	Upper Devonian	ICPMS
179	1237-07	2009LHA057	1	0.0962678	0.0964257	2.15822	2.06402	0.000157885	0.0941992	age	N. Yukon	Imperial	Upper Devonian	ICPMS
180	1237-07	2009LHA057	2	0.059802	0.0525543	2.08833	1.92115	0.0072477	0.167181	age	N. Yukon	Imperial	Upper Devonian	ICPMS
181	1237-07	2009LHA057	3	0.0350997	-0.0518602	1.98849	1.58111	0.0869599	0.407374	age	N. Yukon	Imperial	Upper Devonian	ICPMS
182	1237-07	2009LHA057	4	0.00582068	-0.0705638	1.87	1.5202	0.0763845	0.349796	age	N. Yukon	Imperial	Upper Devonian	ICPMS
183	1237-07	2009LHA057	5	0.0553608	0.0653142	2.01844	1.9627	0.00995347	0.0557397	age	N. Yukon	Imperial	Upper Devonian	ICPMS
184	1237-07	2009LHA057	6	0	-0.0657781	1.89863	1.53579	0.0657781	0.362843	age	N. Yukon	Imperial	Upper Devonian	ICPMS
185	1237-07	2009LHA057	7	0.0310163	0.0145883	2.1083	1.79751	0.0164279	0.310788	age	N. Yukon	Imperial	Upper Devonian	ICPMS
186	1237-07	2009LHA057	10	0.184823	0.169194	2.59751	2.30099	0.0156294	0.296522	age	N. Yukon	Imperial	Upper Devonian	ICPMS
187	1237-07	2009LHA057	11	0.0861837	-0.00469546	2.39783	1.73471	0.0908792	0.663123	age	N. Yukon	Imperial	Upper Devonian	ICPMS
188	1237-07	2009LHA057	12	0.182212	0.163408	2.917	2.28215	0.0188039	0.634851	age	N. Yukon	Imperial	Upper Devonian	ICPMS
189	1237-07	2009LHA057	13	0.12982	0.0096848	2.23809	1.78154	0.120135	0.456549	age	N. Yukon	Imperial	Upper Devonian	ICPMS
190	1237-07	2009LHA057	14	0.0401046	0.00763312	2.08833	1.77486	0.0324715	0.31347	age	N. Yukon	Imperial	Upper Devonian	ICPMS
191	1237-07	2009LHA057	15	0.00558451	-0.0224078	2.04839	1.67703	0.0279923	0.371364	age	N. Yukon	Imperial	Upper Devonian	ICPMS
192	1237-07	2009LHA057	17	0.0938733	0.0588575	2.19815	1.94167	0.0350158	0.256478	age	N. Yukon	Imperial	Upper Devonian	ICPMS
193	1237-07	2009LHA057	18	0.0529182	0.0278446	1.83873	1.84068	0.0250735	0.00194997	age	N. Yukon	Imperial	Upper Devonian	ICPMS
194	1237-07	2009LHA057	19	0.0271632	-0.0322978	2.07834	1.64482	0.059461	0.433524	age	N. Yukon	Imperial	Upper Devonian	ICPMS
195	1237-07	2009LHA057	21	0.0435131	-0.0184115	1.96852	1.69004	0.0619246	0.278478	age	N. Yukon	Imperial	Upper Devonian	ICPMS
196	1237-07	2009LHA057	22	0.0355633	0.0770095	2.24807	2.00079	0.0414461	0.247285	age	N. Yukon	Imperial	Upper Devonian	ICPMS
197	1237-07	2009LHA057	23	0.0871371	0.0933833	1.83873	2.05411	0.00624621	0.215381	age	N. Yukon	Imperial	Upper Devonian	ICPMS
198	1237-07	2009LHA057	24	0.029991	0.0537096	2.38785	1.92491	0.0237186	0.462939	age	N. Yukon	Imperial	Upper Devonian	ICPMS
199	1237-07	2009LHA057	25	0.0604571	-0.0206869	2.28801	1.68263	0.081144	0.605376	age	N. Yukon	Imperial	Upper Devonian	ICPMS
200	1237-07	2009LHA057	26	0.0679265	-0.0171973	2.12826	1.694	0.0851238	0.434268	age	N. Yukon	Imperial	Upper Devonian	ICPMS
201	1237-07	2009LHA057	27	0.0361079	-0.00739838	2.04839	1.72591	0.0435063	0.322485	age	N. Yukon	Imperial	Upper Devonian	ICPMS
202	1237-07	2009LHA057	28	0.0406891	-0.0461461	2.11828	1.59972	0.0868352	0.518558	age	N. Yukon	Imperial	Upper Devonian	ICPMS
203	1237-07	2009LHA057	29	0.0947803	0.0902476	2.93697	2.0439	0.00453263	0.89307	age	N. Yukon	Imperial	Upper Devonian	ICPMS
204	1237-07	2009LHA057	30	0	-0.0712533	2.05838	1.51796	0.0712533	0.540417	age	N. Yukon	Imperial	Upper Devonian	ICPMS
205	1237-07	2009LHA057	32	0.0264009	-0.0475018	2.6075	1.59531	0.0739026	1.01219	age	N. Yukon	Imperial	Upper Devonian	ICPMS
206	1237-07	2009LHA057	33	0.0865145	-0.0123933	2.19815	1.70964	0.0989078	0.488512	age	N. Yukon	Imperial	Upper Devonian	ICPMS
207	1237-07	2009LHA057	34	0.181895	0.149218	2.5	2.23594	0.0326773	0.264061	age	N. Yukon	Imperial	Upper Devonian	ICPMS
208	1237-07	2009LHA057	35	0.00669603	-0.0559697	2.11	1.56773	0.0626658	0.542269	age	N. Yukon	Imperial	Upper Devonian	ICPMS
209	1237-07	2009LHA057	36	0.00588636	-0.0696533	1.96852	1.52317	0.0755397	0.445351	age	N. Yukon	Imperial	Upper Devonian	ICPMS
210	1237-07	2009LHA057	37	0.261219	0.460285	2.70734	3.24895	0.199066	0.541615	age	N. Yukon	Imperial	Upper Devonian	ICPMS
211	1237-07	2009LHA057	39	0.0189199	-0.0468076	2.11828	1.59757	0.0657275	0.520712	age	N. Yukon	Imperial	Upper Devonian	ICPMS
212	1237-07	2009LHA057	40	0.0614492	-0.0268559	2.2281	1.66254	0.0883051	0.565562	age	N. Yukon	Imperial	Upper Devonian	ICPMS
213	1237-07	2009LHA057	1	0.0253214	-0.0048914	2.76724	1.73407	0.0302128	1.03317	length	N. Yukon	Imperial	Upper Devonian	ICPMS
214	1237-07	2009LHA057	2	0.00215464	-0.0527049	2.06836	1.57836	0.0548595	0.489997	length	N. Yukon	Imperial	Upper Devonian	ICPMS
215	1237-07	2009LHA057	3	0.128243	0.0493038	2.14823	1.91056	0.0789392	0.237671	length	N. Yukon	Imperial	Upper Devonian	ICPMS
216	1237-07	2009LHA057	5	0.0641425	0.131861	2.36788	2.17942	0.0677188	0.188465	length	N. Yukon	Imperial	Upper Devonian	ICPMS
217	1237-07	2009LHA057	6	0.00806987	-0.0609423	2.13825	1.55154	0.0690122	0.586711	length	N. Yukon	Imperial	Upper Devonian	ICPMS
218	1237-07	2009LHA057	7	0.123193	0.0219329	2.6075	1.82143	0.10126	0.78607	length	N. Yukon	Imperial	Upper Devonian	ICPMS
219	1237-07	2009LHA057	11	0.122399	0.0464007	2.33793	1.90111	0.0759984	0.436821	length	N. Yukon	Imperial	Upper Devonian	ICPMS
220	1237-07	2009LHA057	12	0.141531	0.0611773	2.14823	1.94923	0.0803533	0.199004	length	N. Yukon	Imperial	Upper Devonian	ICPMS
221	1237-07	2009LHA057	13	0.0971046	0.00482271	2.58753	1.76571	0.0922819	0.821823	length	N. Yukon	Imperial	Upper Devonian	ICPMS
222	1237-07	2009LHA057	14	0.0979139	0.123535	2.1682	2.1523	0.0256211	0.0158998	length	N. Yukon	Imperial	Upper Devonian	ICPMS
223	1237-07	2009LHA057	15	0.124112	0.0556168	2.38785	1.93112	0.0684956	0.456728	length	N. Yukon	Imperial	Upper Devonian	ICPMS
224	1237-07	2009LHA057	16	0.0148402	-0.0411281	1.95854	1.61606	0.0559683	0.342472	length	N. Yukon	Imperial	Upper Devonian	ICPMS
225	1237-07	2009LHA057	17	0.0216644	-0.0508493	1.86868	1.58441	0.0725137	0.284274	length	N. Yukon	Imperial	Upper Devonian	ICPMS
226	1237-07	2009LHA057	18	0.0112825	-0.0581771	1.86868	1.56054	0.0694596	0.308138	length	N. Yukon	Imperial	Upper Devonian	ICPMS
227	1237-07	2009LHA057	19	0.0455765	0.0267865	1.86868	1.83723	0.0187899	0.0314478	length	N. Yukon	Imperial	Upper Devonian	ICPMS
228	1237-07	2009LHA057	20	0.127968	0.122265	2.18817	2.14816	0.00570296	0.0400051	length	N. Yukon	Imperial	Upper Devonian	ICPMS
229	1237-07	2009LHA057	21	0.102375	0.0711162	2.36788	1.98159	0.0312591	0.386285	length	N. Yukon	Imperial	Upper Devonian	ICPMS
230	1237-07	2009LHA057	22	0.0621956	0.0190743	2.59751	1.81212	0.0431212	0.785395	length	N. Yukon	Imperial	Upper Devonian	ICPMS
231	1237-07	2009LHA057	23	0.0584558	0.0601648	2.73729	1.94593	0.00170899	0.791357	length	N. Yukon	Imperial	Upper Devonian	ICPMS
232	1237-07	2009LHA057	24	0.0654665	0.106284	2.38785	2.09612	0.040818	0.291725	length	N. Yukon	Imperial	Upper Devonian	ICPMS
233	1237-07	2009LHA057	25	0.289877	0.270072	2.70734	2.62951	0.0198046	0.0778278	length	N. Yukon	Imperial	Upper Devonian	ICPMS
234	1237-07	2009LHA057	26	0.18899	0.182782	2.45774	2.34524	0.0062083	0.112494	length	N. Yukon	Imperial	Upper Devonian	ICPMS
235	1237-07	2009LHA057	27	0	0.0339179	2.1083	1.86046	0.0339179	0.24784	length	N. Yukon	Imperial	Upper Devonian	ICPMS
236	1238-08	2009LHA072	1	0.0864	0.119455	2.12826	2.13901	0.0330546	0.010748	age	N. Yukon	Imperial	Upper Devonian	EPMA
237	1238-08	2009LHA072	4	0.0107	0.107527	3.19655	2.10017	0.0968273	1.09638	age	N. Yukon	Imperial	Upper Devonian	EPMA
238	1238-08	2009LHA072	5	0.1167	0.155681	2.68737	2.25699	0.0389814	0.430381	age	N. Yukon	Imperial	Upper Devonian	EPMA
239	1238-08	2009LHA072	6	0.0272	0.0410293	2.20814	1.88361	0.0138293	0.324521	age	N. Yukon	Imperial	Upper Devonian	EPMA
240	1238-08	2009LHA072	7	0.085	0.19469	2.917	2.38402	0.10969	0.532979	age	N. Yukon	Imperial	Upper Devonian	EPMA
241	1238-08	2009LHA072	8	0.0206	0.0313965	2.07834	1.85224	0.0107965	0.226099	age	N. Yukon	Imperial	Upper Devonian	EPMA
242	1238-08	2009LHA072	9	0.031	0.118298	2.43777	2.13525	0.0872984	0.302521	age	N. Yukon	Imperial	Upper Devonian	EPMA
243	1238-08	2009LHA072	10	0	-0.0516445	1.9186	1.58182	0.0516445	0.336784	age	N. Yukon	Imperial	Upper Devonian	EPMA
244	1238-08	2009LHA072	12	0.0401	0.164164	2.76724	2.28461	0.124064	0.482627	age	N. Yukon	Imperial	Upper Devonian	EPMA
245	1238-08	2009LHA072	13	0.0066	0.315038	2.12826	2.77594	0.308438	0.647678	age	N. Yukon	Imperial	Upper Devonian	EPMA
246	1238-08	2009LHA072	14	0.0258	0.030283	2.11828	1.84862	0.00448301	0.269661	age	N. Yukon	Imperial	Upper Devonian	EPMA
247	1238-08	2009LHA072	15	0.0333	0.127697	2.09831	2.16585	0.0943969	0.0675417	age	N. Yukon	Imperial	Upper Devonian	EPMA
248	1238-08	2009LHA072	1	0.1477	0.152461	2.06836	2.2465	0.00476083	0.178139	age	N. Yukon	Imperial	Upper Devonian	EPMA
249	1238-08	2009LHA072	2	0.032	0.105391	3.43617	2.09321	0.0733911	1.34295	age	N. Yukon	Imperial	Upper Devonian	EPMA
250	1238-08	2009LHA072	3	0.0114	0.0207117	1.8587	1.81745	0.0093117	0.0412469	age	N. Yukon	Imperial	Upper Devonian	EPMA
251	1238-08	2009LHA072	4	0.1255	0.121758	2.88705	2.14651	0.00374151	0.740533	age	N. Yukon	Imperial	Upper Devonian	EPMA
252	1238-08	2009LHA072	5	0.2394	0.212485	2.4777	2.44197	0.0269151	0.0357324	age	N. Yukon	Imperial	Upper Devonian	EPMA
253	1238-08	2009LHA072	6	0.014	0.140903	2.17818	2.20886	0.126903	0.0306765	age	N. Yukon	Imperial	Upper Devonian	EPMA
254	1238-08	2009LHA072	7	0.0385	0.127243	2.29799	2.16437	0.0887427	0.133617	age	N. Yukon	Imperial	Upper Devonian	EPMA
255	1238-08	2009LHA072	8	0.036	0.130187	2.74727	2.17396	0.0941871	0.573309	age	N. Yukon	Imperial	Upper Devonian	EPMA
256	1238-08	2009LHA072	9	0.0034	-0.0302738	2.05838	1.65141	0.0336738	0.406965	age	N. Yukon	Imperial	Upper Devonian	EPMA
257	1238-08	2009LHA072	10	0.1304	0.190135	2.33793	2.36919	0.0597348	0.0312591	age	N. Yukon	Imperial	Upper Devonian	EPMA
258	1238-08	2009LHA072	11	0.0379	0.224667	2.57754	2.48164	0.186767	0.0959004	age	N. Yukon	Imperial	Upper Devonian	EPMA
259	1238-08	2009LHA072	12	0.0754	0.202897	2.42778	2.41075	0.127497	0.0170376	age	N. Yukon	Imperial	Upper Devonian	EPMA
260	1238-08	2009LHA072	14	0.0039	0.156109	1.64903	2.25838	0.152209	0.609348	age	N. Yukon	Imperial	Upper Devonian	EPMA
261	1238-08	2009LHA072	1	0.0779	0.0695779	2.48769	1.97659	0.00832214	0.511103	length	N. Yukon	Imperial	Upper Devonian	EPMA
262	1238-08	2009LHA072	2	0.0073	0.124051	2.06836	2.15398	0.116751	0.0856215	length	N. Yukon	Imperial	Upper Devonian	EPMA
263	1238-08	2009LHA072	3	0.0156	0.115046	3.92538	2.12466	0.099446	1.80073	length	N. Yukon	Imperial	Upper Devonian	EPMA
264	1238-08	2009LHA072	4	0.125	0.156964	3.04679	2.26116	0.0319636	0.785629	length	N. Yukon	Imperial	Upper Devonian	EPMA
265	1238-08	2009LHA072	5	0.0507	0.186339	2.37786	2.35682	0.135639	0.0210392	length	N. Yukon	Imperial	Upper Devonian	EPMA
266	1238-08	2009LHA072	6	0.0714	0.073156	2.34791	1.98824	0.00175597	0.359675	length	N. Yukon	Imperial	Upper Devonian	EPMA
267	1238-08	2009LHA072	7	0.0937	0.19842	2.89703	2.39617	0.10472	0.500864	length	N. Yukon	Imperial	Upper Devonian	EPMA
268	1238-08	2009LHA072	9	0.0145	-0.00740411	1.93857	1.72589	0.0219041	0.21268	length	N. Yukon	Imperial	Upper Devonian	EPMA
269	1238-08	2009LHA072	11	0.0051	0.292164	2.19815	2.70145	0.287064	0.503301	length	N. Yukon	Imperial	Upper Devonian	EPMA
270	1238-08	2009LHA072	12	0.0269	0.049401	2.48769	1.91088	0.022501	0.57681	length	N. Yukon	Imperial	Upper Devonian	EPMA
271	1238-08	2009LHA072	15	0.0185	0.112943	2.34791	2.11781	0.0944434	0.230104	length	N. Yukon	Imperial	Upper Devonian	EPMA
272	1238-08	2009LHA072	1	0.0405	0.236183	3.77562	2.51915	0.195683	1.25648	length	N. Yukon	Imperial	Upper Devonian	EPMA
273	1238-08	2009LHA072	3	0.0084	-0.023671	1.78881	1.67291	0.032071	0.115894	length	N. Yukon	Imperial	Upper Devonian	EPMA
274	1238-08	2009LHA072	4	0.1511	0.127924	2.55758	2.16659	0.0231762	0.390983	length	N. Yukon	Imperial	Upper Devonian	EPMA
275	1238-08	2009LHA072	5	0.0296	0.120147	3.87546	2.14127	0.0905469	1.7342	length	N. Yukon	Imperial	Upper Devonian	EPMA
276	1238-08	2009LHA072	7	0.0457	0.113411	2.52762	2.11933	0.0677115	0.408292	length	N. Yukon	Imperial	Upper Devonian	EPMA
277	1238-08	2009LHA072	8	0.2368	0.233285	2.46772	2.50971	0.00351518	0.0419881	length	N. Yukon	Imperial	Upper Devonian	EPMA
278	1238-08	2009LHA072	11	0.021	-0.0366487	1.93857	1.63065	0.0576487	0.307917	length	N. Yukon	Imperial	Upper Devonian	EPMA
279	1238-08	2009LHA072	12	0.0088	0.0385709	1.95854	1.87561	0.0297709	0.0829272	length	N. Yukon	Imperial	Upper Devonian	EPMA
280	1238-08	2009LHA072	13	0.0306	0.136913	3.65582	2.19587	0.106313	1.45995	length	N. Yukon	Imperial	Upper Devonian	EPMA
281	1238-08	2009LHA072	14	0.0943	0.0288875	2.1083	1.84407	0.0654125	0.264222	length	N. Yukon	Imperial	Upper Devonian	EPMA
282	1238-08	2009LHA072	15	0.0499	0.121758	2.55758	2.14651	0.0718585	0.411061	length	N. Yukon	Imperial	Upper Devonian	EPMA
283	1238-08	2009LHA072	16	0.1271	0.175791	2.36788	2.32248	0.0486914	0.0454031	length	N. Yukon	Imperial	Upper Devonian	EPMA
284	1238-08	2009LHA072	18	0.0149	0.0943196	3.27642	2.05716	0.0794196	1.21927	length	N. Yukon	Imperial	Upper Devonian	EPMA
285	1238-08	2009LHA072	19	0.0737	0.191922	2.39783	2.37501	0.118222	0.0228235	length	N. Yukon	Imperial	Upper Devonian	EPMA
286	1148-09	2010LHA004A1	1	0.006	-0.00499646	1.82	1.73373	0.0109965	0.0862713	age	N. Yukon	Rat River	Lower Cretaceous (Aptian)	EPMA
287	1148-09	2010LHA004A1	2	0.0898	0.0341687	1.91	1.86127	0.0556313	0.0487272	age	N. Yukon	Rat River	Lower Cretaceous (Aptian)	EPMA
288	1148-09	2010LHA004A1	3	0.0986	0.137358	2.6	2.19732	0.0387579	0.402685	age	N. Yukon	Rat River	Lower Cretaceous (Aptian)	EPMA
289	1148-09	2010LHA004A1	4	0.1398	0.141785	2.53	2.21173	0.00198523	0.318267	age	N. Yukon	Rat River	Lower Cretaceous (Aptian)	EPMA
290	1148-09	2010LHA004A1	5	0.0174	-0.0239833	2.02	1.6719	0.0413833	0.348103	age	N. Yukon	Rat River	Lower Cretaceous (Aptian)	EPMA
291	1148-09	2010LHA004A1	6	0.003	-0.0620243	1.97	1.54801	0.0650243	0.421987	age	N. Yukon	Rat River	Lower Cretaceous (Aptian)	EPMA
292	1148-09	2010LHA004A1	7	0.0097	0.0726465	2.1	1.98658	0.0629465	0.113422	age	N. Yukon	Rat River	Lower Cretaceous (Aptian)	EPMA
293	1148-09	2010LHA004A1	8	0	-0.0533034	1.9	1.57641	0.0533034	0.323586	age	N. Yukon	Rat River	Lower Cretaceous (Aptian)	EPMA
294	1148-09	2010LHA004A1	9	0.0348	0.0426612	1.81	1.88893	0.00786122	0.0789292	age	N. Yukon	Rat River	Lower Cretaceous (Aptian)	EPMA
295	1148-09	2010LHA004A1	10	0.0066	0.0190024	2.19	1.81188	0.0124024	0.378117	age	N. Yukon	Rat River	Lower Cretaceous (Aptian)	EPMA
296	1148-09	2010LHA004A1	11	0.0018	-0.000217477	2.25	1.74929	0.00201748	0.500708	age	N. Yukon	Rat River	Lower Cretaceous (Aptian)	EPMA
297	1148-09	2010LHA004A1	12	0.1409	0.198811	2.55	2.39744	0.0579109	0.152559	age	N. Yukon	Rat River	Lower Cretaceous (Aptian)	EPMA
298	1148-09	2010LHA004A1	13	0.0192	-0.0159284	2	1.69813	0.0351284	0.301872	age	N. Yukon	Rat River	Lower Cretaceous (Aptian)	EPMA
299	1148-09	2010LHA004A1	14	0.0173	-0.0113428	1.89	1.71306	0.0286428	0.176939	age	N. Yukon	Rat River	Lower Cretaceous (Aptian)	EPMA
300	1148-09	2010LHA004A1	15	0.314	0.245128	2.68	2.54828	0.0688718	0.131723	age	N. Yukon	Rat River	Lower Cretaceous (Aptian)	EPMA
301	1148-09	2010LHA004A1	16	0.0664	0.0246762	2.17	1.83036	0.0417238	0.33964	age	N. Yukon	Rat River	Lower Cretaceous (Aptian)	EPMA
302	1148-09	2010LHA004A1	17	0.0282	-0.0230469	1.97	1.67495	0.0512469	0.295054	age	N. Yukon	Rat River	Lower Cretaceous (Aptian)	EPMA
303	1148-09	2010LHA004A1	18	0.0814	0.0618184	2.04	1.95132	0.0195816	0.0886841	age	N. Yukon	Rat River	Lower Cretaceous (Aptian)	EPMA
304	1148-09	2010LHA004A1	19	0.0097	0.00773951	1.77	1.7752	0.00196049	0.00520425	age	N. Yukon	Rat River	Lower Cretaceous (Aptian)	EPMA
305	1148-09	2010LHA004A1	20	0.0343	-0.00379719	1.63	1.73763	0.0380972	0.107634	age	N. Yukon	Rat River	Lower Cretaceous (Aptian)	EPMA
306	1148-09	2010LHA004A1	21	0.0057	0.000673249	2.06	1.75219	0.00502675	0.307808	age	N. Yukon	Rat River	Lower Cretaceous (Aptian)	EPMA
307	1148-09	2010LHA004A1	22	0.0058	0.110596	2.11	2.11016	0.104796	0.00016409	age	N. Yukon	Rat River	Lower Cretaceous (Aptian)	EPMA
308	1148-09	2010LHA004A1	23	0.0159	-0.0344078	1.72	1.63795	0.0503078	0.0820512	age	N. Yukon	Rat River	Lower Cretaceous (Aptian)	EPMA
309	1148-09	2010LHA004A1	24	0.0132	0.0322298	2.25	1.85496	0.0190298	0.395041	age	N. Yukon	Rat River	Lower Cretaceous (Aptian)	EPMA
310	1148-09	2010LHA004A1	25	0.007	-0.0162357	1.85	1.69713	0.0232357	0.152873	age	N. Yukon	Rat River	Lower Cretaceous (Aptian)	EPMA
311	1148-09	2010LHA004A1	26	0.0034	0.0167138	2.13	1.80443	0.0133138	0.32557	age	N. Yukon	Rat River	Lower Cretaceous (Aptian)	EPMA
312	1148-09	2010LHA004A1	27	0.0093	0.205023	2.01	2.41767	0.195723	0.40767	age	N. Yukon	Rat River	Lower Cretaceous (Aptian)	EPMA
313	1148-09	2010LHA004A1	28	0.027	-0.037291	2.05	1.62856	0.064291	0.421441	age	N. Yukon	Rat River	Lower Cretaceous (Aptian)	EPMA
314	1148-09	2010LHA004A1	29	0.08	0.073156	2.13	1.98824	0.00684403	0.141763	age	N. Yukon	Rat River	Lower Cretaceous (Aptian)	EPMA
315	1148-09	2010LHA004A1	30	0.3097	0.318087	2.62	2.78587	0.00838685	0.165872	age	N. Yukon	Rat River	Lower Cretaceous (Aptian)	EPMA
316	1148-09	2010LHA004A1	31	0.024	0.0426612	2.1	1.88893	0.0186612	0.211071	age	N. Yukon	Rat River	Lower Cretaceous (Aptian)	EPMA
317	1148-09	2010LHA004A1	32	0.0248	0.0459083	2.58	1.8995	0.0211083	0.680497	age	N. Yukon	Rat River	Lower Cretaceous (Aptian)	EPMA
318	1148-09	2010LHA004A1	33	0.0273	0.0344451	2.62	1.86217	0.00714505	0.757827	age	N. Yukon	Rat River	Lower Cretaceous (Aptian)	EPMA
319	1148-09	2010LHA004A1	35	0.0094	0.0198578	1.91	1.81467	0.0104578	0.0953316	age	N. Yukon	Rat River	Lower Cretaceous (Aptian)	EPMA
320	1148-09	2010LHA004A1	36	0.0201	-0.0268037	1.98	1.66271	0.0469037	0.317288	age	N. Yukon	Rat River	Lower Cretaceous (Aptian)	EPMA
321	1148-09	2010LHA004A1	37	0.0773	0.148132	1.9	2.2324	0.0708324	0.332403	age	N. Yukon	Rat River	Lower Cretaceous (Aptian)	EPMA
322	1148-09	2010LHA004A1	38	0.0062	-0.000217477	1.91	1.74929	0.00641748	0.160708	age	N. Yukon	Rat River	Lower Cretaceous (Aptian)	EPMA
323	1148-09	2010LHA004A1	39	0.0105	0.0155653	2.09	1.80069	0.00506529	0.289311	age	N. Yukon	Rat River	Lower Cretaceous (Aptian)	EPMA
324	1148-09	2010LHA004A1	40	0.0028	-0.0473583	2.18	1.59577	0.0501583	0.584226	age	N. Yukon	Rat River	Lower Cretaceous (Aptian)	EPMA
325	1148-09	2010LHA004A1	1	0.0488	0.00480801	1.92	1.76566	0.043992	0.154342	length	N. Yukon	Rat River	Lower Cretaceous (Aptian)	EPMA
326	1148-09	2010LHA004A1	2	0.0085	-0.0227352	2.03	1.67596	0.0312352	0.354039	length	N. Yukon	Rat River	Lower Cretaceous (Aptian)	EPMA
327	1148-09	2010LHA004A1	3	0	0.0960211	2.45	2.0627	0.0960211	0.387301	length	N. Yukon	Rat River	Lower Cretaceous (Aptian)	EPMA
328	1148-09	2010LHA004A1	4	0.0344	0.142886	2.63	2.21532	0.108486	0.414683	length	N. Yukon	Rat River	Lower Cretaceous (Aptian)	EPMA
329	1148-09	2010LHA004A1	5	0.0035	-0.0695309	2.44	1.52357	0.0730309	0.916432	length	N. Yukon	Rat River	Lower Cretaceous (Aptian)	EPMA
330	1148-09	2010LHA004A1	6	0.0016	-0.0113428	1.65	1.71306	0.0129428	0.0630614	length	N. Yukon	Rat River	Lower Cretaceous (Aptian)	EPMA
331	1148-09	2010LHA004A1	7	0.0288	-0.0389004	2.34	1.62332	0.0677004	0.716682	length	N. Yukon	Rat River	Lower Cretaceous (Aptian)	EPMA
332	1148-09	2010LHA004A1	8	0.0129	-0.00559723	1.99	1.73177	0.0184972	0.258228	length	N. Yukon	Rat River	Lower Cretaceous (Aptian)	EPMA
333	1148-09	2010LHA004A1	9	0.0763	0.0869573	2.55	2.03318	0.0106573	0.516817	length	N. Yukon	Rat River	Lower Cretaceous (Aptian)	EPMA
334	1148-09	2010LHA004A1	10	0.0378	-0.00770593	2.12	1.72491	0.0455059	0.395095	length	N. Yukon	Rat River	Lower Cretaceous (Aptian)	EPMA
335	1148-09	2010LHA004A1	11	0.0074	-0.000812224	1.94	1.74735	0.00821222	0.192645	length	N. Yukon	Rat River	Lower Cretaceous (Aptian)	EPMA
336	1148-09	2010LHA004A1	12	0.0017	-0.00891513	1.85	1.72097	0.0106151	0.129033	length	N. Yukon	Rat River	Lower Cretaceous (Aptian)	EPMA
337	1148-09	2010LHA004A1	13	0.0059	0.00126614	1.99	1.75412	0.00463386	0.235877	length	N. Yukon	Rat River	Lower Cretaceous (Aptian)	EPMA
338	1148-09	2010LHA004A1	14	0.0083	0.0161399	1.94	1.80256	0.00783988	0.137439	length	N. Yukon	Rat River	Lower Cretaceous (Aptian)	EPMA
339	1148-09	2010LHA004A1	15	0.0849	0.0167138	1.86	1.80443	0.0681862	0.0555705	length	N. Yukon	Rat River	Lower Cretaceous (Aptian)	EPMA
340	1148-09	2010LHA004A1	16	0.0042	-0.0563041	1.86	1.56664	0.0605041	0.293358	length	N. Yukon	Rat River	Lower Cretaceous (Aptian)	EPMA
341	1148-09	2010LHA004A1	17	0.0166	0.0135487	2.41	1.79412	0.00305126	0.615878	length	N. Yukon	Rat River	Lower Cretaceous (Aptian)	EPMA
342	1148-09	2010LHA004A1	18	0.0816	0.0170005	1.92	1.80536	0.0645995	0.114637	length	N. Yukon	Rat River	Lower Cretaceous (Aptian)	EPMA
343	1148-09	2010LHA004A1	19	0.0114	-0.0174669	1.98	1.69312	0.0288669	0.286882	length	N. Yukon	Rat River	Lower Cretaceous (Aptian)	EPMA
344	1148-09	2010LHA004A1	20	0.0138	-0.0450663	1.9	1.60324	0.0588663	0.296762	length	N. Yukon	Rat River	Lower Cretaceous (Aptian)	EPMA
345	1148-09	2010LHA004A1	21	0.0123	-0.0444135	2.45	1.60536	0.0567135	0.844636	length	N. Yukon	Rat River	Lower Cretaceous (Aptian)	EPMA
346	1148-09	2010LHA004A1	22	0.1988	0.196067	2.6	2.38851	0.00273251	0.211493	length	N. Yukon	Rat River	Lower Cretaceous (Aptian)	EPMA
347	1148-09	2010LHA004A1	23	0.0211	0.00598278	2.06	1.76948	0.0151172	0.290517	length	N. Yukon	Rat River	Lower Cretaceous (Aptian)	EPMA
348	1148-09	2010LHA004A1	24	0.0047	0.0190024	2.02	1.81188	0.0143024	0.208117	length	N. Yukon	Rat River	Lower Cretaceous (Aptian)	EPMA
349	1148-09	2010LHA004A1	25	0.0257	-0.0183923	2.47	1.6901	0.0440923	0.779896	length	N. Yukon	Rat River	Lower Cretaceous (Aptian)	EPMA
350	1148-09	2010LHA004A1	26	0.0178	0.017287	2.56	1.8063	0.00051303	0.753704	length	N. Yukon	Rat River	Lower Cretaceous (Aptian)	EPMA
351	1148-09	2010LHA004A1	27	0.021	0.01499	2.23	1.79882	0.00600999	0.431184	length	N. Yukon	Rat River	Lower Cretaceous (Aptian)	EPMA
352	1148-09	2010LHA004A1	28	0.0697	0.0496686	2.41	1.91175	0.0200314	0.498251	length	N. Yukon	Rat River	Lower Cretaceous (Aptian)	EPMA
353	1148-09	2010LHA004A1	29	0.0434	0.0300042	1.97	1.84771	0.0133958	0.122289	length	N. Yukon	Rat River	Lower Cretaceous (Aptian)	EPMA
354	1148-09	2010LHA004A1	30	0.1816	0.144203	2.93	2.21961	0.0373972	0.710394	length	N. Yukon	Rat River	Lower Cretaceous (Aptian)	EPMA
355	1148-09	2010LHA004A1	31	0.0235	0.140682	2.23	2.20814	0.117182	0.0218585	length	N. Yukon	Rat River	Lower Cretaceous (Aptian)	EPMA
356	1148-09	2010LHA004A1	32	0.0044	-0.029009	2.01	1.65553	0.033409	0.35447	length	N. Yukon	Rat River	Lower Cretaceous (Aptian)	EPMA
357	1148-09	2010LHA004A1	33	0.0543	0.094563	2.74	2.05795	0.040263	0.682049	length	N. Yukon	Rat River	Lower Cretaceous (Aptian)	EPMA
358	1148-09	2010LHA004A1	34	0.0316	0.0274879	2.12	1.83952	0.0041121	0.280484	length	N. Yukon	Rat River	Lower Cretaceous (Aptian)	EPMA
359	1148-09	2010LHA004A1	35	0.0395	0.0741733	2.39	1.99155	0.0346733	0.398449	length	N. Yukon	Rat River	Lower Cretaceous (Aptian)	EPMA
360	1148-09	2010LHA004A1	36	0.0443	0.0258029	2.06	1.83403	0.0184971	0.225971	length	N. Yukon	Rat River	Lower Cretaceous (Aptian)	EPMA
361	1148-09	2010LHA004A1	37	0.0108	-0.0113428	2.15	1.71306	0.0221428	0.436939	length	N. Yukon	Rat River	Lower Cretaceous (Aptian)	EPMA
362	1148-09	2010LHA004A1	38	0.0002	-0.0411627	2.3	1.61595	0.0413627	0.684049	length	N. Yukon	Rat River	Lower Cretaceous (Aptian)	EPMA
363	1148-09	2010LHA004A1	39	0.0275	0.000376526	2.31	1.75123	0.0271235	0.558774	length	N. Yukon	Rat River	Lower Cretaceous (Aptian)	EPMA
364	1148-09	2010LHA004A1	40	0.0039	-0.073676	1.98	1.51007	0.077576	0.469931	length	N. Yukon	Rat River	Lower Cretaceous (Aptian)	EPMA
365	1148-09	2010LHA004A1	41	0.0283	0.012971	2.01	1.79224	0.015329	0.217759	length	N. Yukon	Rat River	Lower Cretaceous (Aptian)	EPMA
366	1148-09	2010LHA004A1	42	0.0111	0.150518	2.38	2.24017	0.139418	0.139828	length	N. Yukon	Rat River	Lower Cretaceous (Aptian)	EPMA
367	1148-09	2010LHA004A1	43	0.0162	-0.036328	1.76	1.6317	0.052528	0.128304	length	N. Yukon	Rat River	Lower Cretaceous (Aptian)	EPMA
368	1148-09	2010LHA004A1	44	0.0478	0.0135487	2.25	1.79412	0.0342513	0.455878	length	N. Yukon	Rat River	Lower Cretaceous (Aptian)	EPMA
369	1148-09	2010LHA004A1	45	0.1565	0.129509	2.38	2.17176	0.0269908	0.208244	length	N. Yukon	Rat River	Lower Cretaceous (Aptian)	EPMA
370	1148-09	2010LHA004A1	46	0.0125	-0.0199388	1.98	1.68507	0.0324388	0.294932	length	N. Yukon	Rat River	Lower Cretaceous (Aptian)	EPMA
371	1148-09	2010LHA004A1	47	0.1838	0.0659726	3.11	1.96484	0.117827	1.14516	length	N. Yukon	Rat River	Lower Cretaceous (Aptian)	EPMA
372	1148-09	2010LHA004A1	48	0.0313	0.041846	2.6	1.88627	0.010546	0.713726	length	N. Yukon	Rat River	Lower Cretaceous (Aptian)	EPMA
373	1148-09	2010LHA004A1	49	0.1157	0.10871	2.29	2.10402	0.00698999	0.185978	length	N. Yukon	Rat River	Lower Cretaceous (Aptian)	EPMA
374	1148-09	2010LHA004A1	50	0.1806	0.225407	2.27	2.48405	0.0448066	0.214052	length	N. Yukon	Rat River	Lower Cretaceous (Aptian)	EPMA
375	1148-09	2010LHA004A1	51	0.3757	0.20483	2.7	2.41704	0.17087	0.282958	length	N. Yukon	Rat River	Lower Cretaceous (Aptian)	EPMA
376	1148-09	2010LHA004A1	52	0.0466	0.113411	2.54	2.11933	0.0668115	0.420668	length	N. Yukon	Rat River	Lower Cretaceous (Aptian)	EPMA
377	1148-09	2010LHA004A1	53	0.0716	0.0246762	2.09	1.83036	0.0469238	0.25964	length	N. Yukon	Rat River	Lower Cretaceous (Aptian)	EPMA
378	1148-09	2010LHA004A1	54	0.1993	0.243175	2.66	2.54192	0.0438747	0.118085	length	N. Yukon	Rat River	Lower Cretaceous (Aptian)	EPMA
379	1148-09	2010LHA004A1	55	0.0607	0.0751886	2.29	1.99486	0.0144886	0.295143	length	N. Yukon	Rat River	Lower Cretaceous (Aptian)	EPMA
380	1148-09	2010LHA004A1	56	0.0511	0.0906527	2.5	2.04522	0.0395527	0.454783	length	N. Yukon	Rat River	Lower Cretaceous (Aptian)	EPMA
381	1148-09	2010LHA004A1	57	0.006	-0.0242959	2.18	1.67088	0.0302959	0.509121	length	N. Yukon	Rat River	Lower Cretaceous (Aptian)	EPMA
382	1148-09	2010LHA004A1	58	0.1693	0.235279	1.75	2.5162	0.0659794	0.766203	length	N. Yukon	Rat River	Lower Cretaceous (Aptian)	EPMA
383	1148-09	2010LHA004A1	59	0.0055	0.00598278	2.59	1.76948	0.000482784	0.820517	length	N. Yukon	Rat River	Lower Cretaceous (Aptian)	EPMA
384	1148-09	2010LHA004A1	60	0.087	0.0263652	2.02	1.83586	0.0606348	0.18414	length	N. Yukon	Rat River	Lower Cretaceous (Aptian)	EPMA
385	1148-09	2010LHA004A1	61	0.021	0.012971	1.95	1.79224	0.00802899	0.157759	length	N. Yukon	Rat River	Lower Cretaceous (Aptian)	EPMA
386	1148-09	2010LHA004A1	62	0.0157	0.00744717	2.09	1.77425	0.00825283	0.315748	length	N. Yukon	Rat River	Lower Cretaceous (Aptian)	EPMA
387	1148-09	2010LHA004A1	63	0.0191	0.110831	2.34	2.11093	0.0917314	0.22907	length	N. Yukon	Rat River	Lower Cretaceous (Aptian)	EPMA
388	1148-09	2010LHA004A1	64	0.0191	0.000673249	1.99	1.75219	0.0184268	0.237808	length	N. Yukon	Rat River	Lower Cretaceous (Aptian)	EPMA
389	1148-09	2010LHA004A1	65	0.0064	-0.0246086	2.22	1.66986	0.0310086	0.55014	length	N. Yukon	Rat River	Lower Cretaceous (Aptian)	EPMA
390	1148-09	2010LHA004A1	66	0	0.00451386	1.96	1.7647	0.00451386	0.1953	length	N. Yukon	Rat River	Lower Cretaceous (Aptian)	EPMA
391	1148-09	2010LHA004A1	67	0.0053	-0.0261755	1.98	1.66476	0.0314755	0.315242	length	N. Yukon	Rat River	Lower Cretaceous (Aptian)	EPMA
392	1148-09	2010LHA004A1	68	0.0059	-0.0315419	1.98	1.64728	0.0374419	0.332719	length	N. Yukon	Rat River	Lower Cretaceous (Aptian)	EPMA
393	1148-09	2010LHA004A1	69	0.0989	0.15461	2.42	2.2535	0.0557103	0.166501	length	N. Yukon	Rat River	Lower Cretaceous (Aptian)	EPMA
394	1148-09	2010LHA004A1	70	0.0553	0.0338922	2.43	1.86037	0.0214078	0.569628	length	N. Yukon	Rat River	Lower Cretaceous (Aptian)	EPMA
395	1148-09	2010LHA004A1	71	0.0152	0.0499361	1.91	1.91262	0.0347361	0.00262029	length	N. Yukon	Rat River	Lower Cretaceous (Aptian)	EPMA
396	1148-09	2010LHA004A1	72	0.0277	0.0091985	2.33	1.77996	0.0185015	0.550044	length	N. Yukon	Rat River	Lower Cretaceous (Aptian)	EPMA
397	1148-09	2010LHA004A1	73	0.0037	0.112943	2.16	2.11781	0.109243	0.042192	length	N. Yukon	Rat River	Lower Cretaceous (Aptian)	EPMA
398	1148-09	2010LHA004A1	74	0.0013	-0.0218012	2	1.679	0.0231012	0.320997	length	N. Yukon	Rat River	Lower Cretaceous (Aptian)	EPMA
399	1148-09	2010LHA004A1	75	0.0374	0.0787248	1.76	2.00637	0.0413248	0.246373	length	N. Yukon	Rat River	Lower Cretaceous (Aptian)	EPMA
400	1148-09	2010LHA004A1	76	0.0356	7.96176e-05	1.97	1.75026	0.0355204	0.219741	length	N. Yukon	Rat River	Lower Cretaceous (Aptian)	EPMA
401	1148-09	2010LHA004A1	77	0.0216	-0.0147012	2.08	1.70212	0.0363012	0.377876	length	N. Yukon	Rat River	Lower Cretaceous (Aptian)	EPMA
402	1148-09	2010LHA004A1	78	0.0218	0.0291669	1.92	1.84498	0.00736694	0.0750158	length	N. Yukon	Rat River	Lower Cretaceous (Aptian)	EPMA
403	1148-09	2010LHA004A1	79	0.0742	0.0950495	1.82	2.05954	0.0208495	0.239535	length	N. Yukon	Rat River	Lower Cretaceous (Aptian)	EPMA
404	1148-09	2010LHA004A1	80	0.0267	-0.0147012	2	1.70212	0.0414012	0.297876	length	N. Yukon	Rat River	Lower Cretaceous (Aptian)	EPMA
405	1148-09	2010LHA004A1	81	0.0322	-0.00982405	1.95	1.71801	0.042024	0.231993	length	N. Yukon	Rat River	Lower Cretaceous (Aptian)	EPMA
406	1148-14	2010LHA098B1	1	0.0317	0.109418	2.52762	2.10633	0.0777182	0.421296	age	N. Yukon	Mt. Goodenough	Lower Cretaceous (Barremian)	EPMA
407	1148-14	2010LHA098B1	2	0.004	0.0297253	2.00846	1.8468	0.0257253	0.161653	age	N. Yukon	Mt. Goodenough	Lower Cretaceous (Barremian)	EPMA
408	1148-14	2010LHA098B1	3	0.0725	0.149001	2.4777	2.23523	0.0765013	0.242471	age	N. Yukon	Mt. Goodenough	Lower Cretaceous (Barremian)	EPMA
409	1148-14	2010LHA098B1	4	0.0151	-0.0293249	1.98849	1.6545	0.0444249	0.333987	age	N. Yukon	Mt. Goodenough	Lower Cretaceous (Barremian)	EPMA
410	1148-14	2010LHA098B1	5	0.0821	0.173942	2.34791	2.31645	0.0918419	0.0314582	age	N. Yukon	Mt. Goodenough	Lower Cretaceous (Barremian)	EPMA
411	1148-14	2010LHA098B1	6	0.0063	0.00156231	1.96852	1.75509	0.00473769	0.213432	age	N. Yukon	Mt. Goodenough	Lower Cretaceous (Barremian)	EPMA
412	1148-14	2010LHA098B1	7	0.0365	0.0713703	1.84871	1.98242	0.0348703	0.13371	age	N. Yukon	Mt. Goodenough	Lower Cretaceous (Barremian)	EPMA
413	1148-14	2010LHA098B1	8	0.0297	0.0639	2.18817	1.95809	0.0342	0.230073	age	N. Yukon	Mt. Goodenough	Lower Cretaceous (Barremian)	EPMA
414	1148-14	2010LHA098B1	9	0.0093	0.0112336	1.96852	1.78658	0.00193358	0.181937	age	N. Yukon	Mt. Goodenough	Lower Cretaceous (Barremian)	EPMA
415	1148-14	2010LHA098B1	10	0.138	0.180892	2.69735	2.33909	0.0428915	0.358266	age	N. Yukon	Mt. Goodenough	Lower Cretaceous (Barremian)	EPMA
416	1148-14	2010LHA098B1	12	0.2481	0.273004	1.9186	2.63906	0.0249038	0.720456	age	N. Yukon	Mt. Goodenough	Lower Cretaceous (Barremian)	EPMA
417	1148-14	2010LHA098B1	13	0.1017	0.142226	1.9186	2.21317	0.0405257	0.294568	age	N. Yukon	Mt. Goodenough	Lower Cretaceous (Barremian)	EPMA
418	1148-14	2010LHA098B1	14	0.1601	0.282435	2.29799	2.66977	0.122335	0.371777	age	N. Yukon	Mt. Goodenough	Lower Cretaceous (Barremian)	EPMA
419	1148-14	2010LHA098B1	15	0.1073	0.247779	1.9785	2.55691	0.140479	0.578406	age	N. Yukon	Mt. Goodenough	Lower Cretaceous (Barremian)	EPMA
420	1148-14	2010LHA098B1	16	0.0324	0.0316744	2.12826	1.85315	0.00072558	0.275114	age	N. Yukon	Mt. Goodenough	Lower Cretaceous (Barremian)	EPMA
421	1148-14	2010LHA098B1	17	0.2335	0.513201	2.64743	3.42128	0.279701	0.773843	age	N. Yukon	Mt. Goodenough	Lower Cretaceous (Barremian)	EPMA
422	1148-14	2010LHA098B1	18	0.077	0.219271	2.32794	2.46407	0.142271	0.136125	age	N. Yukon	Mt. Goodenough	Lower Cretaceous (Barremian)	EPMA
423	1148-14	2010LHA098B1	19	0.0374	0.0333387	1.88865	1.85857	0.00406126	0.0300781	age	N. Yukon	Mt. Goodenough	Lower Cretaceous (Barremian)	EPMA
424	1148-14	2010LHA098B1	20	0	-0.0224237	2.06836	1.67698	0.0224237	0.391384	age	N. Yukon	Mt. Goodenough	Lower Cretaceous (Barremian)	EPMA
425	1148-14	2010LHA098B1	21	0.0405	0.152461	1.78881	2.2465	0.111961	0.457691	age	N. Yukon	Mt. Goodenough	Lower Cretaceous (Barremian)	EPMA
426	1148-14	2010LHA098B1	22	0.2503	0.261673	2.9769	2.60216	0.0113728	0.374748	age	N. Yukon	Mt. Goodenough	Lower Cretaceous (Barremian)	EPMA
427	1148-14	2010LHA098B1	23	0.1477	0.17353	2.39783	2.31511	0.0258299	0.0827199	age	N. Yukon	Mt. Goodenough	Lower Cretaceous (Barremian)	EPMA
428	1148-14	2010LHA098B1	24	0.1768	0.324877	2.49767	2.80798	0.148077	0.310312	age	N. Yukon	Mt. Goodenough	Lower Cretaceous (Barremian)	EPMA
429	1148-14	2010LHA098B1	25	0.0806	0.177634	2.48769	2.32848	0.0970338	0.159211	age	N. Yukon	Mt. Goodenough	Lower Cretaceous (Barremian)	EPMA
430	1148-14	2010LHA098B1	1	0.0098	-0.0122564	1.98849	1.71009	0.0220564	0.278402	length	N. Yukon	Mt. Goodenough	Lower Cretaceous (Barremian)	EPMA
431	1148-14	2010LHA098B1	2	0.0021	-0.0171588	2.09831	1.69412	0.0192588	0.404191	length	N. Yukon	Mt. Goodenough	Lower Cretaceous (Barremian)	EPMA
432	1148-14	2010LHA098B1	3	0.0379	0.0464473	2.1083	1.90126	0.00854729	0.207037	length	N. Yukon	Mt. Goodenough	Lower Cretaceous (Barremian)	EPMA
433	1148-14	2010LHA098B1	4	0.0244	-0.0286933	1.95854	1.65656	0.0530933	0.301978	length	N. Yukon	Mt. Goodenough	Lower Cretaceous (Barremian)	EPMA
434	1148-14	2010LHA098B1	5	0.0665	0.143105	1.79879	2.21603	0.0766054	0.417241	length	N. Yukon	Mt. Goodenough	Lower Cretaceous (Barremian)	EPMA
435	1148-14	2010LHA098B1	6	0.0772	0.151814	2.38785	2.24439	0.0746141	0.143455	length	N. Yukon	Mt. Goodenough	Lower Cretaceous (Barremian)	EPMA
436	1148-14	2010LHA098B1	7	0.1346	0.1815	3.02682	2.34107	0.0468998	0.685757	length	N. Yukon	Mt. Goodenough	Lower Cretaceous (Barremian)	EPMA
437	1148-14	2010LHA098B1	8	0.0323	0.0586788	2.2281	1.94109	0.0263788	0.287013	length	N. Yukon	Mt. Goodenough	Lower Cretaceous (Barremian)	EPMA
438	1148-14	2010LHA098B1	9	0.2068	0.421219	3.61588	3.12173	0.214419	0.494152	length	N. Yukon	Mt. Goodenough	Lower Cretaceous (Barremian)	EPMA
439	1148-14	2010LHA098B1	10	0.069	0.094076	1.92858	2.05636	0.025076	0.127781	length	N. Yukon	Mt. Goodenough	Lower Cretaceous (Barremian)	EPMA
440	1148-14	2010LHA098B1	11	0.0588	0.127243	2.49767	2.16437	0.0684427	0.333297	length	N. Yukon	Mt. Goodenough	Lower Cretaceous (Barremian)	EPMA
441	1148-14	2010LHA098B1	12	0.099	0.263381	2.62746	2.60772	0.164381	0.0197447	length	N. Yukon	Mt. Goodenough	Lower Cretaceous (Barremian)	EPMA
442	1148-14	2010LHA098B1	13	0.1382	0.178654	2.9769	2.3318	0.0404542	0.645104	length	N. Yukon	Mt. Goodenough	Lower Cretaceous (Barremian)	EPMA
443	1148-14	2010LHA098B1	14	0.0012	-0.0156213	2.12826	1.69913	0.0168213	0.429136	length	N. Yukon	Mt. Goodenough	Lower Cretaceous (Barremian)	EPMA
444	1148-14	2010LHA098B1	15	0.1764	0.179469	2.54759	2.33445	0.003069	0.213139	length	N. Yukon	Mt. Goodenough	Lower Cretaceous (Barremian)	EPMA
445	1148-14	2010LHA098B1	16	0.14	0.210392	2.76724	2.43516	0.070392	0.332084	length	N. Yukon	Mt. Goodenough	Lower Cretaceous (Barremian)	EPMA
446	1148-14	2010LHA098B1	17	0.0089	0.0393918	2.04839	1.87828	0.0304918	0.17011	length	N. Yukon	Mt. Goodenough	Lower Cretaceous (Barremian)	EPMA
447	1148-14	2010LHA098B1	18	0.0351	0.0118134	2.06836	1.78847	0.0232866	0.279889	length	N. Yukon	Mt. Goodenough	Lower Cretaceous (Barremian)	EPMA
448	1148-14	2010LHA098B1	19	0.1044	0.277495	2.43777	2.65368	0.173095	0.215912	length	N. Yukon	Mt. Goodenough	Lower Cretaceous (Barremian)	EPMA
449	1148-14	2010LHA098B1	20	0.1305	0.221883	2.80718	2.47258	0.0913834	0.334598	length	N. Yukon	Mt. Goodenough	Lower Cretaceous (Barremian)	EPMA
450	1148-14	2010LHA098B1	21	0.3411	0.321871	3.43617	2.7982	0.019229	0.637973	length	N. Yukon	Mt. Goodenough	Lower Cretaceous (Barremian)	EPMA
451	1148-14	2010LHA098B1	22	0.0025	0.030283	2.1682	1.84862	0.027783	0.319581	length	N. Yukon	Mt. Goodenough	Lower Cretaceous (Barremian)	EPMA
452	1148-14	2010LHA098B1	23	0.011	0.0103625	2.23809	1.78375	0.000637532	0.454342	length	N. Yukon	Mt. Goodenough	Lower Cretaceous (Barremian)	EPMA
453	1148-14	2010LHA098B1	24	0.0167	0.0187169	2.50766	1.81095	0.00201695	0.696703	length	N. Yukon	Mt. Goodenough	Lower Cretaceous (Barremian)	EPMA
454	1148-04	2010LHA134B1	1	0.1294	0.190731	2.48	2.37113	0.0613314	0.10887	age	N. Yukon	Hart River	Carboniferous	EPMA
455	1148-04	2010LHA134B1	2	0.0294	-0.00891513	2.17	1.72097	0.0383151	0.449033	age	N. Yukon	Hart River	Carboniferous	EPMA
456	1148-04	2010LHA134B1	3	0	-0.0719445	2.11	1.51571	0.0719445	0.594292	age	N. Yukon	Hart River	Carboniferous	EPMA
457	1148-04	2010LHA134B1	4	0.0064	-0.0643999	0	1.54028	0.0707999	1.54028	age	N. Yukon	Hart River	Carboniferous	EPMA
458	1148-04	2010LHA134B1	5	0.3023	0.2912	2.44	2.69831	0.0110997	0.258314	age	N. Yukon	Hart River	Carboniferous	EPMA
459	1148-04	2010LHA134B1	6	0.0048	-0.035687	1.74	1.63378	0.040487	0.106217	age	N. Yukon	Hart River	Carboniferous	EPMA
460	1148-04	2010LHA134B1	7	0.0011	0.234011	2.03	2.51207	0.232911	0.482073	age	N. Yukon	Hart River	Carboniferous	EPMA
461	1148-04	2010LHA134B1	8	0.3811	0.345544	2.96	2.87529	0.0355561	0.0847126	age	N. Yukon	Hart River	Carboniferous	EPMA
462	1148-04	2010LHA134B1	9	0.1381	0.186138	2.42	2.35617	0.0480381	0.0638285	age	N. Yukon	Hart River	Carboniferous	EPMA
463	1148-04	2010LHA134B1	1	0.2288	0.0968141	2.28801	2.06528	0.131986	0.222726	age	N. Yukon	Hart River	Carboniferous	ICPMS
464	1148-04	2010LHA134B1	2	0	-0.0533552	1.86868	1.57625	0.0533552	0.292435	age	N. Yukon	Hart River	Carboniferous	ICPMS
465	1148-04	2010LHA134B1	3	0.0491	0.0771223	2.04839	2.00115	0.0280223	0.0472378	age	N. Yukon	Hart River	Carboniferous	ICPMS
466	1148-04	2010LHA134B1	1	0.2293	0.314213	2.32794	2.77325	0.0849125	0.445311	age	N. Yukon	Hart River	Carboniferous	ICPMS
467	1148-04	2010LHA134B1	3	0.0739	0.0234064	1.76884	1.82622	0.0504936	0.0573845	age	N. Yukon	Hart River	Carboniferous	ICPMS
468	1148-04	2010LHA134B1	4	0.0412	-0.0612048	1.83873	1.55068	0.102405	0.288046	age	N. Yukon	Hart River	Carboniferous	ICPMS
469	1148-04	2010LHA134B1	5	0.2772	0.198116	2.26804	2.39518	0.079084	0.127138	age	N. Yukon	Hart River	Carboniferous	ICPMS
470	1148-04	2010LHA134B1	1	0.1467	0.197441	2.45	2.39298	0.0507412	0.0570192	length	N. Yukon	Hart River	Carboniferous	EPMA
471	1148-04	2010LHA134B1	2	0.0363	-0.0187012	2.39	1.6891	0.0550012	0.700902	length	N. Yukon	Hart River	Carboniferous	EPMA
472	1148-04	2010LHA134B1	3	0.0642	0.24157	2.23	2.53669	0.17737	0.306691	length	N. Yukon	Hart River	Carboniferous	EPMA
473	1148-04	2010LHA134B1	4	0.3185	0.296955	2.99	2.71705	0.0215449	0.272945	length	N. Yukon	Hart River	Carboniferous	EPMA
474	1148-04	2010LHA134B1	5	0.0006	-0.023671	2.01	1.67291	0.024271	0.337086	length	N. Yukon	Hart River	Carboniferous	EPMA
475	1148-04	2010LHA134B1	6	0.4101	0.360092	3.79	2.92266	0.0500081	0.867336	length	N. Yukon	Hart River	Carboniferous	EPMA
476	1148-04	2010LHA134B1	1	0.078	0.150085	2.12826	2.23876	0.0720851	0.110498	length	N. Yukon	Hart River	Carboniferous	ICPMS
477	1148-04	2010LHA134B1	2	0.0086	-0.04572	1.89863	1.60111	0.05432	0.297522	length	N. Yukon	Hart River	Carboniferous	ICPMS
478	1148-04	2010LHA134B1	1	0.3207	0.332309	2.43777	2.83219	0.0116089	0.394419	length	N. Yukon	Hart River	Carboniferous	ICPMS
479	1148-04	2010LHA134B1	2	0.0073	-0.0107347	1.94855	1.71504	0.0180347	0.23351	length	N. Yukon	Hart River	Carboniferous	ICPMS
480	1148-04	2010LHA134B1	3	0.0422	0.0135487	2.18817	1.79412	0.0286513	0.394046	length	N. Yukon	Hart River	Carboniferous	ICPMS
481	1148-04	2010LHA134B1	4	0.3756	0.274005	2.37786	2.64232	0.101595	0.264453	length	N. Yukon	Hart River	Carboniferous	ICPMS
482	1148-10	2010LHA150	1	0.0369	0.0442875	1.8587	1.89423	0.00738752	0.0355293	age	N. Yukon	Slats Creek	early to middle Cambrian	EPMA
483	1148-10	2010LHA150	2	0.1524	0.194295	2.70734	2.38274	0.0418955	0.324599	age	N. Yukon	Slats Creek	early to middle Cambrian	EPMA
484	1148-10	2010LHA150	3	0.1251	0.178654	2.27802	2.3318	0.0535542	0.0537757	age	N. Yukon	Slats Creek	early to middle Cambrian	EPMA
485	1148-10	2010LHA150	4	0.0884	0.0586788	2.26804	1.94109	0.0297212	0.326949	age	N. Yukon	Slats Creek	early to middle Cambrian	EPMA
486	1148-10	2010LHA150	5	0.141	0.190533	1.98849	2.37048	0.0495326	0.381995	age	N. Yukon	Slats Creek	early to middle Cambrian	EPMA
487	1148-10	2010LHA150	6	0.0129	-0.0214903	1.82874	1.68002	0.0343903	0.148729	age	N. Yukon	Slats Creek	early to middle Cambrian	EPMA
488	1148-10	2010LHA150	7	0.01	-0.0252348	2.17	1.66782	0.0352348	0.502179	age	N. Yukon	Slats Creek	early to middle Cambrian	EPMA
489	1148-10	2010LHA150	8	0.0433	0.17105	2.1083	2.30704	0.12775	0.198742	age	N. Yukon	Slats Creek	early to middle Cambrian	EPMA
490	1148-10	2010LHA150	9	0.0072	0.00627602	2.14823	1.77044	0.000923976	0.377794	age	N. Yukon	Slats Creek	early to middle Cambrian	EPMA
491	1148-10	2010LHA150	10	0.4278	0.427053	2.53761	3.14073	0.000747391	0.603118	age	N. Yukon	Slats Creek	early to middle Cambrian	EPMA
492	1148-10	2010LHA150	11	0.1275	0.210773	2.74727	2.4364	0.0832732	0.310875	age	N. Yukon	Slats Creek	early to middle Cambrian	EPMA
493	1148-10	2010LHA150	12	0.006	-0.0719445	1.90862	1.51571	0.0779445	0.392908	age	N. Yukon	Slats Creek	early to middle Cambrian	EPMA
494	1148-10	2010LHA150	13	0.1366	0.190731	2.64743	2.37113	0.0541314	0.276302	age	N. Yukon	Slats Creek	early to middle Cambrian	EPMA
495	1148-10	2010LHA150	14	0.0061	-0.0376124	2.02842	1.62751	0.0437124	0.400911	age	N. Yukon	Slats Creek	early to middle Cambrian	EPMA
496	1148-10	2010LHA150	15	0.0362	0.0881923	2.21812	2.0372	0.0519923	0.180916	age	N. Yukon	Slats Creek	early to middle Cambrian	EPMA
497	1148-10	2010LHA150	16	0.0181	0.0371996	2.19815	1.87114	0.0190996	0.327009	age	N. Yukon	Slats Creek	early to middle Cambrian	EPMA
498	1148-10	2010LHA150	17	0.0853	0.197637	2.1083	2.39362	0.112337	0.285323	age	N. Yukon	Slats Creek	early to middle Cambrian	EPMA
499	1148-10	2010LHA150	18	0.162	0.218146	2.08833	2.46041	0.0561463	0.37208	age	N. Yukon	Slats Creek	early to middle Cambrian	EPMA
500	1148-10	2010LHA150	19	0.0207	0.0393918	1.83873	1.87828	0.0186918	0.0395541	age	N. Yukon	Slats Creek	early to middle Cambrian	EPMA
501	1148-10	2010LHA150	20	0.1398	0.235279	1.94855	2.5162	0.0954794	0.567651	age	N. Yukon	Slats Creek	early to middle Cambrian	EPMA
502	1148-10	2010LHA150	21	0.0237	-0.0171588	1.98849	1.69412	0.0408588	0.294367	age	N. Yukon	Slats Creek	early to middle Cambrian	EPMA
503	1148-10	2010LHA150	22	0.0778	0.0226981	2.25806	1.82392	0.0551019	0.434138	age	N. Yukon	Slats Creek	early to middle Cambrian	EPMA
504	1148-10	2010LHA150	23	0.0487	0.00304038	1.98849	1.7599	0.0456596	0.228587	age	N. Yukon	Slats Creek	early to middle Cambrian	EPMA
505	1148-10	2010LHA150	24	0.0233	0.0453686	2.27802	1.89775	0.0220686	0.380278	age	N. Yukon	Slats Creek	early to middle Cambrian	EPMA
506	1148-10	2010LHA150	25	0.3115	0.407069	2.23809	3.07565	0.0955687	0.837559	age	N. Yukon	Slats Creek	early to middle Cambrian	EPMA
507	1148-10	2010LHA150	26	0.0234	-0.00110988	1.75886	1.74639	0.0245099	0.0124704	age	N. Yukon	Slats Creek	early to middle Cambrian	EPMA
508	1148-10	2010LHA150	27	0.1244	0.229087	2.64743	2.49604	0.104687	0.151394	age	N. Yukon	Slats Creek	early to middle Cambrian	EPMA
509	1148-10	2010LHA150	28	0.029	-0.00469636	1.94855	1.73471	0.0336964	0.213846	age	N. Yukon	Slats Creek	early to middle Cambrian	EPMA
510	1148-10	2010LHA150	29	0.0778	0.193901	2.09831	2.38145	0.116101	0.283139	age	N. Yukon	Slats Creek	early to middle Cambrian	EPMA
511	1148-10	2010LHA150	30	0.0081	0.089178	2.05838	2.04041	0.081078	0.0179616	age	N. Yukon	Slats Creek	early to middle Cambrian	EPMA
512	1148-10	2010LHA150	31	0.0087	-0.037291	2.14823	1.62856	0.045991	0.519673	age	N. Yukon	Slats Creek	early to middle Cambrian	EPMA
513	1148-10	2010LHA150	32	0.0514	0.107527	1.99847	2.10017	0.0561273	0.101698	age	N. Yukon	Slats Creek	early to middle Cambrian	EPMA
514	1148-10	2010LHA150	33	0.0122	0.0141258	2.11828	1.796	0.00192578	0.322278	age	N. Yukon	Slats Creek	early to middle Cambrian	EPMA
515	1148-10	2010LHA150	34	0.0059	-0.048673	1.78881	1.59149	0.054573	0.197315	age	N. Yukon	Slats Creek	early to middle Cambrian	EPMA
516	1148-10	2010LHA150	35	0.0162	0.0115236	2.01844	1.78753	0.00467641	0.230913	age	N. Yukon	Slats Creek	early to middle Cambrian	EPMA
517	1148-10	2010LHA150	36	0.0394	0.118298	1.94855	2.13525	0.0788984	0.186695	age	N. Yukon	Slats Creek	early to middle Cambrian	EPMA
518	1148-10	2010LHA150	37	0.0096	0.0488653	1.92858	1.90913	0.0392653	0.0194507	age	N. Yukon	Slats Creek	early to middle Cambrian	EPMA
519	1148-10	2010LHA150	38	0.0134	-0.00529675	1.95854	1.73275	0.0186967	0.225785	age	N. Yukon	Slats Creek	early to middle Cambrian	EPMA
520	1148-10	2010LHA150	39	0.0095	-0.048344	1.83873	1.59256	0.057844	0.246164	age	N. Yukon	Slats Creek	early to middle Cambrian	EPMA
521	1148-10	2010LHA150	40	0.0229	-0.0147012	2.26804	1.70212	0.0376012	0.565916	age	N. Yukon	Slats Creek	early to middle Cambrian	EPMA
522	1148-10	2010LHA150	1	0.1029	0.112943	2.14823	2.11781	0.0100434	0.030424	length	N. Yukon	Slats Creek	early to middle Cambrian	EPMA
523	1148-10	2010LHA150	2	0.0754	0.168766	2.52762	2.2996	0.0933662	0.228025	length	N. Yukon	Slats Creek	early to middle Cambrian	EPMA
524	1148-10	2010LHA150	3	0.0049	-0.0202487	1.90862	1.68406	0.0251487	0.224557	length	N. Yukon	Slats Creek	early to middle Cambrian	EPMA
525	1148-10	2010LHA150	4	0.0259	0.00333544	2.00846	1.76086	0.0225646	0.247594	length	N. Yukon	Slats Creek	early to middle Cambrian	EPMA
526	1148-10	2010LHA150	5	0.0552	0.0654553	2.03841	1.96316	0.0102553	0.0752484	length	N. Yukon	Slats Creek	early to middle Cambrian	EPMA
527	1148-10	2010LHA150	6	0.0139	-0.0309074	1.80878	1.64935	0.0448074	0.159428	length	N. Yukon	Slats Creek	early to middle Cambrian	EPMA
528	1148-10	2010LHA150	7	0.1215	0.194887	2.42778	2.38466	0.0733869	0.0431215	length	N. Yukon	Slats Creek	early to middle Cambrian	EPMA
529	1148-10	2010LHA150	8	0.0492	-0.00740411	1.99847	1.72589	0.0566041	0.272584	length	N. Yukon	Slats Creek	early to middle Cambrian	EPMA
530	1148-10	2010LHA150	9	0.1527	0.0822348	2.30798	2.0178	0.0704652	0.290173	length	N. Yukon	Slats Creek	early to middle Cambrian	EPMA
531	1148-10	2010LHA150	10	0.1774	0.288135	2.94695	2.68833	0.110735	0.258622	length	N. Yukon	Slats Creek	early to middle Cambrian	EPMA
532	1148-10	2010LHA150	11	0.1252	0.215135	2.03841	2.4506	0.0899353	0.412195	length	N. Yukon	Slats Creek	early to middle Cambrian	EPMA
533	1148-10	2010LHA150	12	0.0253	-0.00469636	2.17818	1.73471	0.0299964	0.443478	length	N. Yukon	Slats Creek	early to middle Cambrian	EPMA
534	1148-10	2010LHA150	13	0.1399	0.209629	2.32794	2.43267	0.0697287	0.104726	length	N. Yukon	Slats Creek	early to middle Cambrian	EPMA
535	1148-10	2010LHA150	14	0.0121	-0.0523074	2.14823	1.57966	0.0644074	0.568574	length	N. Yukon	Slats Creek	early to middle Cambrian	EPMA
536	1148-10	2010LHA150	15	0.0398	-0.00982405	2.05838	1.71801	0.049624	0.340369	length	N. Yukon	Slats Creek	early to middle Cambrian	EPMA
537	1148-10	2010LHA150	16	0.0173	-0.0205588	1.87866	1.68305	0.0378588	0.195615	length	N. Yukon	Slats Creek	early to middle Cambrian	EPMA
538	1148-10	2010LHA150	17	0.1478	0.208673	2.37786	2.42956	0.0608727	0.0516931	length	N. Yukon	Slats Creek	early to middle Cambrian	EPMA
539	1148-10	2010LHA150	1	0.111	0.138025	2.01844	2.19949	0.0270246	0.181047	length	N. Yukon	Slats Creek	early to middle Cambrian	EPMA
540	1148-10	2010LHA150	2	0.0097	-0.0261755	1.92858	1.66476	0.0358755	0.263826	length	N. Yukon	Slats Creek	early to middle Cambrian	EPMA
541	1148-10	2010LHA150	3	0.0119	-0.0347273	2.30798	1.63691	0.0466273	0.671068	length	N. Yukon	Slats Creek	early to middle Cambrian	EPMA
542	1148-10	2010LHA150	4	0.1378	0.211535	1.9186	2.43888	0.0737347	0.520277	length	N. Yukon	Slats Creek	early to middle Cambrian	EPMA
543	1148-10	2010LHA150	5	0.0232	-0.0490023	1.88865	1.59042	0.0722023	0.298227	length	N. Yukon	Slats Creek	early to middle Cambrian	EPMA
544	1148-10	2010LHA150	6	0.0226	0.0491333	1.88865	1.91001	0.0265333	0.0213578	length	N. Yukon	Slats Creek	early to middle Cambrian	EPMA
545	1148-10	2010LHA150	7	0.386	0.380111	2.49767	2.98786	0.0058887	0.490187	length	N. Yukon	Slats Creek	early to middle Cambrian	EPMA
546	1148-10	2010LHA150	8	0.0252	0.0639	2.28801	1.95809	0.0387	0.329913	length	N. Yukon	Slats Creek	early to middle Cambrian	EPMA
547	1148-10	2010LHA150	9	0.0069	0.0812346	2.23809	2.01455	0.0743346	0.223542	length	N. Yukon	Slats Creek	early to middle Cambrian	EPMA
548	1148-10	2010LHA150	10	0.0903	0.125422	1.93857	2.15844	0.0351217	0.219876	length	N. Yukon	Slats Creek	early to middle Cambrian	EPMA
549	1148-10	2010LHA150	11	0.1044	0.116675	1.92858	2.12996	0.012275	0.201376	length	N. Yukon	Slats Creek	early to middle Cambrian	EPMA
550	1148-10	2010LHA150	12	0.0551	0.157177	2.62746	2.26186	0.102077	0.365606	length	N. Yukon	Slats Creek	early to middle Cambrian	EPMA
551	1148-10	2010LHA150	13	0.0422	0.101569	2.39783	2.08077	0.0593693	0.317064	length	N. Yukon	Slats Creek	early to middle Cambrian	EPMA
552	1148-10	2010LHA150	14	0.007	0.0764545	1.88865	1.99898	0.0694545	0.110331	length	N. Yukon	Slats Creek	early to middle Cambrian	EPMA
553	1148-10	2010LHA150	15	0.0261	-0.014395	1.71892	1.70312	0.040495	0.0157981	length	N. Yukon	Slats Creek	early to middle Cambrian	EPMA
554	1148-10	2010LHA150	16	0.0094	-0.0440874	2.01844	1.60643	0.0534874	0.412014	length	N. Yukon	Slats Creek	early to middle Cambrian	EPMA
555	1148-10	2010LHA150	17	0.1234	0.220765	2.57754	2.46894	0.0973653	0.108607	length	N. Yukon	Slats Creek	early to middle Cambrian	EPMA
556	1148-10	2010LHA150	18	0.233	0.241392	2.55758	2.53611	0.00839182	0.0214669	length	N. Yukon	Slats Creek	early to middle Cambrian	EPMA
557	1148-10	2010LHA150	19	0.1365	0.193308	2.69735	2.37952	0.0568081	0.317831	length	N. Yukon	Slats Creek	early to middle Cambrian	EPMA
558	1148-10	2010LHA150	20	0.0125	-0.0369698	1.68897	1.62961	0.0494698	0.0593625	length	N. Yukon	Slats Creek	early to middle Cambrian	EPMA
559	1148-10	2010LHA150	21	0.0708	0.333929	1.8587	2.83746	0.263129	0.978765	length	N. Yukon	Slats Creek	early to middle Cambrian	EPMA
560	1148-10	2010LHA150	22	0.1194	0.191327	2.49767	2.37307	0.0719273	0.124602	length	N. Yukon	Slats Creek	early to middle Cambrian	EPMA
561	1148-10	2010LHA150	23	0.0405	0.0204272	2.13825	1.81652	0.0200728	0.321725	length	N. Yukon	Slats Creek	early to middle Cambrian	EPMA
562	1148-10	2010LHA150	24	0.0066	0.0181455	1.86868	1.80909	0.0115455	0.059588	length	N. Yukon	Slats Creek	early to middle Cambrian	EPMA
563	1148-10	2010LHA150	25	0.0032	-0.00469636	1.99847	1.73471	0.00789636	0.263766	length	N. Yukon	Slats Creek	early to middle Cambrian	EPMA
564	1148-10	2010LHA150	26	0.2345	0.207523	3.09671	2.42581	0.0269769	0.670899	length	N. Yukon	Slats Creek	early to middle Cambrian	EPMA
565	1148-10	2010LHA150	27	0.1765	0.188939	2.53761	2.36529	0.0124393	0.172314	length	N. Yukon	Slats Creek	early to middle Cambrian	EPMA
566	1148-10	2010LHA150	28	0.2296	0.238525	2.92698	2.52677	0.00892517	0.40021	length	N. Yukon	Slats Creek	early to middle Cambrian	EPMA
567	1148-10	2010LHA150	29	0.0538	0.0232641	2.44775	1.82576	0.0305359	0.621991	length	N. Yukon	Slats Creek	early to middle Cambrian	EPMA
568	1148-10	2010LHA150	30	0.0821	0.260473	2.26804	2.59825	0.178373	0.330209	length	N. Yukon	Slats Creek	early to middle Cambrian	EPMA
569	1148-10	2010LHA150	31	0.0857	0.0680361	2.04839	1.97156	0.0176639	0.0768278	length	N. Yukon	Slats Creek	early to middle Cambrian	EPMA
570	1148-11	2010LHA151	1	0.001	-0.0573085	2.24	1.56337	0.0583085	0.676629	age	N. Yukon	Slats Creek	early to middle Cambrian	EPMA
571	1148-11	2010LHA151	2	0.0096	-0.0427853	2.09	1.61067	0.0523853	0.479333	age	N. Yukon	Slats Creek	early to middle Cambrian	EPMA
572	1148-11	2010LHA151	3	0.0524	-0.0224237	1.88	1.67698	0.0748237	0.203024	age	N. Yukon	Slats Creek	early to middle Cambrian	EPMA
573	1148-11	2010LHA151	4	0.0006	-0.0113428	1.97	1.71306	0.0119428	0.256939	age	N. Yukon	Slats Creek	early to middle Cambrian	EPMA
574	1148-11	2010LHA151	5	0.0022	-0.0376124	2.15	1.62751	0.0398124	0.522487	age	N. Yukon	Slats Creek	early to middle Cambrian	EPMA
575	1148-11	2010LHA151	7	0.0026	-0.0318595	2.25	1.64625	0.0344595	0.603753	age	N. Yukon	Slats Creek	early to middle Cambrian	EPMA
576	1148-11	2010LHA151	8	0.0561	-0.00740411	1.79	1.72589	0.0635041	0.064112	age	N. Yukon	Slats Creek	early to middle Cambrian	EPMA
577	1148-11	2010LHA151	9	0.0088	0.00363032	2.01	1.76182	0.00516968	0.248178	age	N. Yukon	Slats Creek	early to middle Cambrian	EPMA
578	1148-11	2010LHA151	10	0.0036	-0.0309074	2.25	1.64935	0.0345074	0.600652	age	N. Yukon	Slats Creek	early to middle Cambrian	EPMA
579	1148-11	2010LHA151	11	0.0048	-0.0116471	2.1	1.71207	0.0164471	0.38793	age	N. Yukon	Slats Creek	early to middle Cambrian	EPMA
580	1148-11	2010LHA151	12	0.0013	-0.0576438	1.81	1.56228	0.0589438	0.247721	age	N. Yukon	Slats Creek	early to middle Cambrian	EPMA
581	1148-11	2010LHA151	13	0.0219	0.00421953	2.54	1.76374	0.0176805	0.776259	age	N. Yukon	Slats Creek	early to middle Cambrian	EPMA
582	1148-11	2010LHA151	14	0.0279	-0.00649981	1.92	1.72883	0.0343998	0.191167	age	N. Yukon	Slats Creek	early to middle Cambrian	EPMA
583	1148-11	2010LHA151	15	0.0345	-0.0205588	2.11	1.68305	0.0550588	0.426951	age	N. Yukon	Slats Creek	early to middle Cambrian	EPMA
584	1148-11	2010LHA151	16	0.0165	0.151814	2.1	2.24439	0.135314	0.144393	age	N. Yukon	Slats Creek	early to middle Cambrian	EPMA
585	1148-11	2010LHA151	17	0.0318	-0.0113428	1.69	1.71306	0.0431428	0.0230614	age	N. Yukon	Slats Creek	early to middle Cambrian	EPMA
586	1148-11	2010LHA151	18	0.0114	-0.0261755	2.13	1.66476	0.0375755	0.465242	age	N. Yukon	Slats Creek	early to middle Cambrian	EPMA
587	1148-11	2010LHA151	19	0.0088	-0.0573085	1.71	1.56337	0.0661085	0.146629	age	N. Yukon	Slats Creek	early to middle Cambrian	EPMA
588	1148-11	2010LHA151	20	0.0088	-0.0705638	1.87	1.5202	0.0793638	0.349796	age	N. Yukon	Slats Creek	early to middle Cambrian	EPMA
589	1148-11	2010LHA151	21	0.007	-0.0440874	1.94	1.60643	0.0510874	0.333574	age	N. Yukon	Slats Creek	early to middle Cambrian	EPMA
590	1148-11	2010LHA151	22	0.0256	-0.0392229	2.12	1.62227	0.0648229	0.497732	age	N. Yukon	Slats Creek	early to middle Cambrian	EPMA
591	1148-11	2010LHA151	23	0.0078	-0.0305905	1.97	1.65038	0.0383905	0.31962	age	N. Yukon	Slats Creek	early to middle Cambrian	EPMA
592	1148-11	2010LHA151	24	0.026	-0.029009	1.9	1.65553	0.055009	0.24447	age	N. Yukon	Slats Creek	early to middle Cambrian	EPMA
593	1148-11	2010LHA151	1	0.0015	-0.0606722	1.94	1.55242	0.0621722	0.387583	age	N. Yukon	Slats Creek	early to middle Cambrian	EPMA
594	1148-11	2010LHA151	2	0.0125	-0.0230469	2.1	1.67495	0.0355469	0.425054	age	N. Yukon	Slats Creek	early to middle Cambrian	EPMA
595	1148-11	2010LHA151	3	0.0744	0.0693212	2.2	1.97575	0.00507876	0.224251	age	N. Yukon	Slats Creek	early to middle Cambrian	EPMA
596	1148-11	2010LHA151	4	0.0076	-0.048673	1.75	1.59149	0.056273	0.158507	age	N. Yukon	Slats Creek	early to middle Cambrian	EPMA
597	1148-11	2010LHA151	5	0.0043	-0.0529711	2	1.5775	0.0572711	0.422504	age	N. Yukon	Slats Creek	early to middle Cambrian	EPMA
598	1148-11	2010LHA151	6	0.0062	-0.0331319	1.7	1.6421	0.0393319	0.0578964	age	N. Yukon	Slats Creek	early to middle Cambrian	EPMA
599	1148-11	2010LHA151	7	0.0017	0.0280482	2.26	1.84134	0.0263482	0.418659	age	N. Yukon	Slats Creek	early to middle Cambrian	EPMA
600	1148-11	2010LHA151	8	0.0181	-0.0437615	1.87	1.60749	0.0618615	0.262512	age	N. Yukon	Slats Creek	early to middle Cambrian	EPMA
601	1148-11	2010LHA151	9	0.0397	-0.014395	2.11	1.70312	0.054095	0.406878	age	N. Yukon	Slats Creek	early to middle Cambrian	EPMA
602	1148-11	2010LHA151	10	0.0069	-0.0715989	1.44	1.51683	0.0784989	0.0768332	age	N. Yukon	Slats Creek	early to middle Cambrian	EPMA
603	1148-11	2010LHA151	11	0.0312	-0.0283779	2.12	1.65759	0.0595779	0.462415	age	N. Yukon	Slats Creek	early to middle Cambrian	EPMA
604	1148-11	2010LHA151	12	0.007	-0.0596606	2.16	1.55571	0.0666606	0.604289	age	N. Yukon	Slats Creek	early to middle Cambrian	EPMA
605	1148-11	2010LHA151	13	0.0034	-0.0395457	1.69	1.62122	0.0429457	0.0687831	age	N. Yukon	Slats Creek	early to middle Cambrian	EPMA
606	1148-11	2010LHA151	14	0.0027	-0.0553017	1.82	1.56991	0.0580017	0.250094	age	N. Yukon	Slats Creek	early to middle Cambrian	EPMA
607	1148-11	2010LHA151	15	0.0286	0.0633805	2.26	1.9564	0.0347805	0.303597	age	N. Yukon	Slats Creek	early to middle Cambrian	EPMA
608	1148-11	2010LHA151	16	0.0095	-0.0128664	1.81	1.7081	0.0223664	0.1019	age	N. Yukon	Slats Creek	early to middle Cambrian	EPMA
609	1148-11	2010LHA151	1	0.0086	-0.0543015	1.88	1.57316	0.0629015	0.306837	length	N. Yukon	Slats Creek	early to middle Cambrian	EPMA
610	1148-11	2010LHA151	2	0.0058	-0.0286933	1.85	1.65656	0.0344933	0.193442	length	N. Yukon	Slats Creek	early to middle Cambrian	EPMA
611	1148-11	2010LHA151	3	0.032	-0.0171588	1.88	1.69412	0.0491588	0.185879	length	N. Yukon	Slats Creek	early to middle Cambrian	EPMA
612	1148-11	2010LHA151	4	0.0053	-0.00831014	2	1.72294	0.0136101	0.277063	length	N. Yukon	Slats Creek	early to middle Cambrian	EPMA
613	1148-11	2010LHA151	5	0.1056	0.0266461	2.05	1.83678	0.0789539	0.213225	length	N. Yukon	Slats Creek	early to middle Cambrian	EPMA
614	1148-11	2010LHA151	6	0.0189	-0.00982405	2.1	1.71801	0.028724	0.381993	length	N. Yukon	Slats Creek	early to middle Cambrian	EPMA
615	1148-11	2010LHA151	7	0.0095	0.00451386	2.02	1.7647	0.00498614	0.2553	length	N. Yukon	Slats Creek	early to middle Cambrian	EPMA
616	1148-11	2010LHA151	8	0.032	-0.010431	1.63	1.71603	0.042431	0.0860308	length	N. Yukon	Slats Creek	early to middle Cambrian	EPMA
617	1148-11	2010LHA151	9	0.002	0.00598278	2.08	1.76948	0.00398278	0.310517	length	N. Yukon	Slats Creek	early to middle Cambrian	EPMA
618	1148-11	2010LHA151	10	0	-0.0305905	1.81	1.65038	0.0305905	0.15962	length	N. Yukon	Slats Creek	early to middle Cambrian	EPMA
619	1148-11	2010LHA151	11	0.0586	0.171465	1.82	2.30839	0.112865	0.488386	length	N. Yukon	Slats Creek	early to middle Cambrian	EPMA
620	1148-11	2010LHA151	12	0.0055	-0.0533034	1.85	1.57641	0.0588034	0.273586	length	N. Yukon	Slats Creek	early to middle Cambrian	EPMA
621	1148-11	2010LHA151	13	0.0148	0.140903	3.43	2.20886	0.126103	1.22114	length	N. Yukon	Slats Creek	early to middle Cambrian	EPMA
622	1148-11	2010LHA151	14	0	-0.0153144	1.97	1.70013	0.0153144	0.269873	length	N. Yukon	Slats Creek	early to middle Cambrian	EPMA
623	1148-11	2010LHA151	15	0.0699	0.174148	1.92	2.31712	0.104248	0.397124	length	N. Yukon	Slats Creek	early to middle Cambrian	EPMA
624	1148-11	2010LHA151	1	0.0437	-0.0137829	2.08	1.70511	0.0574829	0.374885	length	N. Yukon	Slats Creek	early to middle Cambrian	EPMA
625	1148-11	2010LHA151	2	0	-0.0583151	1.88	1.56009	0.0583151	0.319907	length	N. Yukon	Slats Creek	early to middle Cambrian	EPMA
626	1148-11	2010LHA151	3	0.06	-0.0271181	2.08	1.66169	0.0871181	0.418312	length	N. Yukon	Slats Creek	early to middle Cambrian	EPMA
627	1148-11	2010LHA151	4	0.0302	0.0100717	2.25	1.7828	0.0201283	0.467201	length	N. Yukon	Slats Creek	early to middle Cambrian	EPMA
628	1148-11	2010LHA151	5	0.1269	0.0623397	2.15	1.95301	0.0645603	0.196987	length	N. Yukon	Slats Creek	early to middle Cambrian	EPMA
629	1148-11	2010LHA151	6	0.015	0.0100717	2.27	1.7828	0.00492826	0.487201	length	N. Yukon	Slats Creek	early to middle Cambrian	EPMA
630	1148-11	2010LHA151	7	0.0583	0.137358	2.17	2.19732	0.0790579	0.0273154	length	N. Yukon	Slats Creek	early to middle Cambrian	EPMA
631	1148-11	2010LHA151	8	0.007	-0.0503215	2	1.58612	0.0573215	0.413876	length	N. Yukon	Slats Creek	early to middle Cambrian	EPMA
632	1148-11	2010LHA151	9	0.0047	-0.00982405	1.94	1.71801	0.014524	0.221993	length	N. Yukon	Slats Creek	early to middle Cambrian	EPMA
633	1148-11	2010LHA151	10	0.0012	-0.0473583	1.71	1.59577	0.0485583	0.114226	length	N. Yukon	Slats Creek	early to middle Cambrian	EPMA
634	1148-11	2010LHA151	11	0.1124	0.124737	1.75	2.15621	0.012337	0.406215	length	N. Yukon	Slats Creek	early to middle Cambrian	EPMA
635	1148-12	2010LHA152	2	0.0285	-0.0171588	1.83	1.69412	0.0456588	0.135879	age	N. Yukon	Illtyd	early Cambrian	EPMA
636	1148-12	2010LHA152	3	0.0167	-0.0334506	2.05	1.64107	0.0501506	0.408934	age	N. Yukon	Illtyd	early Cambrian	EPMA
637	1148-12	2010LHA152	4	0.0006	-0.0437615	2.27	1.60749	0.0443615	0.662512	age	N. Yukon	Illtyd	early Cambrian	EPMA
638	1148-12	2010LHA152	5	0.0015	-0.0681572	1.72	1.52804	0.0696572	0.191959	age	N. Yukon	Illtyd	early Cambrian	EPMA
639	1148-12	2010LHA152	6	0.0049	-0.0747179	1.98	1.50668	0.0796179	0.473324	age	N. Yukon	Illtyd	early Cambrian	EPMA
640	1148-12	2010LHA152	7	0.0038	-0.0533034	2.09	1.57641	0.0571034	0.513586	age	N. Yukon	Illtyd	early Cambrian	EPMA
641	1148-12	2010LHA152	8	0.0231	-0.0233588	2.03	1.67393	0.0464588	0.35607	age	N. Yukon	Illtyd	early Cambrian	EPMA
642	1148-12	2010LHA152	9	0.0017	-0.0447398	1.96	1.6043	0.0464398	0.355698	age	N. Yukon	Illtyd	early Cambrian	EPMA
643	1148-12	2010LHA152	10	0	-0.0643999	1.85	1.54028	0.0643999	0.309723	age	N. Yukon	Illtyd	early Cambrian	EPMA
644	1148-12	2010LHA152	11	0.0024	-0.0661041	2.05	1.53473	0.0685041	0.515273	age	N. Yukon	Illtyd	early Cambrian	EPMA
645	1148-12	2010LHA152	12	0.003	-0.0573085	1.84	1.56337	0.0603085	0.276629	age	N. Yukon	Illtyd	early Cambrian	EPMA
646	1148-12	2010LHA152	13	0.0016	-0.0559697	1.69	1.56773	0.0575697	0.122269	age	N. Yukon	Illtyd	early Cambrian	EPMA
647	1148-12	2010LHA152	14	0.0222	-0.0171588	1.95	1.69412	0.0393588	0.255879	age	N. Yukon	Illtyd	early Cambrian	EPMA
648	1148-12	2010LHA152	15	0.0035	-0.0647403	2.2	1.53917	0.0682403	0.660831	age	N. Yukon	Illtyd	early Cambrian	EPMA
649	1148-12	2010LHA152	16	0.0008	-0.0499914	1.58	1.5872	0.0507914	0.00719964	age	N. Yukon	Illtyd	early Cambrian	EPMA
650	1148-12	2010LHA152	17	0.0041	-0.0405152	1.79	1.61806	0.0446152	0.171941	age	N. Yukon	Illtyd	early Cambrian	EPMA
651	1148-12	2010LHA152	18	0.0002	-0.0747179		1.50668	0.0749179		age	N. Yukon	Illtyd	early Cambrian	EPMA
652	1148-12	2010LHA152	19	0	-0.0796108	1.64	1.49074	0.0796108	0.149258	age	N. Yukon	Illtyd	early Cambrian	EPMA
653	1148-12	2010LHA152	1	0	-0.0496614	1.85	1.58827	0.0496614	0.261726	age	N. Yukon	Illtyd	early Cambrian	EPMA
654	1148-12	2010LHA152	3	0.0011	-0.0633804	1.98	1.5436	0.0644804	0.436403	age	N. Yukon	Illtyd	early Cambrian	EPMA
655	1148-12	2010LHA152	4	0.001	-0.0418111	2.28	1.61384	0.0428111	0.666161	age	N. Yukon	Illtyd	early Cambrian	EPMA
656	1148-12	2010LHA152	5	0.0017	-0.035047	2.33	1.63587	0.036747	0.694133	age	N. Yukon	Illtyd	early Cambrian	EPMA
657	1148-12	2010LHA152	6	0.0788	0.13199	1.82	2.17983	0.05319	0.359834	age	N. Yukon	Illtyd	early Cambrian	EPMA
658	1148-12	2010LHA152	7	0.0029	-0.0647403	1.85	1.53917	0.0676403	0.310831	age	N. Yukon	Illtyd	early Cambrian	EPMA
659	1148-12	2010LHA152	8	0.0028	-0.0785581	1.87	1.49417	0.0813581	0.37583	age	N. Yukon	Illtyd	early Cambrian	EPMA
660	1148-12	2010LHA152	9	0.0037	-0.080314	1.59	1.48845	0.084014	0.101548	age	N. Yukon	Illtyd	early Cambrian	EPMA
661	1148-12	2010LHA152	10	0.0004	-0.0543015	2.58	1.57316	0.0547015	1.00684	age	N. Yukon	Illtyd	early Cambrian	EPMA
662	1148-12	2010LHA152	11	0.0002	-0.0698749	1.59	1.52245	0.0700749	0.0675525	age	N. Yukon	Illtyd	early Cambrian	EPMA
663	1148-12	2010LHA152	12	0.0134	-0.048673	1.87	1.59149	0.062073	0.278507	age	N. Yukon	Illtyd	early Cambrian	EPMA
664	1148-12	2010LHA152	13	0	-0.0603347	1.99	1.55352	0.0603347	0.436484	age	N. Yukon	Illtyd	early Cambrian	EPMA
665	1148-12	2010LHA152	14	0.0044	-0.0499914	1.71	1.5872	0.0543914	0.1228	age	N. Yukon	Illtyd	early Cambrian	EPMA
666	1148-12	2010LHA152	15	0.003	-0.0556356	2.41	1.56882	0.0586356	0.841181	age	N. Yukon	Illtyd	early Cambrian	EPMA
667	1148-12	2010LHA152	16	0	-0.0312246	2.11	1.64831	0.0312246	0.461685	age	N. Yukon	Illtyd	early Cambrian	EPMA
668	1148-12	2010LHA152	17	0.0127	-0.0392229	2.02	1.62227	0.0519229	0.397732	age	N. Yukon	Illtyd	early Cambrian	EPMA
669	1148-12	2010LHA152	18	0.0022	-0.063041		1.5447	0.065241		age	N. Yukon	Illtyd	early Cambrian	EPMA
670	1148-12	2010LHA152	19	0.0353	0.0155653	1.91	1.80069	0.0197347	0.109311	age	N. Yukon	Illtyd	early Cambrian	EPMA
671	1148-12	2010LHA152	20	0	-0.0480152		1.59364	0.0480152		age	N. Yukon	Illtyd	early Cambrian	EPMA
672	1148-12	2010LHA152	3	0.115	-0.00379719	1.96	1.73763	0.118797	0.222366	age	N. Yukon	Illtyd	early Cambrian	ICPMS
673	1148-12	2010LHA152	5	0.1385	-0.00341048	2.42778	1.73889	0.14191	0.68889	age	N. Yukon	Illtyd	early Cambrian	ICPMS
674	1148-12	2010LHA152	6	0.1468	0.0254545	2.1083	1.83289	0.121346	0.275402	age	N. Yukon	Illtyd	early Cambrian	ICPMS
675	1148-12	2010LHA152	7	0.0788	-0.029641	2.34	1.65347	0.108441	0.686528	age	N. Yukon	Illtyd	early Cambrian	ICPMS
676	1148-12	2010LHA152	8	0.0666	-0.00427294	1.75886	1.73608	0.0708729	0.0227711	age	N. Yukon	Illtyd	early Cambrian	ICPMS
677	1148-12	2010LHA152	9	0.0831	-0.0251245	1.9186	1.66818	0.108225	0.25042	age	N. Yukon	Illtyd	early Cambrian	ICPMS
678	1148-12	2010LHA152	11	0.146	0.0392729	2.1083	1.87789	0.106727	0.230401	age	N. Yukon	Illtyd	early Cambrian	ICPMS
679	1148-12	2010LHA152	12	0.1455	0.0143149	1.78881	1.79662	0.131185	0.00780942	age	N. Yukon	Illtyd	early Cambrian	ICPMS
680	1148-12	2010LHA152	14	0.1021	-0.027469	1.96852	1.66055	0.129569	0.307975	age	N. Yukon	Illtyd	early Cambrian	ICPMS
681	1148-12	2010LHA152	17	0.1876	0.0569046	1.92858	1.93531	0.130695	0.00672975	age	N. Yukon	Illtyd	early Cambrian	ICPMS
682	1148-12	2010LHA152	18	0.0724	-0.0256654	1.7289	1.66642	0.0980654	0.0624851	age	N. Yukon	Illtyd	early Cambrian	ICPMS
683	1148-12	2010LHA152	19	0.2388	0.0602049	1.87866	1.94606	0.178595	0.0673973	age	N. Yukon	Illtyd	early Cambrian	ICPMS
684	1148-12	2010LHA152	20	0	-0.0661041	2.06	1.53473	0.0661041	0.525273	age	N. Yukon	Illtyd	early Cambrian	ICPMS
685	1148-12	2010LHA152	21	0	-0.0748045	1.48929	1.50639	0.0748045	0.017106	age	N. Yukon	Illtyd	early Cambrian	ICPMS
686	1148-12	2010LHA152	22	0.0251	-0.0620274	2.20814	1.548	0.0871274	0.660132	age	N. Yukon	Illtyd	early Cambrian	ICPMS
687	1148-12	2010LHA152	23	0	-0.0772171	2.01844	1.49854	0.0772171	0.519903	age	N. Yukon	Illtyd	early Cambrian	ICPMS
688	1148-12	2010LHA152	25	0.0111	-0.0553017	1.33	1.56991	0.0664017	0.239906	age	N. Yukon	Illtyd	early Cambrian	ICPMS
689	1148-12	2010LHA152	27	0	-0.0761212	1.93857	1.50211	0.0761212	0.436462	age	N. Yukon	Illtyd	early Cambrian	ICPMS
690	1148-12	2010LHA152	28	0.3894	0.128894		2.16975	0.260506		age	N. Yukon	Illtyd	early Cambrian	ICPMS
691	1148-12	2010LHA152	31	0	-0.0734564	1.90862	1.51078	0.0734564	0.397832	age	N. Yukon	Illtyd	early Cambrian	ICPMS
692	1148-12	2010LHA152	32	1.2417	0.314106	1.83	2.77291	0.927594	0.942908	age	N. Yukon	Illtyd	early Cambrian	ICPMS
693	1148-12	2010LHA152	35	0.0466	-0.016395	2.00846	1.69661	0.062995	0.311847	age	N. Yukon	Illtyd	early Cambrian	ICPMS
694	1148-12	2010LHA152	37	0.0245	-0.0242271	1.68897	1.6711	0.0487271	0.0178652	age	N. Yukon	Illtyd	early Cambrian	ICPMS
695	1148-12	2010LHA152	39	0.1101	-0.0173901	1.71	1.69337	0.12749	0.0166322	age	N. Yukon	Illtyd	early Cambrian	ICPMS
696	1148-12	2010LHA152	40	0.1332	0.0771415	1.86868	2.00122	0.0560585	0.132537	age	N. Yukon	Illtyd	early Cambrian	ICPMS
697	1148-12	2010LHA152	1	0.0479	0.089916	1.85	2.04282	0.042016	0.192817	length	N. Yukon	Illtyd	early Cambrian	EPMA
698	1148-12	2010LHA152	2	0.0176	-0.0553017	2.19	1.56991	0.0729017	0.620094	length	N. Yukon	Illtyd	early Cambrian	EPMA
699	1148-12	2010LHA152	3	0.001	-0.0678144	1.61	1.52916	0.0688144	0.0808423	length	N. Yukon	Illtyd	early Cambrian	EPMA
700	1148-12	2010LHA152	4	0.0061	-0.048344	2.03	1.59256	0.054444	0.437436	length	N. Yukon	Illtyd	early Cambrian	EPMA
701	1148-12	2010LHA152	5	0.005	-0.0799623	2.45	1.4896	0.0849623	0.960403	length	N. Yukon	Illtyd	early Cambrian	EPMA
702	1148-12	2010LHA152	1	0.0853	0.132664	2.72	2.18203	0.0473643	0.53797	length	N. Yukon	Illtyd	early Cambrian	EPMA
703	1148-12	2010LHA152	2	0.0632	0.123823	2.01	2.15324	0.0606225	0.143237	length	N. Yukon	Illtyd	early Cambrian	EPMA
704	1148-12	2010LHA152	3	0	-0.0688436	1.75	1.52581	0.0688436	0.224194	length	N. Yukon	Illtyd	early Cambrian	EPMA
705	1148-12	2010LHA152	4	0.0407	-0.029641	1.69	1.65347	0.070341	0.0365279	length	N. Yukon	Illtyd	early Cambrian	EPMA
706	1148-12	2010LHA152	1	0.0915	0.0185027	2.06836	1.81026	0.0729973	0.258105	length	N. Yukon	Illtyd	early Cambrian	ICPMS
707	1148-12	2010LHA152	3	0.0983	0.00156734	1.9785	1.7551	0.0967327	0.2234	length	N. Yukon	Illtyd	early Cambrian	ICPMS
708	1148-12	2010LHA152	4	0.1255	0.00375323	2.04839	1.76222	0.121747	0.286169	length	N. Yukon	Illtyd	early Cambrian	ICPMS
709	1148-12	2010LHA152	5	0.0986	-0.00610668	2.50766	1.73011	0.104707	0.777543	length	N. Yukon	Illtyd	early Cambrian	ICPMS
710	1148-12	2010LHA152	6	0	-0.0446938	1.80878	1.60445	0.0446938	0.204324	length	N. Yukon	Illtyd	early Cambrian	ICPMS
711	1148-12	2010LHA152	7	0.1372	0.0980296	2.15822	2.06924	0.0391704	0.088976	length	N. Yukon	Illtyd	early Cambrian	ICPMS
712	1148-12	2010LHA152	8	0.0502	0.0137401	2.14823	1.79475	0.0364599	0.353486	length	N. Yukon	Illtyd	early Cambrian	ICPMS
713	1148-12	2010LHA152	9	0	-0.079081	2.19815	1.49247	0.079081	0.705685	length	N. Yukon	Illtyd	early Cambrian	ICPMS
714	1148-12	2010LHA152	10	0.0169	-0.0524586	2.18817	1.57916	0.0693586	0.609003	length	N. Yukon	Illtyd	early Cambrian	ICPMS
715	1148-07	2010LHA161A1	1	0.0417	0.127243	2.37	2.16437	0.0855427	0.205625	age	N. Yukon	Rat River	Lower Cretaceous (Aptian)	EPMA
716	1148-07	2010LHA161A1	2	0.0241	0.0670054	2.02	1.96821	0.0429054	0.0517922	age	N. Yukon	Rat River	Lower Cretaceous (Aptian)	EPMA
717	1148-07	2010LHA161A1	3	0.0148	0.0274879	2.1	1.83952	0.0126879	0.260484	age	N. Yukon	Rat River	Lower Cretaceous (Aptian)	EPMA
718	1148-07	2010LHA161A1	4	0.0029	-0.0193196	1.9	1.68708	0.0222196	0.212916	age	N. Yukon	Rat River	Lower Cretaceous (Aptian)	EPMA
719	1148-07	2010LHA161A1	5	0.0566	0.0913884	2.15	2.04761	0.0347884	0.102387	age	N. Yukon	Rat River	Lower Cretaceous (Aptian)	EPMA
720	1148-07	2010LHA161A1	6	0.0017	-0.0271181	2.11	1.66169	0.0288181	0.448312	age	N. Yukon	Rat River	Lower Cretaceous (Aptian)	EPMA
721	1148-07	2010LHA161A1	7	0.0161	0.0170005	1.85	1.80536	0.000900457	0.0446368	age	N. Yukon	Rat River	Lower Cretaceous (Aptian)	EPMA
722	1148-07	2010LHA161A1	8	0.1184	0.138469	1.88	2.20093	0.0200686	0.320933	age	N. Yukon	Rat River	Lower Cretaceous (Aptian)	EPMA
723	1148-07	2010LHA161A1	9	0.0082	0.145953	2.25	2.22531	0.137753	0.024693	age	N. Yukon	Rat River	Lower Cretaceous (Aptian)	EPMA
724	1148-07	2010LHA161A1	10	0.005	0.0224148	1.77	1.823	0.0174148	0.0529955	age	N. Yukon	Rat River	Lower Cretaceous (Aptian)	EPMA
725	1148-07	2010LHA161A1	11	0.182	0.225407	2.51	2.48405	0.0434066	0.025948	age	N. Yukon	Rat River	Lower Cretaceous (Aptian)	EPMA
726	1148-07	2010LHA161A1	12	0.0213	-0.00921791	2.08	1.71998	0.0305179	0.360019	age	N. Yukon	Rat River	Lower Cretaceous (Aptian)	EPMA
727	1148-07	2010LHA161A1	13	0.046	0.083233	2.24	2.02105	0.037233	0.218946	age	N. Yukon	Rat River	Lower Cretaceous (Aptian)	EPMA
728	1148-07	2010LHA161A1	14	0.0612	0.0434751	1.94	1.89158	0.0177249	0.0484205	age	N. Yukon	Rat River	Lower Cretaceous (Aptian)	EPMA
729	1148-07	2010LHA161A1	15	0.3811	0.418275	2.58	3.11214	0.0371746	0.53214	age	N. Yukon	Rat River	Lower Cretaceous (Aptian)	EPMA
730	1148-07	2010LHA161A1	16	0.0205	0.0369249	2.27	1.87025	0.0164249	0.399752	age	N. Yukon	Rat River	Lower Cretaceous (Aptian)	EPMA
731	1148-07	2010LHA161A1	17	0.0091	0.05446	2.34	1.92735	0.04536	0.412647	age	N. Yukon	Rat River	Lower Cretaceous (Aptian)	EPMA
732	1148-07	2010LHA161A1	18	0.0047	-0.0268037	2.22	1.66271	0.0315037	0.557288	age	N. Yukon	Rat River	Lower Cretaceous (Aptian)	EPMA
733	1148-07	2010LHA161A1	19	0.0652	0.141785	2.2	2.21173	0.0765852	0.0117334	age	N. Yukon	Rat River	Lower Cretaceous (Aptian)	EPMA
734	1148-07	2010LHA161A1	20	0.0037	0.0480607	2.21	1.90651	0.0443607	0.303487	age	N. Yukon	Rat River	Lower Cretaceous (Aptian)	EPMA
735	1148-07	2010LHA161A1	21	0.3564	0.370683	3.75	2.95716	0.0142835	0.792844	age	N. Yukon	Rat River	Lower Cretaceous (Aptian)	EPMA
736	1148-07	2010LHA161A1	22	0.0321	0.041846	2.31	1.88627	0.00974597	0.423726	age	N. Yukon	Rat River	Lower Cretaceous (Aptian)	EPMA
737	1148-07	2010LHA161A1	23	0	0.05393	1.83	1.92563	0.05393	0.0956268	age	N. Yukon	Rat River	Lower Cretaceous (Aptian)	EPMA
738	1148-07	2010LHA161A1	24	0.0871	0.0360997	2.34	1.86756	0.0510003	0.472439	age	N. Yukon	Rat River	Lower Cretaceous (Aptian)	EPMA
739	1148-07	2010LHA161A1	25	0.0141	0.0391183	2.22	1.87739	0.0250183	0.342608	age	N. Yukon	Rat River	Lower Cretaceous (Aptian)	EPMA
740	1148-07	2010LHA161A1	26	0.0029	-0.0202487	1.74	1.68406	0.0231487	0.0559412	age	N. Yukon	Rat River	Lower Cretaceous (Aptian)	EPMA
741	1148-07	2010LHA161A1	28	0.0194	0.0118134	2.21	1.78847	0.00758657	0.421529	age	N. Yukon	Rat River	Lower Cretaceous (Aptian)	EPMA
742	1148-07	2010LHA161A1	29	0.0084	0.0904073	1.85	2.04442	0.0820073	0.194417	age	N. Yukon	Rat River	Lower Cretaceous (Aptian)	EPMA
743	1148-07	2010LHA161A1	30	0.0751	0.0385709	2.05	1.87561	0.0365291	0.174391	age	N. Yukon	Rat River	Lower Cretaceous (Aptian)	EPMA
744	1148-07	2010LHA161A1	31	0.0102	0.0161399	1.99	1.80256	0.00593988	0.187439	age	N. Yukon	Rat River	Lower Cretaceous (Aptian)	EPMA
745	1148-07	2010LHA161A1	32	0.0283	0.0792278	1.85	2.00801	0.0509278	0.158011	age	N. Yukon	Rat River	Lower Cretaceous (Aptian)	EPMA
746	1148-07	2010LHA161A1	33	0	0.0274879	1.85	1.83952	0.0274879	0.0104838	age	N. Yukon	Rat River	Lower Cretaceous (Aptian)	EPMA
747	1148-07	2010LHA161A1	34	0.0089	0.0288875	1.83	1.84407	0.0199875	0.0140742	age	N. Yukon	Rat River	Lower Cretaceous (Aptian)	EPMA
748	1148-07	2010LHA161A1	35	0.0909	0.0695779	2.01	1.97659	0.0213221	0.0334149	age	N. Yukon	Rat River	Lower Cretaceous (Aptian)	EPMA
749	1148-07	2010LHA161A1	36	0.3052	0.18854	2.59	2.36399	0.11666	0.226006	age	N. Yukon	Rat River	Lower Cretaceous (Aptian)	EPMA
750	1148-07	2010LHA161A1	37	0.0095	0.00861544	1.88	1.77806	0.000884558	0.101943	age	N. Yukon	Rat River	Lower Cretaceous (Aptian)	EPMA
751	1148-07	2010LHA161A1	39	0.0393	0.0908981	2.49	2.04602	0.0515981	0.443984	age	N. Yukon	Rat River	Lower Cretaceous (Aptian)	EPMA
752	1148-07	2010LHA161A1	40	0.0685	0.143984	2.15	2.21889	0.0754835	0.0688922	age	N. Yukon	Rat River	Lower Cretaceous (Aptian)	EPMA
753	1148-07	2010LHA161A1	1	0.0017	-0.0171588	2.05	1.69412	0.0188588	0.355879	length	N. Yukon	Rat River	Lower Cretaceous (Aptian)	EPMA
754	1148-07	2010LHA161A1	2	0.0092	-0.00289973	2.55	1.74056	0.0120997	0.809443	length	N. Yukon	Rat River	Lower Cretaceous (Aptian)	EPMA
755	1148-07	2010LHA161A1	3	0.0111	0.0685506	2.43	1.97324	0.0574506	0.45676	length	N. Yukon	Rat River	Lower Cretaceous (Aptian)	EPMA
756	1148-07	2010LHA161A1	4	0.0415	0.0682934	2.3	1.9724	0.0267934	0.327598	length	N. Yukon	Rat River	Lower Cretaceous (Aptian)	EPMA
757	1148-07	2010LHA161A1	5	0.0124	-0.035047	2.09	1.63587	0.047447	0.454133	length	N. Yukon	Rat River	Lower Cretaceous (Aptian)	EPMA
758	1148-07	2010LHA161A1	6	0.0098	0.0187169	2.28	1.81095	0.00891695	0.469047	length	N. Yukon	Rat River	Lower Cretaceous (Aptian)	EPMA
759	1148-07	2010LHA161A1	7	0.0063	0.220019	2.29	2.46651	0.213719	0.176505	length	N. Yukon	Rat River	Lower Cretaceous (Aptian)	EPMA
760	1148-07	2010LHA161A1	8	0.0207	-0.0119517	2.39	1.71108	0.0326517	0.678921	length	N. Yukon	Rat River	Lower Cretaceous (Aptian)	EPMA
761	1148-07	2010LHA161A1	9	0.0354	-0.00861254	2.31	1.72195	0.0440125	0.588047	length	N. Yukon	Rat River	Lower Cretaceous (Aptian)	EPMA
762	1148-07	2010LHA161A1	10	0.0366	0.03665	1.97	1.86935	4.99761e-05	0.100647	length	N. Yukon	Rat River	Lower Cretaceous (Aptian)	EPMA
763	1148-07	2010LHA161A1	11	0.0009	0.0091985	2.01	1.77996	0.0082985	0.230044	length	N. Yukon	Rat River	Lower Cretaceous (Aptian)	EPMA
764	1148-07	2010LHA161A1	12	0.0068	0.0950495	1.91	2.05954	0.0882495	0.149535	length	N. Yukon	Rat River	Lower Cretaceous (Aptian)	EPMA
765	1148-07	2010LHA161A1	13	0.182	0.201733	2.52	2.40696	0.0197328	0.113043	length	N. Yukon	Rat River	Lower Cretaceous (Aptian)	EPMA
766	1148-07	2010LHA161A1	14	0.0863	0.215324	2.69	2.45122	0.129024	0.238783	length	N. Yukon	Rat River	Lower Cretaceous (Aptian)	EPMA
767	1148-07	2010LHA161A1	15	0.0102	0.0896701	2.08	2.04202	0.0794701	0.0379831	length	N. Yukon	Rat River	Lower Cretaceous (Aptian)	EPMA
768	1148-07	2010LHA161A1	16	0.0111	0.0232641	2.05	1.82576	0.0121641	0.224239	length	N. Yukon	Rat River	Lower Cretaceous (Aptian)	EPMA
769	1148-07	2010LHA161A1	17	0.0073	0.0578906	2.05	1.93852	0.0505906	0.111475	length	N. Yukon	Rat River	Lower Cretaceous (Aptian)	EPMA
770	1148-07	2010LHA161A1	18	0.0367	-0.0334506	1.9	1.64107	0.0701506	0.258934	length	N. Yukon	Rat River	Lower Cretaceous (Aptian)	EPMA
771	1148-07	2010LHA161A1	19	0.0088	0.0612966	2.22	1.94962	0.0524966	0.270383	length	N. Yukon	Rat River	Lower Cretaceous (Aptian)	EPMA
772	1148-07	2010LHA161A1	20	0	0.0341687	2.6	1.86127	0.0341687	0.738727	length	N. Yukon	Rat River	Lower Cretaceous (Aptian)	EPMA
773	1148-07	2010LHA161A1	21	0.0106	0.0333387	2.26	1.85857	0.0227387	0.40143	length	N. Yukon	Rat River	Lower Cretaceous (Aptian)	EPMA
774	1148-07	2010LHA161A1	22	0.0162	0.00832364	2.1	1.77711	0.00787636	0.322893	length	N. Yukon	Rat River	Lower Cretaceous (Aptian)	EPMA
775	1148-07	2010LHA161A1	23	0.0285	0.067521	2.45	1.96989	0.039021	0.480113	length	N. Yukon	Rat River	Lower Cretaceous (Aptian)	EPMA
776	1148-07	2010LHA161A1	24	0.0315	0.0499361	1.9	1.91262	0.0184361	0.0126203	length	N. Yukon	Rat River	Lower Cretaceous (Aptian)	EPMA
777	1148-07	2010LHA161A1	25	0.0234	0.0869573	2.13	2.03318	0.0635573	0.0968174	length	N. Yukon	Rat River	Lower Cretaceous (Aptian)	EPMA
778	1148-07	2010LHA161A1	26	0.1122	0.0510044	2.6	1.9161	0.0611956	0.683901	length	N. Yukon	Rat River	Lower Cretaceous (Aptian)	EPMA
779	1148-07	2010LHA161A1	27	0.0353	0.0456385	1.99	1.89862	0.0103385	0.091375	length	N. Yukon	Rat River	Lower Cretaceous (Aptian)	EPMA
780	1148-07	2010LHA161A1	28	0.0098	-0.0218012	2.02	1.679	0.0316012	0.340997	length	N. Yukon	Rat River	Lower Cretaceous (Aptian)	EPMA
781	1148-07	2010LHA161A1	29	0.1699	0.232011	2.52	2.50556	0.0621112	0.0144396	length	N. Yukon	Rat River	Lower Cretaceous (Aptian)	EPMA
782	1148-07	2010LHA161A1	30	0.0463	0.160578	2.2	2.27293	0.114278	0.0729322	length	N. Yukon	Rat River	Lower Cretaceous (Aptian)	EPMA
783	1148-07	2010LHA161A1	31	0.0021	-0.0134772	1.97	1.70611	0.0155772	0.26389	length	N. Yukon	Rat River	Lower Cretaceous (Aptian)	EPMA
784	1148-07	2010LHA161A1	32	0.0601	0.0620791	2.23	1.95216	0.00197912	0.277835	length	N. Yukon	Rat River	Lower Cretaceous (Aptian)	EPMA
785	1148-07	2010LHA161A1	33	0.1	0.102288	2.62	2.08311	0.00228825	0.536891	length	N. Yukon	Rat River	Lower Cretaceous (Aptian)	EPMA
786	1148-07	2010LHA161A1	34	0.1601	0.0984414	2.21	2.07058	0.0616586	0.139419	length	N. Yukon	Rat River	Lower Cretaceous (Aptian)	EPMA
787	1148-07	2010LHA161A1	35	0	0.0243941	1.99	1.82944	0.0243941	0.160559	length	N. Yukon	Rat River	Lower Cretaceous (Aptian)	EPMA
788	1148-07	2010LHA161A1	36	0.0029	-0.0337694	1.95	1.64003	0.0366694	0.309972	length	N. Yukon	Rat River	Lower Cretaceous (Aptian)	EPMA
789	1148-07	2010LHA161A1	37	0.1282	0.217583	2.49	2.45857	0.0893832	0.0314254	length	N. Yukon	Rat River	Lower Cretaceous (Aptian)	EPMA
790	1148-07	2010LHA161A1	38	0.0531	0.0450986	2.28	1.89687	0.00800142	0.383133	length	N. Yukon	Rat River	Lower Cretaceous (Aptian)	EPMA
791	1148-07	2010LHA161A1	39	0.0057	-0.0398686	2.12	1.62017	0.0455686	0.499835	length	N. Yukon	Rat River	Lower Cretaceous (Aptian)	EPMA
792	1148-07	2010LHA161A1	40	0.0103	0.0238295	2.27	1.8276	0.0135295	0.442398	length	N. Yukon	Rat River	Lower Cretaceous (Aptian)	EPMA
793	1148-07	2010LHA161A1	41	0.0045	-0.0211796	1.98	1.68103	0.0256796	0.298973	length	N. Yukon	Rat River	Lower Cretaceous (Aptian)	EPMA
794	1148-07	2010LHA161A1	42	0.0097	-0.00230236	2.14	1.7425	0.0120024	0.397498	length	N. Yukon	Rat River	Lower Cretaceous (Aptian)	EPMA
795	1148-07	2010LHA161A1	43	0.0145	-0.00559723	2	1.73177	0.0200972	0.268228	length	N. Yukon	Rat River	Lower Cretaceous (Aptian)	EPMA
796	1148-07	2010LHA161A1	44	0.0077	-0.0122564	2.22	1.71009	0.0199564	0.509914	length	N. Yukon	Rat River	Lower Cretaceous (Aptian)	EPMA
797	1148-07	2010LHA161A1	45	0.0847	0.211535	2.94	2.43888	0.126835	0.501123	length	N. Yukon	Rat River	Lower Cretaceous (Aptian)	EPMA
798	1148-07	2010LHA161A1	46	0.0471	0.0610355	2.46	1.94877	0.0139355	0.511234	length	N. Yukon	Rat River	Lower Cretaceous (Aptian)	EPMA
799	1148-07	2010LHA161A1	47	0.0108	0.0195729	2.19	1.81374	0.00877287	0.37626	length	N. Yukon	Rat River	Lower Cretaceous (Aptian)	EPMA
800	1148-07	2010LHA161A1	48	0.0021	-0.00831014	1.95	1.72294	0.0104101	0.227063	length	N. Yukon	Rat River	Lower Cretaceous (Aptian)	EPMA
801	1148-07	2010LHA161A1	49	0.1354	0.121529	2.79	2.14577	0.0138714	0.644234	length	N. Yukon	Rat River	Lower Cretaceous (Aptian)	EPMA
802	1148-07	2010LHA161A1	50	0.0029	0.0126819	2.35	1.7913	0.00978188	0.558701	length	N. Yukon	Rat River	Lower Cretaceous (Aptian)	EPMA
803	1148-07	2010LHA161A1	51	0.0358	0.0274879	2.21	1.83952	0.0083121	0.370484	length	N. Yukon	Rat River	Lower Cretaceous (Aptian)	EPMA
804	1148-07	2010LHA161A1	52	0	0.0552539	2.96	1.92994	0.0552539	1.03006	length	N. Yukon	Rat River	Lower Cretaceous (Aptian)	EPMA
805	1148-07	2010LHA161A1	53	0.0019	0.00185829	2.4	1.75605	4.17103e-05	0.643948	length	N. Yukon	Rat River	Lower Cretaceous (Aptian)	EPMA
806	1148-07	2010LHA161A1	54	0.0016	0.215324	2.09	2.45122	0.213724	0.361217	length	N. Yukon	Rat River	Lower Cretaceous (Aptian)	EPMA
807	1148-07	2010LHA161A1	55	0.4899	0.352238	2.49	2.89709	0.137662	0.407086	length	N. Yukon	Rat River	Lower Cretaceous (Aptian)	EPMA
808	1148-07	2010LHA161A1	56	0.0512	0.0229812	2.44	1.82484	0.0282188	0.61516	length	N. Yukon	Rat River	Lower Cretaceous (Aptian)	EPMA
809	1148-07	2010LHA161A1	57	0.0269	-0.00891513	1.8	1.72097	0.0358151	0.0790327	length	N. Yukon	Rat River	Lower Cretaceous (Aptian)	EPMA
810	1148-07	2010LHA161A1	58	0.0829	0.0998876	2.82	2.07529	0.0169876	0.744709	length	N. Yukon	Rat River	Lower Cretaceous (Aptian)	EPMA
811	1148-07	2010LHA161A1	59	0.0044	-0.0593239	2.28	1.55681	0.0637239	0.723192	length	N. Yukon	Rat River	Lower Cretaceous (Aptian)	EPMA
812	1148-07	2010LHA161A1	60	0	-0.0315419	1.73	1.64728	0.0315419	0.0827185	length	N. Yukon	Rat River	Lower Cretaceous (Aptian)	EPMA
813	1148-07	2010LHA161A1	62	0.0225	-0.000514757	2.48	1.74832	0.0230148	0.731676	length	N. Yukon	Rat River	Lower Cretaceous (Aptian)	EPMA
814	1148-07	2010LHA161A1	63	0.0354	0.0319522	2.27	1.85405	0.00344779	0.415945	length	N. Yukon	Rat River	Lower Cretaceous (Aptian)	EPMA
815	1148-07	2010LHA161A1	64	0.0052	0.0103625	2.23	1.78375	0.00516247	0.446254	length	N. Yukon	Rat River	Lower Cretaceous (Aptian)	EPMA
816	1148-07	2010LHA161A1	65	0.0164	0.00598278	2.12	1.76948	0.0104172	0.350517	length	N. Yukon	Rat River	Lower Cretaceous (Aptian)	EPMA
817	1148-07	2010LHA161A1	66	0.0148	0.0413017	2.24	1.8845	0.0265017	0.355498	length	N. Yukon	Rat River	Lower Cretaceous (Aptian)	EPMA
818	1148-07	2010LHA161A1	67	0.0097	-0.0180836	1.9	1.69111	0.0277836	0.208891	length	N. Yukon	Rat River	Lower Cretaceous (Aptian)	EPMA
819	1148-07	2010LHA161A1	68	0.0185	0.0426612	2.02	1.88893	0.0241612	0.131071	length	N. Yukon	Rat River	Lower Cretaceous (Aptian)	EPMA
820	1148-07	2010LHA161A1	69	0.0034	-0.0309074	2.03	1.64935	0.0343074	0.380652	length	N. Yukon	Rat River	Lower Cretaceous (Aptian)	EPMA
821	1148-07	2010LHA161A1	70	0.0039	-0.0150077	2.07	1.70113	0.0189077	0.368874	length	N. Yukon	Rat River	Lower Cretaceous (Aptian)	EPMA
822	1148-07	2010LHA161A1	71	0.0479	0.0974747	2.46	2.06743	0.0495747	0.392567	length	N. Yukon	Rat River	Lower Cretaceous (Aptian)	EPMA
823	1148-07	2010LHA161A1	72	0.0405	-0.00439645	2.11	1.73568	0.0448964	0.374317	length	N. Yukon	Rat River	Lower Cretaceous (Aptian)	EPMA
824	1148-07	2010LHA161A1	73	0.0143	0.0407568	2.93	1.88273	0.0264568	1.04727	length	N. Yukon	Rat River	Lower Cretaceous (Aptian)	EPMA
825	1148-07	2010LHA161A1	74	0.0096	-0.0302738	1.97	1.65141	0.0398738	0.318589	length	N. Yukon	Rat River	Lower Cretaceous (Aptian)	EPMA
826	1148-07	2010LHA161A1	75	0.0586	0.0504706	2.16	1.91436	0.00812945	0.245639	length	N. Yukon	Rat River	Lower Cretaceous (Aptian)	EPMA
827	1148-07	2010LHA161A1	76	0.0058	0.0344451	2.12	1.86217	0.0286451	0.257827	length	N. Yukon	Rat River	Lower Cretaceous (Aptian)	EPMA
828	1148-07	2010LHA161A1	77	0.1184	0.085967	2.42	2.02996	0.032433	0.390042	length	N. Yukon	Rat River	Lower Cretaceous (Aptian)	EPMA
829	1148-07	2010LHA161A1	78	0.0858	0.0573644	2.3	1.93681	0.0284356	0.363189	length	N. Yukon	Rat River	Lower Cretaceous (Aptian)	EPMA
830	1148-07	2010LHA161A1	79	0.0392	0.111536	1.92	2.11323	0.0723365	0.193226	length	N. Yukon	Rat River	Lower Cretaceous (Aptian)	EPMA
831	1148-07	2010LHA161A1	80	0.1209	0.124737	2.71	2.15621	0.00383697	0.553785	length	N. Yukon	Rat River	Lower Cretaceous (Aptian)	EPMA
832	091-01	15FNA020A01	1	0.0285	0.0911433	1.84871	2.04681	0.0626433	0.198102	age	Northern Interior Plains, NWT	Martin House	Lower Cretaceous	EPMA
833	091-01	15FNA020A01	3	0.0581	0.0552539	1.9186	1.92994	0.00284612	0.0113381	age	Northern Interior Plains, NWT	Martin House	Lower Cretaceous	EPMA
834	091-01	15FNA020A01	4	0.0194	0.116675	1.86868	2.12996	0.097275	0.26128	age	Northern Interior Plains, NWT	Martin House	Lower Cretaceous	EPMA
835	091-01	15FNA020A01	5	0.059	0.0664893	1.96852	1.96653	0.00748929	0.00199306	age	Northern Interior Plains, NWT	Martin House	Lower Cretaceous	EPMA
836	091-01	15FNA020A01	6	0.0708	0.0872046	1.75886	2.03399	0.0164046	0.275132	age	Northern Interior Plains, NWT	Martin House	Lower Cretaceous	EPMA
837	091-01	15FNA020A01	8	0.0258	0.0581535	2.12826	1.93938	0.0323535	0.188883	age	Northern Interior Plains, NWT	Martin House	Lower Cretaceous	EPMA
838	091-01	15FNA020A01	12	0.0443	0.0485973	1.62906	1.90826	0.00429727	0.279196	age	Northern Interior Plains, NWT	Martin House	Lower Cretaceous	EPMA
839	091-01	15FNA020A01	17	0.0559	0.075442	1.73889	1.99568	0.019542	0.256794	age	Northern Interior Plains, NWT	Martin House	Lower Cretaceous	EPMA
840	091-01	15FNA020A01	21	0.0291	0.120608	1.99847	2.14277	0.0915079	0.144296	age	Northern Interior Plains, NWT	Martin House	Lower Cretaceous	EPMA
841	091-01	15FNA020A01	23	0.108	0.133113	2.08833	2.18349	0.0251133	0.0951646	age	Northern Interior Plains, NWT	Martin House	Lower Cretaceous	EPMA
842	091-01	15FNA020A01	25	0.0537	0.0756953	1.54919	1.99651	0.0219953	0.447315	age	Northern Interior Plains, NWT	Martin House	Lower Cretaceous	EPMA
843	091-01	15FNA020A01	26	0.0542	0.0864624	1.84871	2.03157	0.0322624	0.182859	age	Northern Interior Plains, NWT	Martin House	Lower Cretaceous	EPMA
844	091-01	15FNA020A01	27	0.0562	0.0646783	1.8587	1.96063	0.0084783	0.101933	age	Northern Interior Plains, NWT	Martin House	Lower Cretaceous	EPMA
845	091-01	15FNA020A01	28	0.049	0.101329	1.77882	2.07999	0.0523294	0.301162	age	Northern Interior Plains, NWT	Martin House	Lower Cretaceous	EPMA
846	091-01	15FNA020A01	29	0.0475	0.110596	1.75886	2.11016	0.0630962	0.351308	age	Northern Interior Plains, NWT	Martin House	Lower Cretaceous	EPMA
847	091-01	15FNA020A01	32	0.0036	0.041846	1.79879	1.88627	0.038246	0.0874823	age	Northern Interior Plains, NWT	Martin House	Lower Cretaceous	EPMA
848	091-01	15FNA020A01	33	0.045	0.102528	1.74887	2.08389	0.0575276	0.335016	age	Northern Interior Plains, NWT	Martin House	Lower Cretaceous	EPMA
849	091-01	15FNA020A01	35	0.0494	0.0904073	1.57914	2.04442	0.0410073	0.465273	age	Northern Interior Plains, NWT	Martin House	Lower Cretaceous	EPMA
850	091-01	15FNA020A01	36	0.1605	0.200177	1.98849	2.40189	0.0396767	0.413401	age	Northern Interior Plains, NWT	Martin House	Lower Cretaceous	EPMA
851	091-01	15FNA020A01	37	0.1132	0.12428	2.08833	2.15473	0.01108	0.0663982	age	Northern Interior Plains, NWT	Martin House	Lower Cretaceous	EPMA
852	091-01	15FNA020A01	39	0.0821	0.0996469	2.14823	2.07451	0.0175469	0.0737251	age	Northern Interior Plains, NWT	Martin House	Lower Cretaceous	EPMA
853	091-01	15FNA020A01	40	0.0312	0.0442875	2.24807	1.89423	0.0130875	0.353847	age	Northern Interior Plains, NWT	Martin House	Lower Cretaceous	EPMA
854	091-01	15FNA020A01	1	0.0264	0.116907	1.58913	2.13072	0.0905073	0.541589	length	Northern Interior Plains, NWT	Martin House	Lower Cretaceous	EPMA
855	091-01	15FNA020A01	2	0.0536	0.0605128	2.11828	1.94706	0.00691275	0.171216	length	Northern Interior Plains, NWT	Martin House	Lower Cretaceous	EPMA
856	091-01	15FNA020A01	3	0.0671	0.0901617	2.36788	2.04362	0.0230617	0.324262	length	Northern Interior Plains, NWT	Martin House	Lower Cretaceous	EPMA
857	091-01	15FNA020A01	6	0.0197	0.0690645	2.07834	1.97491	0.0493645	0.103431	length	Northern Interior Plains, NWT	Martin House	Lower Cretaceous	EPMA
858	091-01	15FNA020A01	7	0.0518	0.0623397	1.83873	1.95301	0.0105397	0.114285	length	Northern Interior Plains, NWT	Martin House	Lower Cretaceous	EPMA
859	091-01	15FNA020A01	16	0.0512	0.102288	1.95854	2.08311	0.0510883	0.124573	length	Northern Interior Plains, NWT	Martin House	Lower Cretaceous	EPMA
860	091-01	15FNA020A01	17	0.0488	0.074935	1.96852	1.99403	0.026135	0.0255108	length	Northern Interior Plains, NWT	Martin House	Lower Cretaceous	EPMA
861	091-01	15FNA020A01	18	0.0441	0.110361	2.21812	2.1094	0.0662608	0.108722	length	Northern Interior Plains, NWT	Martin House	Lower Cretaceous	EPMA
862	091-01	15FNA020A01	20	0.0544	0.112475	1.75886	2.11628	0.0580749	0.357426	length	Northern Interior Plains, NWT	Martin House	Lower Cretaceous	EPMA
863	091-01	15FNA020A01	21	0.007	0.0325073	1.77882	1.85586	0.0255073	0.0770383	length	Northern Interior Plains, NWT	Martin House	Lower Cretaceous	EPMA
864	091-01	15FNA020A01	26	0.1122	0.109654	1.98849	2.1071	0.00254596	0.118608	length	Northern Interior Plains, NWT	Martin House	Lower Cretaceous	EPMA
865	091-01	15FNA020A01	27	0.0237	0.0330618	1.81876	1.85767	0.00936176	0.0389079	length	Northern Interior Plains, NWT	Martin House	Lower Cretaceous	EPMA
866	091-02	15MWB024A01	1	0.0084	-0.0271181	1.49927	1.66169	0.0355181	0.162416	age	Northern Interior Plains, NWT	sub-Martin House	Lower Cretaceous	EPMA
867	091-02	15MWB024A01	8	0.0277	0.00627602	1.4793	1.77044	0.021424	0.291134	age	Northern Interior Plains, NWT	sub-Martin House	Lower Cretaceous	EPMA
868	091-02	15MWB024A01	9	0.0058	0.0456385	1.9785	1.89862	0.0398385	0.079879	age	Northern Interior Plains, NWT	sub-Martin House	Lower Cretaceous	EPMA
869	091-02	15MWB024A01	18	0.0144	0.0218478	1.52922	1.82115	0.00744781	0.291925	age	Northern Interior Plains, NWT	sub-Martin House	Lower Cretaceous	EPMA
870	091-02	15MWB024A01	21	0.0079	0.0272075	1.48929	1.8386	0.0193075	0.349315	age	Northern Interior Plains, NWT	sub-Martin House	Lower Cretaceous	EPMA
871	091-02	15MWB024A01	25	0.0476	0.0736649	2.04839	1.98989	0.0260649	0.0584971	age	Northern Interior Plains, NWT	sub-Martin House	Lower Cretaceous	EPMA
872	091-02	15MWB024A01	26	0.0474	0.0764545	1.63905	1.99898	0.0290545	0.359931	age	Northern Interior Plains, NWT	sub-Martin House	Lower Cretaceous	EPMA
873	091-02	15MWB024A01	27	0.0432	0.0547248	1.50926	1.92821	0.0115248	0.418959	age	Northern Interior Plains, NWT	sub-Martin House	Lower Cretaceous	EPMA
874	091-02	15MWB024A01	28	0.0416	0.067521	1.89863	1.96989	0.025921	0.0712549	age	Northern Interior Plains, NWT	sub-Martin House	Lower Cretaceous	EPMA
875	091-02	15MWB024A01	29	0.082	0.0854711	1.89863	2.02834	0.0034711	0.12971	age	Northern Interior Plains, NWT	sub-Martin House	Lower Cretaceous	EPMA
876	091-02	15MWB024A01	2	0.0051	-0.0709086	1.86868	1.51908	0.0760086	0.349599	length	Northern Interior Plains, NWT	sub-Martin House	Lower Cretaceous	EPMA
877	091-02	15MWB024A01	4	0.0379	0.0377486	1.56916	1.87293	0.000151393	0.303771	length	Northern Interior Plains, NWT	sub-Martin House	Lower Cretaceous	EPMA
878	091-02	15MWB024A01	8	0.0165	0.00832364	1.92858	1.77711	0.00817636	0.151477	length	Northern Interior Plains, NWT	sub-Martin House	Lower Cretaceous	EPMA
879	091-02	15MWB024A01	9	0.0279	0.0698343	1.8587	1.97742	0.0419343	0.118724	length	Northern Interior Plains, NWT	sub-Martin House	Lower Cretaceous	EPMA
880	091-02	15MWB024A01	11	0.0029	0.0147021	1.73889	1.79788	0.0118021	0.0589904	length	Northern Interior Plains, NWT	sub-Martin House	Lower Cretaceous	EPMA
881	091-02	15MWB024A01	12	0.0523	0.0809842	2.44775	2.01373	0.0286842	0.434021	length	Northern Interior Plains, NWT	sub-Martin House	Lower Cretaceous	EPMA
882	091-02	15MWB024A01	13	0.0481	0.089916	1.81876	2.04282	0.041816	0.224057	length	Northern Interior Plains, NWT	sub-Martin House	Lower Cretaceous	EPMA
883	091-02	15MWB024A01	14	0.0524	0.0620791	2.21812	1.95216	0.00967912	0.265955	length	Northern Interior Plains, NWT	sub-Martin House	Lower Cretaceous	EPMA
884	091-02	15MWB024A01	15	0.0505	0.0380229	2.13825	1.87382	0.0124771	0.264424	length	Northern Interior Plains, NWT	sub-Martin House	Lower Cretaceous	EPMA
885	091-02	15MWB024A01	16	0.0474	0.0764545	2.29799	1.99898	0.0290545	0.299013	length	Northern Interior Plains, NWT	sub-Martin House	Lower Cretaceous	EPMA
886	091-02	15MWB024A01	17	0.0222	0.0599895	1.80878	1.94536	0.0377895	0.136584	length	Northern Interior Plains, NWT	sub-Martin House	Lower Cretaceous	EPMA
887	091-03	15MWB027A02	1	0.0098	0.0115236	1.84871	1.78753	0.00172359	0.0611846	age	Northern Interior Plains, NWT	Martin House?	Lower Cretaceous	EPMA
888	091-03	15MWB027A02	2	0.0847	0.110361	1.9186	2.1094	0.0256608	0.190798	age	Northern Interior Plains, NWT	Martin House?	Lower Cretaceous	EPMA
889	091-03	15MWB027A02	3	0.0512	0.0829836	2.19815	2.02024	0.0317836	0.17791	age	Northern Interior Plains, NWT	Martin House?	Lower Cretaceous	EPMA
890	091-03	15MWB027A02	4	0.0433	0.212105	1.80878	2.44073	0.168805	0.631959	age	Northern Interior Plains, NWT	Martin House?	Lower Cretaceous	EPMA
891	091-03	15MWB027A02	1	0.0044	0.00304038	1.73889	1.7599	0.00135962	0.0210132	length	Northern Interior Plains, NWT	Martin House?	Lower Cretaceous	EPMA
892	091-03	15MWB027A02	2	0.0588	0.0756953	2.52762	1.99651	0.0168953	0.531117	length	Northern Interior Plains, NWT	Martin House?	Lower Cretaceous	EPMA
893	091-04	HRI-14-sst	3	0.1959	0.30655	1.79879	2.7483	0.11065	0.949509	age	Hume River, NWT	Imperial	Upper Devonian	EPMA
894	091-04	HRI-14-sst	4	0.1718	0.260645	1.99847	2.59881	0.0888448	0.600336	age	Hume River, NWT	Imperial	Upper Devonian	EPMA
895	091-04	HRI-14-sst	5	0	0.0565741	1.58913	1.93424	0.0565741	0.345109	age	Hume River, NWT	Imperial	Upper Devonian	EPMA
896	091-04	HRI-14-sst	6	0.0195	0.0998876	1.88865	2.07529	0.0803876	0.186643	age	Hume River, NWT	Imperial	Upper Devonian	EPMA
897	091-04	HRI-14-sst	7	0.0601	0.210964	1.77882	2.43702	0.150864	0.658194	age	Hume River, NWT	Imperial	Upper Devonian	EPMA
898	091-04	HRI-14-sst	8	0.004	0.0453686	1.64903	1.89775	0.0413686	0.248714	age	Hume River, NWT	Imperial	Upper Devonian	EPMA
899	091-04	HRI-14-sst	9	0.0457	0.0792278	1.84871	2.00801	0.0335278	0.159299	age	Hume River, NWT	Imperial	Upper Devonian	EPMA
900	091-04	HRI-14-sst	10	0	-0.00710249	1.69895	1.72687	0.00710249	0.0279183	age	Hume River, NWT	Imperial	Upper Devonian	EPMA
901	091-04	HRI-14-sst	11	0.091	0.191327	1.9186	2.37307	0.100327	0.45447	age	Hume River, NWT	Imperial	Upper Devonian	EPMA
902	091-04	HRI-14-sst	12	0.0373	0.117371	1.64903	2.13223	0.0800714	0.483196	age	Hume River, NWT	Imperial	Upper Devonian	EPMA
903	091-04	HRI-14-sst	13	0.0025	-0.0249216	1.84871	1.66884	0.0274216	0.179871	age	Hume River, NWT	Imperial	Upper Devonian	EPMA
904	091-04	HRI-14-sst	14	0.6903	0.685014	2.08833	3.9808	0.00528577	1.89247	age	Hume River, NWT	Imperial	Upper Devonian	EPMA
905	091-04	HRI-14-sst	15	0.0019	0.0620791	1.9186	1.95216	0.0601791	0.0335649	age	Hume River, NWT	Imperial	Upper Devonian	EPMA
906	091-04	HRI-14-sst	16	0.1116	0.184127	2.37786	2.34962	0.072527	0.0282417	age	Hume River, NWT	Imperial	Upper Devonian	EPMA
907	091-04	HRI-14-sst	17	0.0416	0.145516	1.65902	2.22388	0.103916	0.564868	age	Hume River, NWT	Imperial	Upper Devonian	EPMA
908	091-04	HRI-14-sst	18	0.0022	-0.0101274	1.74887	1.71702	0.0123274	0.0318526	age	Hume River, NWT	Imperial	Upper Devonian	EPMA
909	091-04	HRI-14-sst	19	0.0498	0.193703	1.98849	2.38081	0.143903	0.39232	age	Hume River, NWT	Imperial	Upper Devonian	EPMA
910	091-04	HRI-14-sst	20	0	0.0164269	1.55918	1.8035	0.0164269	0.244319	age	Hume River, NWT	Imperial	Upper Devonian	EPMA
911	091-04	HRI-14-sst	21	0.246	0.234555	1.95854	2.51384	0.011445	0.555309	age	Hume River, NWT	Imperial	Upper Devonian	EPMA
912	091-04	HRI-14-sst	22	0.0177	0.119685	1.74887	2.13976	0.101985	0.390892	age	Hume River, NWT	Imperial	Upper Devonian	EPMA
913	091-04	HRI-14-sst	23	0.0101	0.0688076	1.78881	1.97408	0.0587076	0.185269	age	Hume River, NWT	Imperial	Upper Devonian	EPMA
914	091-04	HRI-14-sst	24	0.0499	0.181297	1.73889	2.34041	0.131397	0.601519	age	Hume River, NWT	Imperial	Upper Devonian	EPMA
915	091-04	HRI-14-sst	25	0.003	0.0531339	1.94855	1.92303	0.0501339	0.0255178	age	Hume River, NWT	Imperial	Upper Devonian	EPMA
916	091-04	HRI-14-sst	27	0.1253	0.152892	1.9785	2.2479	0.0275915	0.269398	age	Hume River, NWT	Imperial	Upper Devonian	EPMA
917	091-04	HRI-14-sst	28	0.0124	0.0631205	1.67898	1.95556	0.0507205	0.276572	age	Hume River, NWT	Imperial	Upper Devonian	EPMA
918	091-04	HRI-14-sst	30	0.0418	0.139798	1.68897	2.20526	0.097998	0.516294	age	Hume River, NWT	Imperial	Upper Devonian	EPMA
919	091-04	HRI-14-sst	31	0.1244	0.378776	2.17818	2.98351	0.254376	0.805326	age	Hume River, NWT	Imperial	Upper Devonian	EPMA
920	091-04	HRI-14-sst	32	0.0037	0.0680361	1.87866	1.97156	0.0643361	0.0929002	age	Hume River, NWT	Imperial	Upper Devonian	EPMA
921	091-04	HRI-14-sst	33	0.0118	0.11458	1.68897	2.12314	0.10278	0.434168	age	Hume River, NWT	Imperial	Upper Devonian	EPMA
922	091-04	HRI-14-sst	34	0.045	0.043746	1.669	1.89246	0.00125396	0.223462	age	Hume River, NWT	Imperial	Upper Devonian	EPMA
923	091-04	HRI-14-sst	35	0.0085	0.0252399	1.9186	1.8322	0.0167399	0.0864045	age	Hume River, NWT	Imperial	Upper Devonian	EPMA
924	091-04	HRI-14-sst	36	0.0175	0.0531339	1.8587	1.92303	0.0356339	0.0643382	age	Hume River, NWT	Imperial	Upper Devonian	EPMA
925	091-04	HRI-14-sst	37	0.0369	0.126561	2.03841	2.16215	0.0896606	0.123745	age	Hume River, NWT	Imperial	Upper Devonian	EPMA
926	091-04	HRI-14-sst	38	0.0372	0.0792278	1.70894	2.00801	0.0420278	0.299075	age	Hume River, NWT	Imperial	Upper Devonian	EPMA
927	091-04	HRI-14-sst	39	0.2507	0.317935	2.09831	2.78538	0.0672349	0.687065	age	Hume River, NWT	Imperial	Upper Devonian	EPMA
928	091-04	HRI-14-sst	40	0.2448	0.276832	2.61748	2.65152	0.032032	0.0340423	age	Hume River, NWT	Imperial	Upper Devonian	EPMA
929	091-04	HRI-14-sst	2	0.0257	0.0952926	1.96852	2.06033	0.0695926	0.091807	length	Hume River, NWT	Imperial	Upper Devonian	EPMA
930	091-04	HRI-14-sst	3	0.194	0.292325	2.51764	2.70198	0.0983248	0.184336	length	Hume River, NWT	Imperial	Upper Devonian	EPMA
931	091-04	HRI-14-sst	4	0.0444	0.0512711	2.00846	1.91697	0.00687113	0.091488	length	Hume River, NWT	Imperial	Upper Devonian	EPMA
932	091-04	HRI-14-sst	5	0.1759	0.293767	2.26804	2.70667	0.117867	0.438631	length	Hume River, NWT	Imperial	Upper Devonian	EPMA
933	091-04	HRI-14-sst	6	0.1937	0.271665	2.53761	2.6347	0.077965	0.0970876	length	Hume River, NWT	Imperial	Upper Devonian	EPMA
934	091-04	HRI-14-sst	7	0.0183	0.0510044	1.7289	1.9161	0.0327044	0.187195	length	Hume River, NWT	Imperial	Upper Devonian	EPMA
935	091-04	HRI-14-sst	9	0.6028	0.544581	2.4178	3.52346	0.0582195	1.10566	length	Hume River, NWT	Imperial	Upper Devonian	EPMA
936	091-04	HRI-14-sst	10	0.0514	0.0680361	2.12826	1.97156	0.0166361	0.1567	length	Hume River, NWT	Imperial	Upper Devonian	EPMA
937	091-04	HRI-14-sst	11	0.0024	0.0407568	1.86868	1.88273	0.0383568	0.0140473	length	Hume River, NWT	Imperial	Upper Devonian	EPMA
938	091-04	HRI-14-sst	12	0.0174	0.0255215	2.24807	1.83311	0.00812148	0.41496	length	Hume River, NWT	Imperial	Upper Devonian	EPMA
939	091-04	HRI-14-sst	13	0.2131	0.303269	2.18817	2.73762	0.0901686	0.549447	length	Hume River, NWT	Imperial	Upper Devonian	EPMA
940	091-04	HRI-14-sst	14	0.0237	0.116907	2.19815	2.13072	0.0932073	0.0674355	length	Hume River, NWT	Imperial	Upper Devonian	EPMA
941	091-04	HRI-14-sst	15	0.0504	0.106342	2.17818	2.09631	0.0559417	0.0818749	length	Hume River, NWT	Imperial	Upper Devonian	EPMA
942	091-04	HRI-14-sst	16	0.0028	0.0283282	1.92858	1.84225	0.0255282	0.0863314	length	Hume River, NWT	Imperial	Upper Devonian	EPMA
943	091-04	HRI-14-sst	17	0.0745	0.132889	1.94855	2.18276	0.0583888	0.23421	length	Hume River, NWT	Imperial	Upper Devonian	EPMA
944	091-04	HRI-14-sst	18	0.2545	0.209055	2.38785	2.4308	0.0454447	0.0429551	length	Hume River, NWT	Imperial	Upper Devonian	EPMA
945	091-04	HRI-14-sst	19	0.0646	0.0477922	1.98849	1.90564	0.0168078	0.0828495	length	Hume River, NWT	Imperial	Upper Devonian	EPMA
946	091-04	HRI-14-sst	20	0.1125	0.179672	2.34791	2.33512	0.0671725	0.0127962	length	Hume River, NWT	Imperial	Upper Devonian	EPMA
947	091-04	HRI-14-sst	21	0.0075	0.0526024	1.67898	1.9213	0.0451024	0.242319	length	Hume River, NWT	Imperial	Upper Devonian	EPMA
948	091-04	HRI-14-sst	22	0.0208	0.0981999	2.02842	2.06979	0.0773999	0.0413707	length	Hume River, NWT	Imperial	Upper Devonian	EPMA
949	091-04	HRI-14-sst	23	0.2358	0.224112	2.43777	2.47983	0.0116884	0.0420668	length	Hume River, NWT	Imperial	Upper Devonian	EPMA
950	091-04	HRI-14-sst	24	0.0205	0.115279	2.44775	2.12541	0.0947791	0.322338	length	Hume River, NWT	Imperial	Upper Devonian	EPMA
951	091-04	HRI-14-sst	25	0.0396	0.0844777	1.86868	2.02511	0.0448777	0.156427	length	Hume River, NWT	Imperial	Upper Devonian	EPMA
952	091-04	HRI-14-sst	26	0.0959	0.269144	2.15822	2.62649	0.173244	0.468271	length	Hume River, NWT	Imperial	Upper Devonian	EPMA
953	091-04	HRI-14-sst	29	0.0322	0.107527	2.01844	2.10017	0.0753273	0.0817302	length	Hume River, NWT	Imperial	Upper Devonian	EPMA
954	091-04	HRI-14-sst	31	0.0697	0.391313	2.1083	3.02434	0.321613	0.916042	length	Hume River, NWT	Imperial	Upper Devonian	EPMA
955	091-04	HRI-14-sst	32	0	0.0552539	2.12826	1.92994	0.0552539	0.198326	length	Hume River, NWT	Imperial	Upper Devonian	EPMA
956	091-04	HRI-14-sst	33	0.0916	0.264914	2.44775	2.61271	0.173314	0.164958	length	Hume River, NWT	Imperial	Upper Devonian	EPMA
957	091-04	HRI-14-sst	34	0.3808	0.350254	2.2281	2.89062	0.0305464	0.662521	length	Hume River, NWT	Imperial	Upper Devonian	EPMA
958	091-04	HRI-14-sst	35	0.0394	0.166889	2.20814	2.29349	0.127489	0.0853496	length	Hume River, NWT	Imperial	Upper Devonian	EPMA
959	091-04	HRI-14-sst	36	0.0119	0.0526024	1.92858	1.9213	0.0407024	0.00728057	length	Hume River, NWT	Imperial	Upper Devonian	EPMA
960	091-04	HRI-14-sst	37	0.0073	0.0426612	1.86868	1.88893	0.0353612	0.0202492	length	Hume River, NWT	Imperial	Upper Devonian	EPMA
961	091-04	HRI-14-sst	38	0.037	0.211154	1.9186	2.43764	0.174154	0.519038	length	Hume River, NWT	Imperial	Upper Devonian	EPMA
962	091-04	HRI-14-sst	40	0.0524	0.0921229	1.62906	2.05	0.0397229	0.42094	length	Hume River, NWT	Imperial	Upper Devonian	EPMA
963	091-04	HRI-14-sst	41	0.2385	0.304834	1.9785	2.74271	0.0663339	0.764209	length	Hume River, NWT	Imperial	Upper Devonian	EPMA
964	091-04	HRI-14-sst	42	0.1453	0.192715	2.01844	2.37759	0.0474147	0.359149	length	Hume River, NWT	Imperial	Upper Devonian	EPMA
965	091-05	2008LHA2-4B	1	0	0.0499361	1.73889	1.91262	0.0499361	0.173732	age	Campbell Uplift, NWT	Horton River	Lower Cretaceous	EPMA
966	091-05	2008LHA2-4B	3	0.1019	0.320814	2.1083	2.79475	0.218914	0.686458	age	Campbell Uplift, NWT	Horton River	Lower Cretaceous	EPMA
967	091-05	2008LHA2-4B	4	0.0559	0.01326	1.46932	1.79318	0.04264	0.323862	age	Campbell Uplift, NWT	Horton River	Lower Cretaceous	EPMA
968	091-05	2008LHA2-4B	5	0.0744	0.213812	2.36788	2.44629	0.139412	0.0784132	age	Campbell Uplift, NWT	Horton River	Lower Cretaceous	EPMA
969	091-05	2008LHA2-4B	8	0.1784	0.249187	2.11828	2.56149	0.070787	0.443215	age	Campbell Uplift, NWT	Horton River	Lower Cretaceous	EPMA
970	091-05	2008LHA2-4B	9	0	0.0612966	1.87866	1.94962	0.0612966	0.0709525	age	Campbell Uplift, NWT	Horton River	Lower Cretaceous	EPMA
971	091-05	2008LHA2-4B	10	0.0221	0.0581535	1.67898	1.93938	0.0360535	0.260397	age	Campbell Uplift, NWT	Horton River	Lower Cretaceous	EPMA
972	091-05	2008LHA2-4B	12	0.256	0.285049	2.02842	2.67828	0.0290491	0.649858	age	Campbell Uplift, NWT	Horton River	Lower Cretaceous	EPMA
973	091-05	2008LHA2-4B	13	0.0935	0.0931004	1.95854	2.05319	0.000399567	0.094652	age	Campbell Uplift, NWT	Horton River	Lower Cretaceous	EPMA
974	091-05	2008LHA2-4B	14	0.0046	0.123135	1.6091	2.151	0.118535	0.541903	age	Campbell Uplift, NWT	Horton River	Lower Cretaceous	EPMA
975	091-05	2008LHA2-4B	15	0.023	0.0385709	1.92858	1.87561	0.0155709	0.0529752	age	Campbell Uplift, NWT	Horton River	Lower Cretaceous	EPMA
976	091-05	2008LHA2-4B	17	0.0392	0.12565	1.96852	2.15919	0.0864497	0.190667	age	Campbell Uplift, NWT	Horton River	Lower Cretaceous	EPMA
977	091-05	2008LHA2-4B	18	0.0485	0.14024	2.23809	2.2067	0.0917404	0.0313856	age	Campbell Uplift, NWT	Horton River	Lower Cretaceous	EPMA
978	091-05	2008LHA2-4B	19	0.142	0.182107	2.4178	2.34305	0.0401074	0.0747547	age	Campbell Uplift, NWT	Horton River	Lower Cretaceous	EPMA
979	091-05	2008LHA2-4B	20	0.0456	0.151814	1.90862	2.24439	0.106214	0.335777	age	Campbell Uplift, NWT	Horton River	Lower Cretaceous	EPMA
980	091-05	2008LHA2-4B	22	0.0491	0.0429327	1.669	1.88981	0.00616735	0.220813	age	Campbell Uplift, NWT	Horton River	Lower Cretaceous	EPMA
981	091-05	2008LHA2-4B	23	0.0205	0.0448284	2.17818	1.89599	0.0243284	0.282197	age	Campbell Uplift, NWT	Horton River	Lower Cretaceous	EPMA
982	091-05	2008LHA2-4B	24	0.0041	-0.0153144	1.98849	1.70013	0.0194144	0.288361	age	Campbell Uplift, NWT	Horton River	Lower Cretaceous	EPMA
983	091-05	2008LHA2-4B	27	0.1534	0.263552	1.92858	2.60827	0.110152	0.679691	age	Campbell Uplift, NWT	Horton River	Lower Cretaceous	EPMA
984	091-05	2008LHA2-4B	30	0.003	0.0423896	1.8587	1.88804	0.0393896	0.0293487	age	Campbell Uplift, NWT	Horton River	Lower Cretaceous	EPMA
985	091-05	2008LHA2-4B	31	0.1586	0.211535	1.81876	2.43888	0.0529347	0.620117	age	Campbell Uplift, NWT	Horton River	Lower Cretaceous	EPMA
986	091-05	2008LHA2-4B	32	0.0145	-0.00110988	1.71892	1.74639	0.0156099	0.0274656	age	Campbell Uplift, NWT	Horton River	Lower Cretaceous	EPMA
987	091-05	2008LHA2-4B	33	0.0126	0.065714	1.90862	1.964	0.053114	0.0553861	age	Campbell Uplift, NWT	Horton River	Lower Cretaceous	EPMA
988	091-05	2008LHA2-4B	35	0.2099	0.169182	2.04839	2.30095	0.0407177	0.252562	age	Campbell Uplift, NWT	Horton River	Lower Cretaceous	EPMA
989	091-05	2008LHA2-4B	39	0.1412	0.193308	1.73889	2.37952	0.0521081	0.640633	age	Campbell Uplift, NWT	Horton River	Lower Cretaceous	EPMA
990	091-05	2008LHA2-4B	40	0.1139	0.252514	2.11828	2.57233	0.138614	0.454049	age	Campbell Uplift, NWT	Horton River	Lower Cretaceous	EPMA
991	091-05	2008LHA2-4B	1	0.0733	0.208673	2.17818	2.42956	0.135373	0.251373	length	Campbell Uplift, NWT	Horton River	Lower Cretaceous	EPMA
992	091-05	2008LHA2-4B	2	0.0129	-0.00800794	2.05838	1.72392	0.0209079	0.334454	length	Campbell Uplift, NWT	Horton River	Lower Cretaceous	EPMA
993	091-05	2008LHA2-4B	3	0.0399	0.0767073	1.94855	1.9998	0.0368073	0.0512506	length	Campbell Uplift, NWT	Horton River	Lower Cretaceous	EPMA
994	091-05	2008LHA2-4B	5	0.073	0.205023	2.19815	2.41767	0.132023	0.219518	length	Campbell Uplift, NWT	Horton River	Lower Cretaceous	EPMA
995	091-05	2008LHA2-4B	7	0.0224	0.0158527	1.79879	1.80163	0.00654733	0.00283332	length	Campbell Uplift, NWT	Horton River	Lower Cretaceous	EPMA
996	091-05	2008LHA2-4B	8	0.2056	0.185937	2.26804	2.35552	0.0196626	0.0874778	length	Campbell Uplift, NWT	Horton River	Lower Cretaceous	EPMA
997	091-05	2008LHA2-4B	9	0.254	0.291522	2.3579	2.69936	0.0375218	0.341465	length	Campbell Uplift, NWT	Horton River	Lower Cretaceous	EPMA
998	091-05	2008LHA2-4B	10	0.0044	0.105629	1.89863	2.09399	0.101229	0.195356	length	Campbell Uplift, NWT	Horton River	Lower Cretaceous	EPMA
999	091-05	2008LHA2-4B	11	0.0918	0.0926119	1.95854	2.0516	0.000811902	0.093061	length	Campbell Uplift, NWT	Horton River	Lower Cretaceous	EPMA
1000	091-05	2008LHA2-4B	12	0.0229	0.0258029	1.90862	1.83403	0.0029029	0.0745871	length	Campbell Uplift, NWT	Horton River	Lower Cretaceous	EPMA
1001	091-05	2008LHA2-4B	13	0.0723	0.0837312	2.06836	2.02268	0.0114312	0.0456835	length	Campbell Uplift, NWT	Horton River	Lower Cretaceous	EPMA
1002	091-05	2008LHA2-4B	16	0.1464	0.164164	2.36788	2.28461	0.0177644	0.0832674	length	Campbell Uplift, NWT	Horton River	Lower Cretaceous	EPMA
1003	091-05	2008LHA2-4B	20	0.1605	0.253386	2.29799	2.57517	0.0928855	0.277175	length	Campbell Uplift, NWT	Horton River	Lower Cretaceous	EPMA
1004	091-05	2008LHA2-4B	22	0.0094	-0.00680105	2.01844	1.72785	0.0162011	0.290588	length	Campbell Uplift, NWT	Horton River	Lower Cretaceous	EPMA
1005	091-05	2008LHA2-4B	24	0.0261	0.0226981	2.04839	1.82392	0.00340189	0.224474	length	Campbell Uplift, NWT	Horton River	Lower Cretaceous	EPMA
1006	091-05	2008LHA2-4B	26	0.0735	0.126105	2.36788	2.16067	0.0526054	0.207209	length	Campbell Uplift, NWT	Horton River	Lower Cretaceous	EPMA
1007	091-05	2008LHA2-4B	28	0.0043	0.05446	1.75886	1.92735	0.05016	0.168497	length	Campbell Uplift, NWT	Horton River	Lower Cretaceous	EPMA
1008	091-05	2008LHA2-4B	29	0.0063	0.0413017	1.61908	1.8845	0.0350017	0.265422	length	Campbell Uplift, NWT	Horton River	Lower Cretaceous	EPMA
1009	091-05	2008LHA2-4B	30	0.0264	0.00715466	1.71892	1.7733	0.0192453	0.0543796	length	Campbell Uplift, NWT	Horton River	Lower Cretaceous	EPMA
1010	091-05	2008LHA2-4B	31	0.0471	0.179672	2.15822	2.33512	0.132572	0.1769	length	Campbell Uplift, NWT	Horton River	Lower Cretaceous	EPMA
1011	091-05	2008LHA2-4B	33	0.0255	0.0847262	2.15822	2.02592	0.0592262	0.132299	length	Campbell Uplift, NWT	Horton River	Lower Cretaceous	EPMA
1012	091-05	2008LHA2-4B	35	0.0494	0.129509	2.04839	2.17176	0.0801092	0.123364	length	Campbell Uplift, NWT	Horton River	Lower Cretaceous	EPMA
1013	091-05	2008LHA2-4B	36	0.0085	0.0879456	1.73889	2.0364	0.0794456	0.297513	length	Campbell Uplift, NWT	Horton River	Lower Cretaceous	EPMA
1014	091-05	2008LHA2-4B	37	0.002	0.123594	2.01844	2.15249	0.121594	0.134051	length	Campbell Uplift, NWT	Horton River	Lower Cretaceous	EPMA
1015	091-06	2012-KMB03-01	1	0.053	0.159942	2.11828	2.27086	0.106942	0.152582	age	Bell Basin, Yukon	Cody Creek	Upper Cretaceous	EPMA
1016	091-06	2012-KMB03-01	2	0.0465	0.169182	1.69895	2.30095	0.122682	0.602002	age	Bell Basin, Yukon	Cody Creek	Upper Cretaceous	EPMA
1017	091-06	2012-KMB03-01	3	0.0971	0.0981999	2.06836	2.06979	0.00109988	0.00143467	age	Bell Basin, Yukon	Cody Creek	Upper Cretaceous	EPMA
1018	091-06	2012-KMB03-01	4	0.0638	0.187541	1.88865	2.36074	0.123741	0.472091	age	Bell Basin, Yukon	Cody Creek	Upper Cretaceous	EPMA
1019	091-06	2012-KMB03-01	5	0.0704	0.224482	2.21812	2.48104	0.154082	0.262921	age	Bell Basin, Yukon	Cody Creek	Upper Cretaceous	EPMA
1020	091-06	2012-KMB03-01	6	0.1292	0.207715	1.83873	2.42644	0.0785149	0.58771	age	Bell Basin, Yukon	Cody Creek	Upper Cretaceous	EPMA
1021	091-06	2012-KMB03-01	7	0.0596	0.124737	1.7289	2.15621	0.065137	0.427311	age	Bell Basin, Yukon	Cody Creek	Upper Cretaceous	EPMA
1022	091-06	2012-KMB03-01	8	0.0827	0.199397	2.14823	2.39935	0.116697	0.251117	age	Bell Basin, Yukon	Cody Creek	Upper Cretaceous	EPMA
1023	091-06	2012-KMB03-01	9	0.0523	0.149001	2.08833	2.23523	0.0967013	0.146905	age	Bell Basin, Yukon	Cody Creek	Upper Cretaceous	EPMA
1024	091-06	2012-KMB03-01	10	0.0747	0.190533	1.99847	2.37048	0.115833	0.372011	age	Bell Basin, Yukon	Cody Creek	Upper Cretaceous	EPMA
1025	091-06	2012-KMB03-01	11	0.0112	0.215701	1.83873	2.45245	0.204501	0.613718	age	Bell Basin, Yukon	Cody Creek	Upper Cretaceous	EPMA
1026	091-06	2012-KMB03-01	12	0.1183	0.201539	2.08833	2.40632	0.0832385	0.317996	age	Bell Basin, Yukon	Cody Creek	Upper Cretaceous	EPMA
1027	091-06	2012-KMB03-01	13	0.0833	0.197833	2.37786	2.39426	0.114533	0.0163925	age	Bell Basin, Yukon	Cody Creek	Upper Cretaceous	EPMA
1028	091-06	2012-KMB03-01	15	0.0522	0.258065	2.88705	2.59041	0.205865	0.296642	age	Bell Basin, Yukon	Cody Creek	Upper Cretaceous	EPMA
1029	091-06	2012-KMB03-01	16	0.1286	0.255818	2.27802	2.58309	0.127218	0.305064	age	Bell Basin, Yukon	Cody Creek	Upper Cretaceous	EPMA
1030	091-06	2012-KMB03-01	17	0.1034	0.231829	2.09831	2.50497	0.128429	0.406655	age	Bell Basin, Yukon	Cody Creek	Upper Cretaceous	EPMA
1031	091-06	2012-KMB03-01	18	0.0529	0.203671	2.1083	2.41327	0.150771	0.304972	age	Bell Basin, Yukon	Cody Creek	Upper Cretaceous	EPMA
1032	091-06	2012-KMB03-01	19	0.0032	-0.0168509	1.92858	1.69512	0.0200509	0.23346	age	Bell Basin, Yukon	Cody Creek	Upper Cretaceous	EPMA
1033	091-06	2012-KMB03-01	21	0.059	0.13758	2.00846	2.19804	0.0785802	0.189583	age	Bell Basin, Yukon	Cody Creek	Upper Cretaceous	EPMA
1034	091-06	2012-KMB03-01	22	0.1283	0.187541	1.95854	2.36074	0.0592408	0.402203	age	Bell Basin, Yukon	Cody Creek	Upper Cretaceous	EPMA
1035	091-06	2012-KMB03-01	24	0.0139	0.15973	2.03841	2.27017	0.14583	0.231763	age	Bell Basin, Yukon	Cody Creek	Upper Cretaceous	EPMA
1036	091-06	2012-KMB03-01	25	0.0456	0.210964	1.88865	2.43702	0.165364	0.54837	age	Bell Basin, Yukon	Cody Creek	Upper Cretaceous	EPMA
1037	091-06	2012-KMB03-01	26	0.0429	0.139355	1.71892	2.20382	0.0964553	0.4849	age	Bell Basin, Yukon	Cody Creek	Upper Cretaceous	EPMA
1038	091-06	2012-KMB03-01	27	0.1216	0.144422	2.00846	2.22032	0.022822	0.211864	age	Bell Basin, Yukon	Cody Creek	Upper Cretaceous	EPMA
1039	091-06	2012-KMB03-01	29	0.0524	0.132215	1.82874	2.18057	0.0798148	0.351823	age	Bell Basin, Yukon	Cody Creek	Upper Cretaceous	EPMA
1040	091-06	2012-KMB03-01	31	0.0397	0.113645	1.64903	2.12009	0.0739453	0.471062	age	Bell Basin, Yukon	Cody Creek	Upper Cretaceous	EPMA
1041	091-06	2012-KMB03-01	33	0.1016	0.240498	2.00846	2.5332	0.138898	0.524742	age	Bell Basin, Yukon	Cody Creek	Upper Cretaceous	EPMA
1042	091-06	2012-KMB03-01	34	0.089	0.191922	1.95854	2.37501	0.102922	0.416473	age	Bell Basin, Yukon	Cody Creek	Upper Cretaceous	EPMA
1043	091-06	2012-KMB03-01	35	0.0762	0.220392	2.29799	2.46772	0.144192	0.16973	age	Bell Basin, Yukon	Cody Creek	Upper Cretaceous	EPMA
1044	091-06	2012-KMB03-01	36	0.0204	0.117139	2.00846	2.13147	0.0967394	0.123016	age	Bell Basin, Yukon	Cody Creek	Upper Cretaceous	EPMA
1045	091-06	2012-KMB03-01	37	0.128	0.163744	1.90862	2.28324	0.0357438	0.374627	age	Bell Basin, Yukon	Cody Creek	Upper Cretaceous	EPMA
1046	091-06	2012-KMB03-01	38	0.0921	0.18674	2.29799	2.35813	0.0946397	0.0601388	age	Bell Basin, Yukon	Cody Creek	Upper Cretaceous	EPMA
1047	091-06	2012-KMB03-01	39	0.0604	0.162691	1.75886	2.27981	0.102291	0.520958	age	Bell Basin, Yukon	Cody Creek	Upper Cretaceous	EPMA
1048	091-06	2012-KMB03-01	1	0.0511	0.188939	1.68897	2.36529	0.137839	0.676326	length	Bell Basin, Yukon	Cody Creek	Upper Cretaceous	EPMA
1049	091-06	2012-KMB03-01	2	0.0828	0.0762016	1.87866	1.99816	0.00659841	0.119492	length	Bell Basin, Yukon	Cody Creek	Upper Cretaceous	EPMA
1050	091-06	2012-KMB03-01	3	0.0659	0.176611	2.05838	2.32515	0.110711	0.26677	length	Bell Basin, Yukon	Cody Creek	Upper Cretaceous	EPMA
1051	091-06	2012-KMB03-01	4	0.0519	0.0918782	1.89863	2.04921	0.0399782	0.150576	length	Bell Basin, Yukon	Cody Creek	Upper Cretaceous	EPMA
1052	091-06	2012-KMB03-01	5	0.0315	0.114813	1.9186	2.1239	0.0833129	0.205296	length	Bell Basin, Yukon	Cody Creek	Upper Cretaceous	EPMA
1053	091-06	2012-KMB03-01	7	0.0659	0.185536	2.29799	2.35421	0.119636	0.0562176	length	Bell Basin, Yukon	Cody Creek	Upper Cretaceous	EPMA
1054	091-06	2012-KMB03-01	8	0.0736	0.22927	2.12826	2.49663	0.15567	0.368371	length	Bell Basin, Yukon	Cody Creek	Upper Cretaceous	EPMA
1055	091-06	2012-KMB03-01	9	0.0789	0.183925	2.33793	2.34897	0.105025	0.0110379	length	Bell Basin, Yukon	Cody Creek	Upper Cretaceous	EPMA
1056	091-06	2012-KMB03-01	11	0.1448	0.200955	2.00846	2.40442	0.0561554	0.395969	length	Bell Basin, Yukon	Cody Creek	Upper Cretaceous	EPMA
1057	091-06	2012-KMB03-01	12	0.1494	0.171878	1.96852	2.30973	0.0224784	0.341214	length	Bell Basin, Yukon	Cody Creek	Upper Cretaceous	EPMA
1058	091-06	2012-KMB03-01	14	0.0462	0.119455	1.86868	2.13901	0.0732546	0.270332	length	Bell Basin, Yukon	Cody Creek	Upper Cretaceous	EPMA
1059	091-06	2012-KMB03-01	15	0.1706	0.287649	2.13825	2.68675	0.117049	0.5485	length	Bell Basin, Yukon	Cody Creek	Upper Cretaceous	EPMA
1060	091-07	KWJ10-02	1	0.0179	0.0908981	1.93857	2.04602	0.0729981	0.107448	age	Dave Lord Range, NW Yukon	Sharp Mountain	Lower Cretaceous	EPMA
1061	091-07	KWJ10-02	2	0.4683	0.349543	1.82874	2.88831	0.118757	1.05957	age	Dave Lord Range, NW Yukon	Sharp Mountain	Lower Cretaceous	EPMA
1062	091-07	KWJ10-02	6	0.0711	0.11853	2.51764	2.136	0.0474298	0.381639	age	Dave Lord Range, NW Yukon	Sharp Mountain	Lower Cretaceous	EPMA
1063	091-07	KWJ10-02	9	0.0027	-0.0233588	2.20814	1.67393	0.0260588	0.534206	age	Dave Lord Range, NW Yukon	Sharp Mountain	Lower Cretaceous	EPMA
1064	091-07	KWJ10-02	10	0.0859	0.158242	1.89863	2.26533	0.0723423	0.366695	age	Dave Lord Range, NW Yukon	Sharp Mountain	Lower Cretaceous	EPMA
1065	091-07	KWJ10-02	14	0.0762	0.085967	1.76884	2.02996	0.00976703	0.261118	age	Dave Lord Range, NW Yukon	Sharp Mountain	Lower Cretaceous	EPMA
1066	091-07	KWJ10-02	15	0.1111	0.112475	2.02842	2.11628	0.0013749	0.0878582	age	Dave Lord Range, NW Yukon	Sharp Mountain	Lower Cretaceous	EPMA
1067	091-07	KWJ10-02	16	0.1603	0.220765	2.24807	2.46894	0.0604653	0.220865	age	Dave Lord Range, NW Yukon	Sharp Mountain	Lower Cretaceous	EPMA
1068	091-07	KWJ10-02	17	0.121	0.3389	2.13825	2.85365	0.2179	0.715403	age	Dave Lord Range, NW Yukon	Sharp Mountain	Lower Cretaceous	EPMA
1069	091-07	KWJ10-02	18	0.1278	0.22927	1.82874	2.49663	0.10147	0.667891	age	Dave Lord Range, NW Yukon	Sharp Mountain	Lower Cretaceous	EPMA
1070	091-07	KWJ10-02	19	0.0757	0.179469	1.80878	2.33445	0.103769	0.525677	age	Dave Lord Range, NW Yukon	Sharp Mountain	Lower Cretaceous	EPMA
1071	091-07	KWJ10-02	21	0.2282	0.251116	2.19815	2.56778	0.0229159	0.369624	age	Dave Lord Range, NW Yukon	Sharp Mountain	Lower Cretaceous	EPMA
1072	091-07	KWJ10-02	28	0.0039	-0.0205588	1.64903	1.68305	0.0244588	0.0340169	age	Dave Lord Range, NW Yukon	Sharp Mountain	Lower Cretaceous	EPMA
1073	091-07	KWJ10-02	1	0.0884	0.15203	1.67898	2.2451	0.0636298	0.566111	length	Dave Lord Range, NW Yukon	Sharp Mountain	Lower Cretaceous	EPMA
1074	091-07	KWJ10-02	2	0.0671	0.169806	2.21812	2.30298	0.102706	0.0848644	length	Dave Lord Range, NW Yukon	Sharp Mountain	Lower Cretaceous	EPMA
1075	091-07	KWJ10-02	6	0.1147	0.129057	2.09831	2.17028	0.0143568	0.0719703	length	Dave Lord Range, NW Yukon	Sharp Mountain	Lower Cretaceous	EPMA
1076	091-07	KWJ10-02	8	0.1109	0.114813	2.12826	2.1239	0.00391287	0.00436798	length	Dave Lord Range, NW Yukon	Sharp Mountain	Lower Cretaceous	EPMA
1077	091-07	KWJ10-02	9	0.1528	0.218146	2.08833	2.46041	0.0653463	0.37208	length	Dave Lord Range, NW Yukon	Sharp Mountain	Lower Cretaceous	EPMA
1078	091-07	KWJ10-02	10	0.1332	0.212675	2.20814	2.44259	0.0794747	0.234454	length	Dave Lord Range, NW Yukon	Sharp Mountain	Lower Cretaceous	EPMA
1079	091-07	KWJ10-02	11	0.1941	0.22817	1.84871	2.49305	0.0340697	0.644338	length	Dave Lord Range, NW Yukon	Sharp Mountain	Lower Cretaceous	EPMA
1080	091-07	KWJ10-02	15	0.1131	0.173324	1.67898	2.31444	0.0602238	0.635457	length	Dave Lord Range, NW Yukon	Sharp Mountain	Lower Cretaceous	EPMA
1081	091-08	697NC-3	1	0.3763	0.333046	1.81876	2.83459	0.0432542	1.01583	age	Kandik Basin, NW Yukon	Kamik	Lower Cretaceous	EPMA
1082	091-08	697NC-3	2	0.0699	0.0576276	1.65902	1.93767	0.0122724	0.278652	age	Kandik Basin, NW Yukon	Kamik	Lower Cretaceous	EPMA
1083	091-08	697NC-3	3	0.0053	-0.0058979	1.78881	1.73079	0.0111979	0.0580149	age	Kandik Basin, NW Yukon	Kamik	Lower Cretaceous	EPMA
1084	091-08	697NC-3	4	0.0197	0.0226981	2.01844	1.82392	0.00299811	0.194522	age	Kandik Basin, NW Yukon	Kamik	Lower Cretaceous	EPMA
1085	091-08	697NC-3	5	0.0891	0.422928	1.76884	3.12729	0.333828	1.35845	age	Kandik Basin, NW Yukon	Kamik	Lower Cretaceous	EPMA
1086	091-08	697NC-3	7	0.034	0.0229812	1.7289	1.82484	0.0110188	0.0959359	age	Kandik Basin, NW Yukon	Kamik	Lower Cretaceous	EPMA
1087	091-08	697NC-3	8	0.0572	0.0688076	1.95854	1.97408	0.0116076	0.0155407	age	Kandik Basin, NW Yukon	Kamik	Lower Cretaceous	EPMA
1088	091-08	697NC-3	10	0.0258	0.0269269	1.65902	1.83769	0.0011269	0.178673	age	Kandik Basin, NW Yukon	Kamik	Lower Cretaceous	EPMA
1089	091-08	697NC-3	11	0.1245	0.165843	2.06836	2.29008	0.0413429	0.221719	age	Kandik Basin, NW Yukon	Kamik	Lower Cretaceous	EPMA
1090	091-08	697NC-3	1	0.0661	0.0560464	2.07834	1.93252	0.0100536	0.145825	length	Kandik Basin, NW Yukon	Kamik	Lower Cretaceous	EPMA
1091	091-08	697NC-3	2	0.3805	0.333193	2.12826	2.83507	0.047307	0.706802	length	Kandik Basin, NW Yukon	Kamik	Lower Cretaceous	EPMA
1092	091-08	697NC-3	3	0.043	0.0456385	2.30798	1.89862	0.00263853	0.409351	length	Kandik Basin, NW Yukon	Kamik	Lower Cretaceous	EPMA
1093	091-08	697NC-3	4	0.0043	0.00568936	1.73889	1.76853	0.00138936	0.0296398	length	Kandik Basin, NW Yukon	Kamik	Lower Cretaceous	EPMA
1094	091-08	697NC-3	5	0.0152	-0.00110988	2.08833	1.74639	0.0163099	0.341942	length	Kandik Basin, NW Yukon	Kamik	Lower Cretaceous	EPMA
1095	091-08	697NC-3	6	0.0951	0.440275	2.18817	3.18379	0.345175	0.995618	length	Kandik Basin, NW Yukon	Kamik	Lower Cretaceous	EPMA
1096	091-08	697NC-3	8	0.0386	0.0461779	1.81876	1.90038	0.00757785	0.0816214	length	Kandik Basin, NW Yukon	Kamik	Lower Cretaceous	EPMA
1097	091-08	697NC-3	9	0.0091	0.00715466	1.8587	1.7733	0.00194534	0.0853964	length	Kandik Basin, NW Yukon	Kamik	Lower Cretaceous	EPMA
1098	091-08	697NC-3	10	0.0653	0.0602512	1.81876	1.94621	0.00504881	0.127452	length	Kandik Basin, NW Yukon	Kamik	Lower Cretaceous	EPMA
1099	091-08	697NC-3	11	0.113	0.13154	1.93857	2.17837	0.0185399	0.239801	length	Kandik Basin, NW Yukon	Kamik	Lower Cretaceous	EPMA
1100	091-09	2012HRB009	1	0.1391	0.168974	1.9785	2.30028	0.0298743	0.321772	age	Nahoni Range, N. Yukon	Hart River	Carboniferous	EPMA
1101	091-09	2012HRB009	2	0.0709	0.112475	1.95854	2.11628	0.0415749	0.157746	age	Nahoni Range, N. Yukon	Hart River	Carboniferous	EPMA
1102	091-09	2012HRB009	4	0.0732	0.100369	1.62906	2.07686	0.0271687	0.447794	age	Nahoni Range, N. Yukon	Hart River	Carboniferous	EPMA
1103	091-09	2012HRB009	5	0.0042	0.0480607	1.50926	1.90651	0.0438607	0.397257	age	Nahoni Range, N. Yukon	Hart River	Carboniferous	EPMA
1104	091-09	2012HRB009	7	0.1298	0.129735	1.92858	2.17249	6.4712e-05	0.243908	age	Nahoni Range, N. Yukon	Hart River	Carboniferous	EPMA
1105	091-09	2012HRB009	1	0.1432	0.151814	1.82874	2.24439	0.00861408	0.415649	length	Nahoni Range, N. Yukon	Hart River	Carboniferous	EPMA
1106	091-09	2012HRB009	2	0.0608	0.0913884	2.12826	2.04761	0.0305884	0.0806515	length	Nahoni Range, N. Yukon	Hart River	Carboniferous	EPMA
1107	091-09	2012HRB009	3	0.0638	0.065714	2.05838	1.964	0.001914	0.0943739	length	Nahoni Range, N. Yukon	Hart River	Carboniferous	EPMA
1108	091-09	2012HRB009	4	0.0037	0.0330618	2.07834	1.85767	0.0293618	0.220676	length	Nahoni Range, N. Yukon	Hart River	Carboniferous	EPMA
1109	091-09	2012HRB009	6	0.1311	0.129509	1.80878	2.17176	0.00159077	0.36298	length	Nahoni Range, N. Yukon	Hart River	Carboniferous	EPMA
1110	091-10	636NC-5	1	0.0054	-0.0792597	1.54919	1.49189	0.0846597	0.0573066	age	Kandik Basin, NW Yukon	Monster	Upper Cretaceous	EPMA
1111	091-10	636NC-5	2	0.0739	0.0827342	1.90862	2.01943	0.00883416	0.110813	age	Kandik Basin, NW Yukon	Monster	Upper Cretaceous	EPMA
1112	091-10	636NC-5	3	0.2155	0.180689	1.98849	2.33842	0.0348115	0.349937	age	Kandik Basin, NW Yukon	Monster	Upper Cretaceous	EPMA
1113	091-10	636NC-5	4	0	-0.0813706	1.74887	1.48501	0.0813706	0.263861	age	Kandik Basin, NW Yukon	Monster	Upper Cretaceous	EPMA
1114	091-10	636NC-5	5	0	-0.083491	1.57914	1.47811	0.083491	0.101038	age	Kandik Basin, NW Yukon	Monster	Upper Cretaceous	EPMA
1115	091-10	636NC-5	6	0.0026	-0.0695309	1.67898	1.52357	0.0721309	0.155416	age	Kandik Basin, NW Yukon	Monster	Upper Cretaceous	EPMA
1116	091-10	636NC-5	7	0.0364	0.0415739	1.59911	1.88539	0.00517391	0.286276	age	Kandik Basin, NW Yukon	Monster	Upper Cretaceous	EPMA
1117	091-10	636NC-5	9	0.0255	-0.0277476	1.93857	1.65964	0.0532476	0.27893	age	Kandik Basin, NW Yukon	Monster	Upper Cretaceous	EPMA
1118	091-10	636NC-5	10	0.0027	-0.0824296	1.63905	1.48156	0.0851296	0.157486	age	Kandik Basin, NW Yukon	Monster	Upper Cretaceous	EPMA
1119	091-10	636NC-5	1	0	-0.0729826	1.70894	1.51233	0.0729826	0.196609	length	Kandik Basin, NW Yukon	Monster	Upper Cretaceous	EPMA
1120	091-10	636NC-5	2	0.0788	0.175381	1.669	2.32114	0.096581	0.65214	length	Kandik Basin, NW Yukon	Monster	Upper Cretaceous	EPMA
1121	091-10	636NC-5	3	0.201	0.174148	2.13825	2.31712	0.0268522	0.178876	length	Kandik Basin, NW Yukon	Monster	Upper Cretaceous	EPMA
1122	091-10	636NC-5	4	0.0037	-0.0789088	1.65902	1.49303	0.0826088	0.165988	length	Kandik Basin, NW Yukon	Monster	Upper Cretaceous	EPMA
1123	091-10	636NC-5	5	0.0021	-0.0782077	1.53921	1.49531	0.0803077	0.0438968	length	Kandik Basin, NW Yukon	Monster	Upper Cretaceous	EPMA
1124	091-10	636NC-5	6	0	-0.0806659	1.50926	1.48731	0.0806659	0.0219501	length	Kandik Basin, NW Yukon	Monster	Upper Cretaceous	EPMA
1125	091-10	636NC-5	7	0.0255	0.0459083	2.05838	1.8995	0.0204083	0.158873	length	Kandik Basin, NW Yukon	Monster	Upper Cretaceous	EPMA
1126	091-11	698NC	1	0.1596	0.211915	1.45934	2.44012	0.052315	0.98078	age	Kandik Basin, NW Yukon	Kathul Greywacke	mid Cretaceous	EPMA
1127	091-11	698NC	2	0.0715	0.21438	1.75886	2.44814	0.14288	0.689286	age	Kandik Basin, NW Yukon	Kathul Greywacke	mid Cretaceous	EPMA
1128	091-11	698NC	3	0.0729	0.133338	1.70894	2.18422	0.0604376	0.475287	age	Kandik Basin, NW Yukon	Kathul Greywacke	mid Cretaceous	EPMA
1129	091-11	698NC	4	0.1605	0.217395	1.73889	2.45796	0.0568953	0.719075	age	Kandik Basin, NW Yukon	Kathul Greywacke	mid Cretaceous	EPMA
1130	091-11	698NC	5	0.1053	0.160578	1.87866	2.27293	0.0552776	0.394268	age	Kandik Basin, NW Yukon	Kathul Greywacke	mid Cretaceous	EPMA
1131	091-11	698NC	6	0.1378	0.0998876	1.82874	2.07529	0.0379124	0.246547	age	Kandik Basin, NW Yukon	Kathul Greywacke	mid Cretaceous	EPMA
1132	091-11	698NC	7	0.0714	0.160154	1.68897	2.27155	0.0887539	0.582584	age	Kandik Basin, NW Yukon	Kathul Greywacke	mid Cretaceous	EPMA
1133	091-11	698NC	8	0.1302	0.250766	2.26804	2.56664	0.120566	0.298596	age	Kandik Basin, NW Yukon	Kathul Greywacke	mid Cretaceous	EPMA
1134	091-11	698NC	9	0.0048	-0.0162357	1.65902	1.69713	0.0210357	0.0381113	age	Kandik Basin, NW Yukon	Kathul Greywacke	mid Cretaceous	EPMA
1135	091-11	698NC	10	0.2263	0.261844	2.21812	2.60271	0.035544	0.384593	age	Kandik Basin, NW Yukon	Kathul Greywacke	mid Cretaceous	EPMA
1136	091-11	698NC	13	0.3144	0.342667	1.62906	2.86592	0.0282666	1.23685	age	Kandik Basin, NW Yukon	Kathul Greywacke	mid Cretaceous	EPMA
1137	091-11	698NC	14	0.1496	0.281451	2.37786	2.66656	0.131851	0.288701	age	Kandik Basin, NW Yukon	Kathul Greywacke	mid Cretaceous	EPMA
1138	091-11	698NC	15	0.1336	0.294725	1.87866	2.70979	0.161125	0.83113	age	Kandik Basin, NW Yukon	Kathul Greywacke	mid Cretaceous	EPMA
1139	091-11	698NC	16	0.2409	0.314272	2.54759	2.77345	0.0733723	0.225857	age	Kandik Basin, NW Yukon	Kathul Greywacke	mid Cretaceous	EPMA
1140	091-11	698NC	17	0.0854	0.13869	1.84871	2.20165	0.0532904	0.352943	age	Kandik Basin, NW Yukon	Kathul Greywacke	mid Cretaceous	EPMA
1141	091-11	698NC	18	0.1053	0.239243	1.53921	2.52911	0.133943	0.989905	age	Kandik Basin, NW Yukon	Kathul Greywacke	mid Cretaceous	EPMA
1142	091-11	698NC	19	0.1587	0.171672	1.83873	2.30906	0.0129715	0.470332	age	Kandik Basin, NW Yukon	Kathul Greywacke	mid Cretaceous	EPMA
1143	091-11	698NC	20	0.1987	0.225037	1.73889	2.48285	0.0263369	0.74396	age	Kandik Basin, NW Yukon	Kathul Greywacke	mid Cretaceous	EPMA
1144	091-11	698NC	21	0.1111	0.182714	1.9785	2.34502	0.0716142	0.366517	age	Kandik Basin, NW Yukon	Kathul Greywacke	mid Cretaceous	EPMA
1145	091-11	698NC	22	0.1183	0.142446	1.83873	2.21388	0.0241458	0.375157	age	Kandik Basin, NW Yukon	Kathul Greywacke	mid Cretaceous	EPMA
1146	091-11	698NC	23	0.0026	0.0504706	2.43777	1.91436	0.0478706	0.523407	age	Kandik Basin, NW Yukon	Kathul Greywacke	mid Cretaceous	EPMA
1147	091-11	698NC	24	0.0797	0.151814	1.63905	2.24439	0.0721141	0.605345	age	Kandik Basin, NW Yukon	Kathul Greywacke	mid Cretaceous	EPMA
1148	091-11	698NC	25	0.2101	0.300596	2.00846	2.72891	0.0904956	0.720454	age	Kandik Basin, NW Yukon	Kathul Greywacke	mid Cretaceous	EPMA
1149	091-11	698NC	26	0.2664	0.397524	2.33793	3.04456	0.131124	0.706636	age	Kandik Basin, NW Yukon	Kathul Greywacke	mid Cretaceous	EPMA
1150	091-11	698NC	27	0.0887	0.182916	1.70894	2.34568	0.0942163	0.636743	age	Kandik Basin, NW Yukon	Kathul Greywacke	mid Cretaceous	EPMA
1151	091-11	698NC	28	0.1555	0.222069	1.77882	2.47318	0.0665695	0.69436	age	Kandik Basin, NW Yukon	Kathul Greywacke	mid Cretaceous	EPMA
1152	091-11	698NC	29	0.1728	0.311507	1.33953	2.76444	0.138707	1.42491	age	Kandik Basin, NW Yukon	Kathul Greywacke	mid Cretaceous	EPMA
1153	091-11	698NC	30	0.1178	0.237986	1.89863	2.52502	0.120186	0.626385	age	Kandik Basin, NW Yukon	Kathul Greywacke	mid Cretaceous	EPMA
1154	091-11	698NC	31	0.1351	0.225407	2.11828	2.48405	0.0903066	0.365772	age	Kandik Basin, NW Yukon	Kathul Greywacke	mid Cretaceous	EPMA
1155	091-11	698NC	32	0.0069	0.0698343	2.02842	1.97742	0.0629343	0.0510037	age	Kandik Basin, NW Yukon	Kathul Greywacke	mid Cretaceous	EPMA
1156	091-11	698NC	34	0.3798	0.449697	2.53761	3.21447	0.0698966	0.67686	age	Kandik Basin, NW Yukon	Kathul Greywacke	mid Cretaceous	EPMA
1157	091-11	698NC	35	0.1174	0.238345	2.18817	2.52619	0.120945	0.33802	age	Kandik Basin, NW Yukon	Kathul Greywacke	mid Cretaceous	EPMA
1158	091-11	698NC	36	0.0814	0.073156	1.73889	1.98824	0.00824403	0.249349	age	Kandik Basin, NW Yukon	Kathul Greywacke	mid Cretaceous	EPMA
1159	091-11	698NC	37	0.2879	0.393393	2.2281	3.03111	0.105493	0.803006	age	Kandik Basin, NW Yukon	Kathul Greywacke	mid Cretaceous	EPMA
1160	091-11	698NC	39	0.1652	0.190533	2.27802	2.37048	0.0253326	0.0924586	age	Kandik Basin, NW Yukon	Kathul Greywacke	mid Cretaceous	EPMA
1161	091-11	698NC	40	0.3488	0.37177	2.98689	2.9607	0.0229705	0.0261919	age	Kandik Basin, NW Yukon	Kathul Greywacke	mid Cretaceous	EPMA
1162	091-11	698NC	1	0.0719	0.193506	1.64903	2.38016	0.121606	0.731133	length	Kandik Basin, NW Yukon	Kathul Greywacke	mid Cretaceous	EPMA
1163	091-11	698NC	2	0.2167	0.231282	1.78881	2.50319	0.0145819	0.714377	length	Kandik Basin, NW Yukon	Kathul Greywacke	mid Cretaceous	EPMA
1164	091-11	698NC	3	0.0607	0.172705	1.74887	2.31243	0.112005	0.563553	length	Kandik Basin, NW Yukon	Kathul Greywacke	mid Cretaceous	EPMA
1165	091-11	698NC	4	0.0104	-0.029641	1.4194	1.65347	0.040041	0.234072	length	Kandik Basin, NW Yukon	Kathul Greywacke	mid Cretaceous	EPMA
1166	091-11	698NC	5	0.2619	0.286188	2.76724	2.68199	0.0242882	0.0852485	length	Kandik Basin, NW Yukon	Kathul Greywacke	mid Cretaceous	EPMA
1167	091-11	698NC	6	0.1266	0.0889318	2.08833	2.03961	0.0376682	0.0487155	length	Kandik Basin, NW Yukon	Kathul Greywacke	mid Cretaceous	EPMA
1168	091-11	698NC	8	0.2084	0.321569	2.15822	2.79721	0.113169	0.638997	length	Kandik Basin, NW Yukon	Kathul Greywacke	mid Cretaceous	EPMA
1169	091-11	698NC	11	0.1753	0.267457	2.01844	2.62099	0.0921567	0.602551	length	Kandik Basin, NW Yukon	Kathul Greywacke	mid Cretaceous	EPMA
1170	091-11	698NC	12	0.0915	0.173118	2.00846	2.31377	0.0816176	0.305313	length	Kandik Basin, NW Yukon	Kathul Greywacke	mid Cretaceous	EPMA
1171	091-11	698NC	13	0.0681	0.196067	1.71892	2.38851	0.127967	0.669587	length	Kandik Basin, NW Yukon	Kathul Greywacke	mid Cretaceous	EPMA
1172	091-11	698NC	14	0.32	0.342667	2.58753	2.86592	0.0226666	0.278389	length	Kandik Basin, NW Yukon	Kathul Greywacke	mid Cretaceous	EPMA
1173	091-11	698NC	15	0.0154	0.0190024	2.00846	1.81188	0.00360242	0.196573	length	Kandik Basin, NW Yukon	Kathul Greywacke	mid Cretaceous	EPMA
1174	091-11	698NC	16	0.2166	0.312738	2.27802	2.76845	0.0961378	0.490428	length	Kandik Basin, NW Yukon	Kathul Greywacke	mid Cretaceous	EPMA
1175	091-11	698NC	17	0.0368	0.0896701	2.03841	2.04202	0.0528701	0.00360886	length	Kandik Basin, NW Yukon	Kathul Greywacke	mid Cretaceous	EPMA
1176	091-11	698NC	18	0.0086	0.0654553	1.94855	1.96316	0.0568553	0.0146076	length	Kandik Basin, NW Yukon	Kathul Greywacke	mid Cretaceous	EPMA
1177	091-11	698NC	20	0.0681	0.115046	2.08833	2.12466	0.046946	0.0363273	length	Kandik Basin, NW Yukon	Kathul Greywacke	mid Cretaceous	EPMA
1178	091-11	698NC	21	0.2176	0.229087	2.1682	2.49604	0.0114871	0.327838	length	Kandik Basin, NW Yukon	Kathul Greywacke	mid Cretaceous	EPMA
1179	091-11	698NC	24	0.1249	0.25024	2.3579	2.56492	0.12534	0.207028	length	Kandik Basin, NW Yukon	Kathul Greywacke	mid Cretaceous	EPMA
1180	091-11	698NC	25	0.1434	0.242284	2.23809	2.53901	0.0988841	0.300927	length	Kandik Basin, NW Yukon	Kathul Greywacke	mid Cretaceous	EPMA
1181	091-11	698NC	26	0.2592	0.17702	2.29799	2.32648	0.0821795	0.0284873	length	Kandik Basin, NW Yukon	Kathul Greywacke	mid Cretaceous	EPMA
1182	091-11	698NC	27	0.1583	0.263381	1.96852	2.60772	0.105081	0.639199	length	Kandik Basin, NW Yukon	Kathul Greywacke	mid Cretaceous	EPMA
1183	091-11	698NC	29	0.1323	0.149652	1.94855	2.23735	0.0173519	0.2888	length	Kandik Basin, NW Yukon	Kathul Greywacke	mid Cretaceous	EPMA
1184	091-13	W Parkin D-54	1	0.1049	0.268133	1.48929	2.62319	0.163233	1.1339	age	Eagle Plain, N. Yukon	Eagle Plain Group	Upper Cretaceous	EPMA
1185	091-13	W Parkin D-54	2	0	0.15888	2.1083	2.2674	0.15888	0.159109	age	Eagle Plain, N. Yukon	Eagle Plain Group	Upper Cretaceous	EPMA
1186	091-13	W Parkin D-54	6	0.004	0.110596	2.14823	2.11016	0.106596	0.0380679	age	Eagle Plain, N. Yukon	Eagle Plain Group	Upper Cretaceous	EPMA
1187	091-13	W Parkin D-54	13	0.0165	0.110125	3.30638	2.10863	0.0936253	1.19775	age	Eagle Plain, N. Yukon	Eagle Plain Group	Upper Cretaceous	EPMA
1188	091-13	W Parkin D-54	14	0.0028	0.0175733	2.07834	1.80723	0.0147733	0.271115	age	Eagle Plain, N. Yukon	Eagle Plain Group	Upper Cretaceous	EPMA
1189	091-13	W Parkin D-54	18	0.0022	-0.0496614	1.669	1.58827	0.0518614	0.0807259	age	Eagle Plain, N. Yukon	Eagle Plain Group	Upper Cretaceous	EPMA
1190	091-13	W Parkin D-54	19	0.0242	0.20982	1.68897	2.43329	0.18562	0.744324	age	Eagle Plain, N. Yukon	Eagle Plain Group	Upper Cretaceous	EPMA
1191	091-13	W Parkin D-54	20	0.0052	0.0777171	1.82874	2.00309	0.0725171	0.174347	age	Eagle Plain, N. Yukon	Eagle Plain Group	Upper Cretaceous	EPMA
1192	091-13	W Parkin D-54	22	0.0794	0.17353	2.00846	2.31511	0.0941299	0.306656	age	Eagle Plain, N. Yukon	Eagle Plain Group	Upper Cretaceous	EPMA
1193	091-13	W Parkin D-54	23	0.0263	0.132889	1.61908	2.18276	0.106589	0.563682	age	Eagle Plain, N. Yukon	Eagle Plain Group	Upper Cretaceous	EPMA
1194	091-13	W Parkin D-54	24	0.0283	0.0602512	1.9186	1.94621	0.0319512	0.0276121	age	Eagle Plain, N. Yukon	Eagle Plain Group	Upper Cretaceous	EPMA
1195	091-13	W Parkin D-54	25	0.1439	0.346833	2.19815	2.87949	0.202933	0.681333	age	Eagle Plain, N. Yukon	Eagle Plain Group	Upper Cretaceous	EPMA
1196	091-13	W Parkin D-54	26	0.0228	0.181297	1.51924	2.34041	0.158497	0.821167	age	Eagle Plain, N. Yukon	Eagle Plain Group	Upper Cretaceous	EPMA
1197	091-13	W Parkin D-54	27	0.1053	0.285863	2.08833	2.68093	0.180563	0.592605	age	Eagle Plain, N. Yukon	Eagle Plain Group	Upper Cretaceous	EPMA
1198	091-13	W Parkin D-54	28	0.0569	0.138912	1.78881	2.20238	0.0820122	0.413569	age	Eagle Plain, N. Yukon	Eagle Plain Group	Upper Cretaceous	EPMA
1199	091-13	W Parkin D-54	31	0.1294	0.34669	2.79719	2.87902	0.21729	0.0818276	age	Eagle Plain, N. Yukon	Eagle Plain Group	Upper Cretaceous	EPMA
1200	091-13	W Parkin D-54	32	0.0047	0.0607742	2.12826	1.94792	0.0560742	0.180349	age	Eagle Plain, N. Yukon	Eagle Plain Group	Upper Cretaceous	EPMA
1201	091-13	W Parkin D-54	33	0.2481	0.252165	2.25806	2.57119	0.00406479	0.313136	age	Eagle Plain, N. Yukon	Eagle Plain Group	Upper Cretaceous	EPMA
1202	091-13	W Parkin D-54	34	0.003	0.0693212	2.34791	1.97575	0.0663212	0.372163	age	Eagle Plain, N. Yukon	Eagle Plain Group	Upper Cretaceous	EPMA
1203	091-13	W Parkin D-54	35	0.1876	0.303112	2.37786	2.7371	0.115512	0.35924	age	Eagle Plain, N. Yukon	Eagle Plain Group	Upper Cretaceous	EPMA
1204	091-13	W Parkin D-54	37	0.0154	0.0280482	1.98849	1.84134	0.0126482	0.147147	age	Eagle Plain, N. Yukon	Eagle Plain Group	Upper Cretaceous	EPMA
1205	091-13	W Parkin D-54	38	0.0091	0.0904073	1.37946	2.04442	0.0813073	0.664953	age	Eagle Plain, N. Yukon	Eagle Plain Group	Upper Cretaceous	EPMA
1206	091-13	W Parkin D-54	39	0.4093	0.374207	2.62746	2.96863	0.0350929	0.341167	age	Eagle Plain, N. Yukon	Eagle Plain Group	Upper Cretaceous	EPMA
1207	091-13	W Parkin D-54	40	0.0798	0.0442875	1.62906	1.89423	0.0355125	0.265161	age	Eagle Plain, N. Yukon	Eagle Plain Group	Upper Cretaceous	EPMA
1208	091-13	W Parkin D-54	1	0.1005	0.288458	2.43777	2.68938	0.187958	0.251616	length	Eagle Plain, N. Yukon	Eagle Plain Group	Upper Cretaceous	EPMA
1209	091-13	W Parkin D-54	3	0.0022	0.142886	2.4178	2.21532	0.140686	0.202483	length	Eagle Plain, N. Yukon	Eagle Plain Group	Upper Cretaceous	EPMA
1210	091-13	W Parkin D-54	4	0.0033	0.0305616	1.94855	1.84953	0.0272616	0.099026	length	Eagle Plain, N. Yukon	Eagle Plain Group	Upper Cretaceous	EPMA
1211	091-13	W Parkin D-54	5	0.0019	0.067521	1.93857	1.96989	0.065621	0.0313189	length	Eagle Plain, N. Yukon	Eagle Plain Group	Upper Cretaceous	EPMA
1212	091-13	W Parkin D-54	7	0.0045	0.100128	2.45774	2.07607	0.0956282	0.381662	length	Eagle Plain, N. Yukon	Eagle Plain Group	Upper Cretaceous	EPMA
1213	091-13	W Parkin D-54	8	0.0149	0.124965	4.13505	2.15696	0.110065	1.97809	length	Eagle Plain, N. Yukon	Eagle Plain Group	Upper Cretaceous	EPMA
1214	091-13	W Parkin D-54	9	0	0.00948976	1.77882	1.7809	0.00948976	0.00208005	length	Eagle Plain, N. Yukon	Eagle Plain Group	Upper Cretaceous	EPMA
1215	091-13	W Parkin D-54	11	0.0049	0.0741733	1.67898	1.99155	0.0692733	0.312567	length	Eagle Plain, N. Yukon	Eagle Plain Group	Upper Cretaceous	EPMA
1216	091-13	W Parkin D-54	13	0.0944	0.13669	1.89863	2.19514	0.0422902	0.296509	length	Eagle Plain, N. Yukon	Eagle Plain Group	Upper Cretaceous	EPMA
1217	091-13	W Parkin D-54	14	0.2094	0.344826	2.11828	2.87295	0.135426	0.75467	length	Eagle Plain, N. Yukon	Eagle Plain Group	Upper Cretaceous	EPMA
1218	091-13	W Parkin D-54	15	0.1374	0.325775	2.67738	2.81091	0.188375	0.133524	length	Eagle Plain, N. Yukon	Eagle Plain Group	Upper Cretaceous	EPMA
1219	091-13	W Parkin D-54	16	0.0958	0.289428	2.1083	2.69254	0.193628	0.584246	length	Eagle Plain, N. Yukon	Eagle Plain Group	Upper Cretaceous	EPMA
1220	091-13	W Parkin D-54	17	0.028	0.0729013	2.06836	1.98741	0.0449013	0.080952	length	Eagle Plain, N. Yukon	Eagle Plain Group	Upper Cretaceous	EPMA
1221	091-13	W Parkin D-54	18	0.0469	0.0499361	1.81876	1.91262	0.00303608	0.0938603	length	Eagle Plain, N. Yukon	Eagle Plain Group	Upper Cretaceous	EPMA
1222	091-13	W Parkin D-54	20	0.1211	0.318846	2.49767	2.78834	0.197746	0.290672	length	Eagle Plain, N. Yukon	Eagle Plain Group	Upper Cretaceous	EPMA
1223	091-13	W Parkin D-54	21	0.0116	0.0923674	1.90862	2.0508	0.0807674	0.142185	length	Eagle Plain, N. Yukon	Eagle Plain Group	Upper Cretaceous	EPMA
1224	091-13	W Parkin D-54	22	0.4079	0.354917	3.03681	2.90581	0.0529829	0.130996	length	Eagle Plain, N. Yukon	Eagle Plain Group	Upper Cretaceous	EPMA
1225	091-13	W Parkin D-54	23	0.0712	0.0453686	1.65902	1.89775	0.0258314	0.23873	length	Eagle Plain, N. Yukon	Eagle Plain Group	Upper Cretaceous	EPMA
1226	091-15	Ehnjuu Choo B-73	2	0.0769	0.170636	1.7289	2.30569	0.093736	0.576784	age	Eagle Plain, N. Yukon	Hart River	Carboniferous	EPMA
1227	091-15	Ehnjuu Choo B-73	1	0.0079	0.0906527	1.64903	2.04522	0.0827527	0.396185	length	Eagle Plain, N. Yukon	Hart River	Carboniferous	EPMA
1228	091-15	Ehnjuu Choo B-73	2	0.0804	0.204444	2.07834	2.41579	0.124044	0.337441	length	Eagle Plain, N. Yukon	Hart River	Carboniferous	EPMA
1229	091-16	2008LHA5-6A	2	0.0233	0.100369	1.94855	2.07686	0.0770687	0.128306	age	Richardson Mts., N. Yukon	Imperial	Upper Devonian	EPMA
1230	091-16	2008LHA5-6A	3	0.0043	0.020996	1.51924	1.81837	0.016696	0.299135	age	Richardson Mts., N. Yukon	Imperial	Upper Devonian	EPMA
1231	091-16	2008LHA5-6A	5	0.0204	0.00451386	1.44935	1.7647	0.0158861	0.315348	age	Richardson Mts., N. Yukon	Imperial	Upper Devonian	EPMA
1232	091-16	2008LHA5-6A	6	0.1384	0.141785	2.1083	2.21173	0.00338523	0.103437	age	Richardson Mts., N. Yukon	Imperial	Upper Devonian	EPMA
1233	091-16	2008LHA5-6A	9	0.0048	-0.0473583	1.69895	1.59577	0.0521583	0.103178	age	Richardson Mts., N. Yukon	Imperial	Upper Devonian	EPMA
1234	091-16	2008LHA5-6A	13	0.0417	0.255818	1.8587	2.58309	0.214118	0.724392	age	Richardson Mts., N. Yukon	Imperial	Upper Devonian	EPMA
1235	091-16	2008LHA5-6A	14	0.0333	0.149652	1.81876	2.23735	0.116352	0.418592	age	Richardson Mts., N. Yukon	Imperial	Upper Devonian	EPMA
1236	091-16	2008LHA5-6A	20	0.0351	0.049401	1.84871	1.91088	0.014301	0.0621658	age	Richardson Mts., N. Yukon	Imperial	Upper Devonian	EPMA
1237	091-16	2008LHA5-6A	21	0.0189	0.211535	1.88865	2.43888	0.192635	0.550229	age	Richardson Mts., N. Yukon	Imperial	Upper Devonian	EPMA
1238	091-16	2008LHA5-6A	22	0	0.0726465	1.71892	1.98658	0.0726465	0.267658	age	Richardson Mts., N. Yukon	Imperial	Upper Devonian	EPMA
1239	091-16	2008LHA5-6A	24	0.0896	0.184731	2.02842	2.35159	0.0951312	0.323166	age	Richardson Mts., N. Yukon	Imperial	Upper Devonian	EPMA
1240	091-16	2008LHA5-6A	27	0.0032	-0.0480152	1.6091	1.59364	0.0512152	0.0154608	age	Richardson Mts., N. Yukon	Imperial	Upper Devonian	EPMA
1241	091-16	2008LHA5-6A	28	0.2227	0.209438	1.74887	2.43205	0.0132624	0.683176	age	Richardson Mts., N. Yukon	Imperial	Upper Devonian	EPMA
1242	091-16	2008LHA5-6A	30	0.0706	0.0716258	2.08833	1.98325	0.00102579	0.105074	age	Richardson Mts., N. Yukon	Imperial	Upper Devonian	EPMA
1243	091-16	2008LHA5-6A	31	0.0258	0.0308401	2.17818	1.85043	0.00504007	0.327751	age	Richardson Mts., N. Yukon	Imperial	Upper Devonian	EPMA
1244	091-16	2008LHA5-6A	32	0.0078	-0.029641	1.6	1.65347	0.037441	0.0534721	age	Richardson Mts., N. Yukon	Imperial	Upper Devonian	EPMA
1245	091-16	2008LHA5-6A	33	0.006	0.0931004	1.94855	2.05319	0.0871004	0.104636	age	Richardson Mts., N. Yukon	Imperial	Upper Devonian	EPMA
1246	091-16	2008LHA5-6A	36	0.0281	0.125422	2.34791	2.15844	0.0973217	0.189468	age	Richardson Mts., N. Yukon	Imperial	Upper Devonian	EPMA
1247	091-16	2008LHA5-6A	37	0.0176	0.0147021	1.64903	1.79788	0.00289789	0.148846	age	Richardson Mts., N. Yukon	Imperial	Upper Devonian	EPMA
1248	091-16	2008LHA5-6A	38	0.0106	-0.00499646	1.65902	1.73373	0.0155965	0.0747127	age	Richardson Mts., N. Yukon	Imperial	Upper Devonian	EPMA
1249	091-16	2008LHA5-6A	40	0.2331	0.357721	1.95854	2.91494	0.124621	0.956408	age	Richardson Mts., N. Yukon	Imperial	Upper Devonian	EPMA
1250	091-16	2008LHA5-6A	1	0.0669	0.0711146	1.9186	1.98159	0.00421464	0.0629897	length	Richardson Mts., N. Yukon	Imperial	Upper Devonian	EPMA
1251	091-16	2008LHA5-6A	2	0.0358	0.0499361	1.82874	1.91262	0.0141361	0.0838763	length	Richardson Mts., N. Yukon	Imperial	Upper Devonian	EPMA
1252	091-16	2008LHA5-6A	3	0.0243	0.00627602	1.669	1.77044	0.018024	0.101438	length	Richardson Mts., N. Yukon	Imperial	Upper Devonian	EPMA
1253	091-16	2008LHA5-6A	4	0.0403	0.07696	1.93857	2.00063	0.03666	0.0620574	length	Richardson Mts., N. Yukon	Imperial	Upper Devonian	EPMA
1254	091-16	2008LHA5-6A	6	0.1051	0.0962637	1.8587	2.06349	0.00883631	0.204793	length	Richardson Mts., N. Yukon	Imperial	Upper Devonian	EPMA
1255	091-16	2008LHA5-6A	7	0.0329	0.162058	1.96852	2.27775	0.129158	0.309232	length	Richardson Mts., N. Yukon	Imperial	Upper Devonian	EPMA
1256	091-16	2008LHA5-6A	8	0.0256	0.145516	3.6658	2.22388	0.119916	1.44192	length	Richardson Mts., N. Yukon	Imperial	Upper Devonian	EPMA
1257	091-16	2008LHA5-6A	9	0.1674	0.145298	2.11828	2.22317	0.0221024	0.104892	length	Richardson Mts., N. Yukon	Imperial	Upper Devonian	EPMA
1258	091-16	2008LHA5-6A	10	0.0092	-0.0246086	2.01844	1.66986	0.0338086	0.34858	length	Richardson Mts., N. Yukon	Imperial	Upper Devonian	EPMA
1259	091-16	2008LHA5-6A	11	0.0286	0.0904073	1.92858	2.04442	0.0618073	0.115833	length	Richardson Mts., N. Yukon	Imperial	Upper Devonian	EPMA
1260	091-16	2008LHA5-6A	12	0.0425	0.0502034	1.95854	1.91349	0.00770339	0.0450452	length	Richardson Mts., N. Yukon	Imperial	Upper Devonian	EPMA
1261	091-16	2008LHA5-6A	14	0.2395	0.276832	2.03841	2.65152	0.037332	0.613114	length	Richardson Mts., N. Yukon	Imperial	Upper Devonian	EPMA
1262	091-16	2008LHA5-6A	15	0.0529	0.0464473	1.59911	1.90126	0.00645271	0.302147	length	Richardson Mts., N. Yukon	Imperial	Upper Devonian	EPMA
1263	091-16	2008LHA5-6A	16	0.0651	0.0610355	1.95854	1.94877	0.00406455	0.00976985	length	Richardson Mts., N. Yukon	Imperial	Upper Devonian	EPMA
1264	091-16	2008LHA5-6A	17	0.002	0.25651	1.64903	2.58534	0.25451	0.936311	length	Richardson Mts., N. Yukon	Imperial	Upper Devonian	EPMA
1265	1237-01	2006LHA1-4B	1	0.0156	0.42244	1.89863	3.1257	0.40684	1.22707	age	eastern Eagle Plain, N. Yukon	Imperial	Upper Devonian	EPMA
1266	1237-01	2006LHA1-4B	2	0	-0.038256	1.89863	1.62542	0.038256	0.273215	age	eastern Eagle Plain, N. Yukon	Imperial	Upper Devonian	EPMA
1267	1237-01	2006LHA1-4B	3	0.1541	0.309654	2.20814	2.75841	0.155554	0.550273	age	eastern Eagle Plain, N. Yukon	Imperial	Upper Devonian	EPMA
1268	1237-01	2006LHA1-4B	4	0.0836	0.279312	2.63745	2.6596	0.195712	0.0221509	age	eastern Eagle Plain, N. Yukon	Imperial	Upper Devonian	EPMA
1269	1237-01	2006LHA1-4B	5	0	0.0238295	2.19815	1.8276	0.0238295	0.37055	age	eastern Eagle Plain, N. Yukon	Imperial	Upper Devonian	EPMA
1270	1237-01	2006LHA1-4B	6	0.0392	0.109654	1.80878	2.1071	0.070454	0.29832	age	eastern Eagle Plain, N. Yukon	Imperial	Upper Devonian	EPMA
1271	1237-01	2006LHA1-4B	7	0.1155	0.215324	2.26804	2.45122	0.099824	0.183177	age	eastern Eagle Plain, N. Yukon	Imperial	Upper Devonian	EPMA
1272	1237-01	2006LHA1-4B	8	0.0579	0.115046	1.71892	2.12466	0.057146	0.405735	age	eastern Eagle Plain, N. Yukon	Imperial	Upper Devonian	EPMA
1273	1237-01	2006LHA1-4B	9	0.0134	0.0170005	2.37786	1.80536	0.00360046	0.572501	age	eastern Eagle Plain, N. Yukon	Imperial	Upper Devonian	EPMA
1274	1237-01	2006LHA1-4B	10	0.0097	-0.0380084	1.96852	1.62622	0.0477084	0.342297	age	eastern Eagle Plain, N. Yukon	Imperial	Upper Devonian	ICPMS
1275	1237-01	2006LHA1-4B	11	0.4535	0.334504	3.79559	2.83933	0.118996	0.956257	age	eastern Eagle Plain, N. Yukon	Imperial	Upper Devonian	ICPMS
1276	1237-01	2006LHA1-4B	12	0.0239	0.279807	2.01	2.66121	0.255907	0.651209	age	eastern Eagle Plain, N. Yukon	Imperial	Upper Devonian	EPMA
1277	1237-01	2006LHA1-4B	13	0.0924	0.07696	2.31796	2.00063	0.01544	0.317335	age	eastern Eagle Plain, N. Yukon	Imperial	Upper Devonian	EPMA
1278	1237-01	2006LHA1-4B	14	0.0925	0.203864	2.6674	2.4139	0.111364	0.253503	age	eastern Eagle Plain, N. Yukon	Imperial	Upper Devonian	EPMA
1279	1237-01	2006LHA1-4B	15	0.0752	0.166262	2.77722	2.29144	0.0910616	0.485782	age	eastern Eagle Plain, N. Yukon	Imperial	Upper Devonian	EPMA
1280	1237-01	2006LHA1-4B	16	0.4235	0.413202	2.76724	3.09562	0.0102975	0.328382	age	eastern Eagle Plain, N. Yukon	Imperial	Upper Devonian	EPMA
1281	1237-01	2006LHA1-4B	17	0.0124	0.178042	3.33633	2.32981	0.165642	1.00652	age	eastern Eagle Plain, N. Yukon	Imperial	Upper Devonian	EPMA
1282	1237-01	2006LHA1-4B	18	0.0825	0.0584162	1.87866	1.94024	0.0240838	0.0615724	age	eastern Eagle Plain, N. Yukon	Imperial	Upper Devonian	EPMA
1283	1237-01	2006LHA1-4B	19	0.008	0.0164269	1.76884	1.8035	0.00842691	0.0346554	age	eastern Eagle Plain, N. Yukon	Imperial	Upper Devonian	EPMA
1284	1237-01	2006LHA1-4B	20	0	0.232739	1.79879	2.50793	0.232739	0.70914	age	eastern Eagle Plain, N. Yukon	Imperial	Upper Devonian	EPMA
1285	1237-01	2006LHA1-4B	21	0.0177	0.00510198	1.92858	1.76661	0.012598	0.161969	age	eastern Eagle Plain, N. Yukon	Imperial	Upper Devonian	EPMA
1286	1237-01	2006LHA1-4B	22	0.0961	0.0461779	1.93857	1.90038	0.0499221	0.0381866	age	eastern Eagle Plain, N. Yukon	Imperial	Upper Devonian	EPMA
1287	1237-01	2006LHA1-4B	23	0	0.106579	2.28801	2.09708	0.106579	0.190926	age	eastern Eagle Plain, N. Yukon	Imperial	Upper Devonian	EPMA
1288	1237-01	2006LHA1-4B	24	0.0028	0.0504706	2.33793	1.91436	0.0476706	0.423567	age	eastern Eagle Plain, N. Yukon	Imperial	Upper Devonian	EPMA
1289	1237-01	2006LHA1-4B	25	0.0268	0.0232641	2.04	1.82576	0.00353587	0.214239	age	eastern Eagle Plain, N. Yukon	Imperial	Upper Devonian	EPMA
1290	1237-01	2006LHA1-4B	26	0.0279	0.0429327	1.98849	1.88981	0.0150327	0.0986749	age	eastern Eagle Plain, N. Yukon	Imperial	Upper Devonian	EPMA
1291	1237-01	2006LHA1-4B	27	0.0065	0.0442875	2.04839	1.89423	0.0377875	0.154167	age	eastern Eagle Plain, N. Yukon	Imperial	Upper Devonian	EPMA
1292	1237-01	2006LHA1-4B	28	0.011	0.043746	1.77882	1.89246	0.032746	0.113638	age	eastern Eagle Plain, N. Yukon	Imperial	Upper Devonian	EPMA
1293	1237-01	2006LHA1-4B	29	0.1997	0.279312	3.36628	2.6596	0.0796121	0.706681	age	eastern Eagle Plain, N. Yukon	Imperial	Upper Devonian	EPMA
1294	1237-01	2006LHA1-4B	30	0.0063	0.00539576	1.81876	1.76757	0.00090424	0.0511883	age	eastern Eagle Plain, N. Yukon	Imperial	Upper Devonian	EPMA
1295	1237-01	2006LHA1-4B	31	0.0193	0.0224148	1.8587	1.823	0.00311484	0.0357005	age	eastern Eagle Plain, N. Yukon	Imperial	Upper Devonian	EPMA
1296	1237-01	2006LHA1-4B	32	0.0369	0.14835	1.87866	2.23311	0.11145	0.354447	age	eastern Eagle Plain, N. Yukon	Imperial	Upper Devonian	EPMA
1297	1237-01	2006LHA1-4B	33	0.0772	0.142666	2.01844	2.2146	0.0654658	0.196161	age	eastern Eagle Plain, N. Yukon	Imperial	Upper Devonian	EPMA
1298	1237-01	2006LHA1-4B	34	0.0561	0.151586	2.39783	2.24365	0.095486	0.154182	age	eastern Eagle Plain, N. Yukon	Imperial	Upper Devonian	ICPMS
1299	1237-01	2006LHA1-4B	35	0.4203	0.330147	2.04839	2.82515	0.0901528	0.776755	age	eastern Eagle Plain, N. Yukon	Imperial	Upper Devonian	ICPMS
1300	1237-01	2006LHA1-4B	36	0.4347	0.320876	3.67578	2.79495	0.113824	0.880831	age	eastern Eagle Plain, N. Yukon	Imperial	Upper Devonian	ICPMS
1301	1237-01	2006LHA1-4B	37	0.0453	0.146172	2.54759	2.22602	0.100872	0.321574	age	eastern Eagle Plain, N. Yukon	Imperial	Upper Devonian	EPMA
1302	1237-01	2006LHA1-4B	38	0.0351	0.0695779	1.85	1.97659	0.0344779	0.126585	age	eastern Eagle Plain, N. Yukon	Imperial	Upper Devonian	EPMA
1303	1237-01	2006LHA1-4B	39	0.0792	0.080483	2.02842	2.0121	0.00128305	0.0163254	age	eastern Eagle Plain, N. Yukon	Imperial	Upper Devonian	EPMA
1304	1237-01	2006LHA1-4B	40	0.0102	0.0221314	2.01844	1.82207	0.0119314	0.196368	age	eastern Eagle Plain, N. Yukon	Imperial	Upper Devonian	EPMA
1305	1237-01	2006LHA1-4B	1	0.16	0.12883	2.46772	2.16955	0.0311696	0.298175	length	eastern Eagle Plain, N. Yukon	Imperial	Upper Devonian	EPMA
1306	1237-01	2006LHA1-4B	2	0.0464	0.143764	2.56756	2.21818	0.0973641	0.349382	length	eastern Eagle Plain, N. Yukon	Imperial	Upper Devonian	EPMA
1307	1237-01	2006LHA1-4B	3	0.355	0.273338	2.4777	2.64014	0.0816621	0.16244	length	eastern Eagle Plain, N. Yukon	Imperial	Upper Devonian	EPMA
1308	1237-01	2006LHA1-4B	4	0	0.00215409	2.21812	1.75701	0.00215409	0.461105	length	eastern Eagle Plain, N. Yukon	Imperial	Upper Devonian	EPMA
1309	1237-01	2006LHA1-4B	5	0.0375	0.0121031	2.37786	1.78941	0.0253969	0.588449	length	eastern Eagle Plain, N. Yukon	Imperial	Upper Devonian	EPMA
1310	1237-01	2006LHA1-4B	6	0.0043	0.0192877	2.01844	1.81281	0.0149877	0.205628	length	eastern Eagle Plain, N. Yukon	Imperial	Upper Devonian	EPMA
1311	1237-01	2006LHA1-4B	7	0.0115	0.0536648	2.1083	1.92476	0.0421648	0.183533	length	eastern Eagle Plain, N. Yukon	Imperial	Upper Devonian	EPMA
1312	1237-01	2006LHA1-4B	8	0.007	0.155895	1.92858	2.25768	0.148895	0.3291	length	eastern Eagle Plain, N. Yukon	Imperial	Upper Devonian	EPMA
1313	1237-01	2006LHA1-4B	9	0.0105	0.020996	2.09831	1.81837	0.010496	0.279937	length	eastern Eagle Plain, N. Yukon	Imperial	Upper Devonian	EPMA
1314	1237-01	2006LHA1-4B	10	0.0073	0.0327846	2.15822	1.85677	0.0254846	0.301451	length	eastern Eagle Plain, N. Yukon	Imperial	Upper Devonian	EPMA
1315	1237-01	2006LHA1-4B	11	0.54326	0.35684	3.82554	2.91207	0.18642	0.91347	length	eastern Eagle Plain, N. Yukon	Imperial	Upper Devonian	ICPMS
1316	1237-01	2006LHA1-4B	12	0.0231	0.173942	4.96372	2.31645	0.150842	2.64727	length	eastern Eagle Plain, N. Yukon	Imperial	Upper Devonian	EPMA
1317	1237-01	2006LHA1-4B	13	0.0225	0.285863	2.34791	2.68093	0.263363	0.333021	length	eastern Eagle Plain, N. Yukon	Imperial	Upper Devonian	EPMA
1318	1237-01	2006LHA1-4B	14	0.0657	0.0429327	2.13825	1.88981	0.0227673	0.248435	length	eastern Eagle Plain, N. Yukon	Imperial	Upper Devonian	EPMA
1319	1237-01	2006LHA1-4B	15	0.0623	0.139355	2.52762	2.20382	0.0770553	0.323804	length	eastern Eagle Plain, N. Yukon	Imperial	Upper Devonian	EPMA
1320	1237-01	2006LHA1-4B	16	0.0492	0.115745	2.64743	2.12693	0.0665448	0.520501	length	eastern Eagle Plain, N. Yukon	Imperial	Upper Devonian	EPMA
1321	1237-01	2006LHA1-4B	17	0.2483	0.184329	2.68737	2.35028	0.0639715	0.33709	length	eastern Eagle Plain, N. Yukon	Imperial	Upper Devonian	EPMA
1322	1237-01	2006LHA1-4B	18	0.332217	0.247245	2.37786	2.55517	0.0849724	0.177307	length	eastern Eagle Plain, N. Yukon	Imperial	Upper Devonian	ICPMS
1323	1237-01	2006LHA1-4B	19	0.0373	0.0502034	2.34791	1.91349	0.0129034	0.434421	length	eastern Eagle Plain, N. Yukon	Imperial	Upper Devonian	EPMA
1324	1237-01	2006LHA1-4B	20	0.1435	0.242997	2.59751	2.54134	0.0994967	0.0561764	length	eastern Eagle Plain, N. Yukon	Imperial	Upper Devonian	EPMA
1325	1237-01	2006LHA1-4B	21	0.0038	0.00598278	1.84871	1.76948	0.00218278	0.0792287	length	eastern Eagle Plain, N. Yukon	Imperial	Upper Devonian	EPMA
1326	1237-01	2006LHA1-4B	22	0.036	0.085967	2.34791	2.02996	0.049967	0.317954	length	eastern Eagle Plain, N. Yukon	Imperial	Upper Devonian	EPMA
1327	1237-01	2006LHA1-4B	23	0.1596	0.117139	2.37786	2.13147	0.0424606	0.246392	length	eastern Eagle Plain, N. Yukon	Imperial	Upper Devonian	EPMA
1328	1237-01	2006LHA1-4B	24	0	0.10729	2.21812	2.0994	0.10729	0.118721	length	eastern Eagle Plain, N. Yukon	Imperial	Upper Devonian	EPMA
1329	1237-01	2006LHA1-4B	25	0.018	0.0344451	1.92858	1.86217	0.0164451	0.0664113	length	eastern Eagle Plain, N. Yukon	Imperial	Upper Devonian	EPMA
1330	1237-01	2006LHA1-4B	26	0.1021	0.236905	2.68737	2.5215	0.134805	0.16587	length	eastern Eagle Plain, N. Yukon	Imperial	Upper Devonian	EPMA
1331	1237-01	2006LHA1-4B	27	0.0343	0.0896701	2.14823	2.04202	0.0553701	0.106215	length	eastern Eagle Plain, N. Yukon	Imperial	Upper Devonian	EPMA
1332	1237-01	2006LHA1-4B	28	0.0018	0.00598278	1.86868	1.76948	0.00418278	0.0991967	length	eastern Eagle Plain, N. Yukon	Imperial	Upper Devonian	EPMA
1333	1237-01	2006LHA1-4B	29	0.0208	0.0291669	2.12826	1.84498	0.00836694	0.28328	length	eastern Eagle Plain, N. Yukon	Imperial	Upper Devonian	EPMA
1334	1237-01	2006LHA1-4B	31	0.0068	0.0396651	2.02842	1.87917	0.0328651	0.149252	length	eastern Eagle Plain, N. Yukon	Imperial	Upper Devonian	EPMA
1335	1237-01	2006LHA1-4B	32	0.0036	0.00832364	2.3579	1.77711	0.00472364	0.580789	length	eastern Eagle Plain, N. Yukon	Imperial	Upper Devonian	EPMA
1336	1237-01	2006LHA1-4B	33	0.0177	0.209438	2.61748	2.43205	0.191738	0.185432	length	eastern Eagle Plain, N. Yukon	Imperial	Upper Devonian	EPMA
1337	1237-01	2006LHA1-4B	34	0.209717	0.205089	2.37786	2.41789	0.00462833	0.0400217	length	eastern Eagle Plain, N. Yukon	Imperial	Upper Devonian	ICPMS
1338	1237-01	2006LHA1-4B	35	0.148675	0.174765	2.38785	2.31913	0.0260897	0.0687144	length	eastern Eagle Plain, N. Yukon	Imperial	Upper Devonian	EPMA
1339	1237-01	2006LHA1-4B	36	0.0048	-0.00831014	2.1083	1.72294	0.0131101	0.385359	length	eastern Eagle Plain, N. Yukon	Imperial	Upper Devonian	EPMA
1340	1237-01	2006LHA1-4B	37	0.0151	0.00627602	2.55758	1.77044	0.00882398	0.787138	length	eastern Eagle Plain, N. Yukon	Imperial	Upper Devonian	EPMA
1341	1237-01	2006LHA1-4B	38	0.0829	0.170843	2.68737	2.30636	0.0879432	0.381005	length	eastern Eagle Plain, N. Yukon	Imperial	Upper Devonian	EPMA
1342	1237-01	2006LHA1-4B	39	0.0156	0.00686196	2.20814	1.77235	0.00873804	0.43579	length	eastern Eagle Plain, N. Yukon	Imperial	Upper Devonian	EPMA
1343	1237-01	2006LHA1-4B	40	0.0190903	-0.0187386	1.86868	1.68898	0.0378289	0.179704	length	eastern Eagle Plain, N. Yukon	Imperial	Upper Devonian	ICPMS
1344	1237-01	2006LHA1-4B	41	0.3017	0.296478	3.25646	2.7155	0.00522179	0.540954	length	eastern Eagle Plain, N. Yukon	Imperial	Upper Devonian	EPMA
1345	1237-01	2006LHA1-4B	42	0.0177	0.03665	2.01844	1.86935	0.01895	0.149087	length	eastern Eagle Plain, N. Yukon	Imperial	Upper Devonian	EPMA
1346	1237-01	2006LHA1-4B	43	0.0871	0.0854711	2.37786	2.02834	0.0016289	0.349522	length	eastern Eagle Plain, N. Yukon	Imperial	Upper Devonian	EPMA
1347	1237-01	2006LHA1-4B	44	0.0336	0.0837312	2.04839	2.02268	0.0501312	0.0257155	length	eastern Eagle Plain, N. Yukon	Imperial	Upper Devonian	EPMA
1348	1237-01	2006LHA1-4B	45	0.0043	0.0294462	1.99847	1.84589	0.0251462	0.152578	length	eastern Eagle Plain, N. Yukon	Imperial	Upper Devonian	EPMA
1349	1237-01	2006LHA1-4B	46	0.0046	0.0246762	1.98849	1.83036	0.0200762	0.158128	length	eastern Eagle Plain, N. Yukon	Imperial	Upper Devonian	EPMA
1350	1237-01	2006LHA1-4B	47	0.0633	0.145079	2.4178	2.22246	0.0817789	0.195341	length	eastern Eagle Plain, N. Yukon	Imperial	Upper Devonian	EPMA
1351	1237-01	2006LHA1-4B	48	0.0249	0.0164269	2.49767	1.8035	0.00847309	0.694177	length	eastern Eagle Plain, N. Yukon	Imperial	Upper Devonian	EPMA
1352	1237-01	2006LHA1-4B	49	0.0616	0.144203	2.81716	2.21961	0.0826028	0.597554	length	eastern Eagle Plain, N. Yukon	Imperial	Upper Devonian	EPMA
1353	1237-01	2006LHA1-4B	50	0.0927	0.088439	2.75726	2.03801	0.00426105	0.719248	length	eastern Eagle Plain, N. Yukon	Imperial	Upper Devonian	EPMA
1354	1237-01	2006LHA1-4B	51	0.068	0.158455	2.73729	2.26602	0.0904551	0.471268	length	eastern Eagle Plain, N. Yukon	Imperial	Upper Devonian	EPMA
1355	1237-01	2006LHA1-4B	52	0.0957	0.0597276	2.4178	1.94451	0.0359724	0.473293	length	eastern Eagle Plain, N. Yukon	Imperial	Upper Devonian	EPMA
1356	1148-02	KWJ09-04	1	0.1057	0.145298	2.28	2.22317	0.0395976	0.0568283	age	SE Eagle Plain	Burnthill Creek	Cenomanian	EPMA
1357	1148-02	KWJ09-04	2	0.1091	0.15739	2.11	2.26255	0.0482902	0.152552	age	SE Eagle Plain	Burnthill Creek	Cenomanian	EPMA
1358	1148-02	KWJ09-04	3	0.1046	0.136913	2.38	2.19587	0.0323129	0.184134	age	SE Eagle Plain	Burnthill Creek	Cenomanian	EPMA
1359	1148-02	KWJ09-04	4	0.1011	0.150734	2.22	2.24088	0.0496342	0.0208763	age	SE Eagle Plain	Burnthill Creek	Cenomanian	EPMA
1360	1148-02	KWJ09-04	5	0.1072	0.154181	2.36	2.2521	0.0469812	0.107898	age	SE Eagle Plain	Burnthill Creek	Cenomanian	EPMA
1361	1148-02	KWJ09-04	6	0.0961	0.15461	2.2	2.2535	0.0585103	0.0534992	age	SE Eagle Plain	Burnthill Creek	Cenomanian	EPMA
1362	1148-02	KWJ09-04	7	0.0953	0.14024	2.39	2.2067	0.0449404	0.183298	age	SE Eagle Plain	Burnthill Creek	Cenomanian	EPMA
1363	1148-02	KWJ09-04	8	0.096	0.140461	2.09	2.20742	0.0444614	0.117422	age	SE Eagle Plain	Burnthill Creek	Cenomanian	EPMA
1364	1148-02	KWJ09-04	9	0.1017	0.151382	2.13	2.24299	0.0496824	0.112987	age	SE Eagle Plain	Burnthill Creek	Cenomanian	EPMA
1365	1148-02	KWJ09-04	10	0.1059	0.141124	2.24	2.20958	0.0352238	0.0304208	age	SE Eagle Plain	Burnthill Creek	Cenomanian	EPMA
1366	1148-02	KWJ09-04	11	0.1077	0.156109	2.14	2.25838	0.0484092	0.11838	age	SE Eagle Plain	Burnthill Creek	Cenomanian	EPMA
1367	1148-02	KWJ09-04	12	0.1084	0.146608	2.17	2.22744	0.0382081	0.0574393	age	SE Eagle Plain	Burnthill Creek	Cenomanian	EPMA
1368	1148-02	KWJ09-04	13	0.0971	0.139355	2.65	2.20382	0.0422553	0.44618	age	SE Eagle Plain	Burnthill Creek	Cenomanian	EPMA
1369	1148-02	KWJ09-04	14	0.1006	0.163112	2.33	2.28119	0.0625123	0.0488136	age	SE Eagle Plain	Burnthill Creek	Cenomanian	EPMA
1370	1148-02	KWJ09-04	15	0.1085	0.130413	1.99	2.1747	0.0219128	0.184698	age	SE Eagle Plain	Burnthill Creek	Cenomanian	EPMA
1371	1148-02	KWJ09-04	16	0.1088	0.150085	2.25	2.23876	0.0412851	0.0112376	age	SE Eagle Plain	Burnthill Creek	Cenomanian	EPMA
1372	1148-02	KWJ09-04	17	0.1007	0.15203	2.06	2.2451	0.0513298	0.185095	age	SE Eagle Plain	Burnthill Creek	Cenomanian	EPMA
1373	1148-02	KWJ09-04	18	0.1035	0.167933	1.92	2.29688	0.0644328	0.376885	age	SE Eagle Plain	Burnthill Creek	Cenomanian	EPMA
1374	1148-02	KWJ09-04	19	0.1023	0.153107	2.31	2.2486	0.0508067	0.0613975	age	SE Eagle Plain	Burnthill Creek	Cenomanian	EPMA
1375	1148-02	KWJ09-04	20	0.0957	0.156323	2.52	2.25908	0.0606229	0.260924	age	SE Eagle Plain	Burnthill Creek	Cenomanian	EPMA
1376	1148-02	KWJ09-04	21	0.0995	0.147697	2.35	2.23099	0.0481974	0.119013	age	SE Eagle Plain	Burnthill Creek	Cenomanian	EPMA
1377	1148-02	KWJ09-04	22	0.1064	0.14835	2.23	2.23311	0.0419498	0.00311123	age	SE Eagle Plain	Burnthill Creek	Cenomanian	EPMA
1378	1148-02	KWJ09-04	23	0.1024	0.147697	2.45	2.23099	0.0452974	0.219013	age	SE Eagle Plain	Burnthill Creek	Cenomanian	EPMA
1379	1148-02	KWJ09-04	24	0.0937	0.162058	2.39	2.27775	0.0683578	0.112248	age	SE Eagle Plain	Burnthill Creek	Cenomanian	EPMA
1380	1148-02	KWJ09-04	25	0.1061	0.149652	2.1	2.23735	0.0435519	0.137352	age	SE Eagle Plain	Burnthill Creek	Cenomanian	EPMA
1381	1148-02	KWJ09-04	26	0.1021	0.155467	1.63	2.25629	0.0533674	0.62629	age	SE Eagle Plain	Burnthill Creek	Cenomanian	EPMA
1382	1148-02	KWJ09-04	27	0.0938	0.15888	2.32	2.2674	0.0650803	0.0525952	age	SE Eagle Plain	Burnthill Creek	Cenomanian	EPMA
1383	1148-02	KWJ09-04	28	0.1079	0.156323	2.27	2.25908	0.0484229	0.0109236	age	SE Eagle Plain	Burnthill Creek	Cenomanian	EPMA
1384	1148-02	KWJ09-04	29	0.1008	0.173324	2.22	2.31444	0.0725238	0.0944408	age	SE Eagle Plain	Burnthill Creek	Cenomanian	EPMA
1385	1148-02	KWJ09-04	30	0.1	0.147262	2.54	2.22957	0.047262	0.310431	age	SE Eagle Plain	Burnthill Creek	Cenomanian	EPMA
1386	1148-02	KWJ09-04	31	0.1063	0.146608	2.28	2.22744	0.0403081	0.0525607	age	SE Eagle Plain	Burnthill Creek	Cenomanian	EPMA
1387	1148-02	KWJ09-04	32	0.0994	0.162269	2.41	2.27844	0.0628689	0.13156	age	SE Eagle Plain	Burnthill Creek	Cenomanian	EPMA
1388	1148-02	KWJ09-04	33	0.1116	0.150734	2.42	2.24088	0.0391342	0.179124	age	SE Eagle Plain	Burnthill Creek	Cenomanian	EPMA
1389	1148-02	KWJ09-04	34	0.108	0.153107	2.47	2.2486	0.0451067	0.221397	age	SE Eagle Plain	Burnthill Creek	Cenomanian	EPMA
1390	1148-02	KWJ09-04	35	0.0996	0.158029	2.4	2.26463	0.0584294	0.135366	age	SE Eagle Plain	Burnthill Creek	Cenomanian	EPMA
1391	1148-02	KWJ09-04	36	0.1062	0.15973	2.53	2.27017	0.0535298	0.259829	age	SE Eagle Plain	Burnthill Creek	Cenomanian	EPMA
1392	1148-02	KWJ09-04	37	0.1003	0.143325	2.14	2.21675	0.0430251	0.076748	age	SE Eagle Plain	Burnthill Creek	Cenomanian	EPMA
1393	1148-02	KWJ09-04	38	0.1032	0.139355	2.24	2.20382	0.0361553	0.0361799	age	SE Eagle Plain	Burnthill Creek	Cenomanian	EPMA
1394	1148-02	KWJ09-04	39	0.0668	0.067521	2.36	1.96989	0.000721046	0.390113	age	SE Eagle Plain	Burnthill Creek	Cenomanian	EPMA
1395	1148-02	KWJ09-04	40	0.1024	0.132664	2.34	2.18203	0.0302643	0.15797	age	SE Eagle Plain	Burnthill Creek	Cenomanian	EPMA
1396	1148-02	KWJ09-04	1	0.1026	0.150302	2.67	2.23947	0.0477016	0.430533	length	SE Eagle Plain	Burnthill Creek	Cenomanian	EPMA
1397	1148-02	KWJ09-04	2	0.1043	0.173942	2.58	2.31645	0.0696419	0.263546	length	SE Eagle Plain	Burnthill Creek	Cenomanian	EPMA
1398	1148-02	KWJ09-04	3	0.115	0.154825	2.01	2.2542	0.0398247	0.244197	length	SE Eagle Plain	Burnthill Creek	Cenomanian	EPMA
1399	1148-02	KWJ09-04	4	0.1101	0.159942	2.71	2.27086	0.0498419	0.439138	length	SE Eagle Plain	Burnthill Creek	Cenomanian	EPMA
1400	1148-02	KWJ09-04	5	0.0992	0.118298	1.87	2.13525	0.0190984	0.265247	length	SE Eagle Plain	Burnthill Creek	Cenomanian	EPMA
1401	1148-02	KWJ09-04	6	0.112	0.150085	2.87	2.23876	0.0380851	0.631238	length	SE Eagle Plain	Burnthill Creek	Cenomanian	EPMA
1402	1148-02	KWJ09-04	7	0.111	0.142006	2.48	2.21245	0.0310055	0.267549	length	SE Eagle Plain	Burnthill Creek	Cenomanian	EPMA
1403	1148-02	KWJ09-04	8	0.1087	0.145079	2.51	2.22246	0.0363789	0.287541	length	SE Eagle Plain	Burnthill Creek	Cenomanian	EPMA
1404	1148-02	KWJ09-04	9	0.1017	0.135799	2.29	2.19224	0.0340985	0.0977628	length	SE Eagle Plain	Burnthill Creek	Cenomanian	EPMA
1405	1148-02	KWJ09-04	10	0.1028	0.119916	2.46	2.14052	0.0171162	0.319485	length	SE Eagle Plain	Burnthill Creek	Cenomanian	EPMA
1406	1148-02	KWJ09-04	11	0.0998	0.154396	2.31	2.2528	0.0545958	0.0571994	length	SE Eagle Plain	Burnthill Creek	Cenomanian	EPMA
1407	1148-02	KWJ09-04	12	0.1099	0.168141	2.6	2.29756	0.0582413	0.302436	length	SE Eagle Plain	Burnthill Creek	Cenomanian	EPMA
1408	1148-02	KWJ09-04	13	0.1045	0.172705	2.42	2.31243	0.0682049	0.107575	length	SE Eagle Plain	Burnthill Creek	Cenomanian	EPMA
1409	1148-02	KWJ09-04	14	0.1014	0.15888	2.42	2.2674	0.0574803	0.152595	length	SE Eagle Plain	Burnthill Creek	Cenomanian	EPMA
1410	1148-02	KWJ09-04	15	0.107	0.119685	2.21	2.13976	0.0126855	0.0702361	length	SE Eagle Plain	Burnthill Creek	Cenomanian	EPMA
1411	1148-02	KWJ09-04	16	0.1061	0.16668	2.47	2.2928	0.06058	0.177195	length	SE Eagle Plain	Burnthill Creek	Cenomanian	EPMA
1412	1148-02	KWJ09-04	17	0.0922	0.147262	2.48	2.22957	0.055062	0.250431	length	SE Eagle Plain	Burnthill Creek	Cenomanian	EPMA
1413	1148-02	KWJ09-04	18	0.1007	0.147915	2.44	2.2317	0.0472149	0.208305	length	SE Eagle Plain	Burnthill Creek	Cenomanian	EPMA
1414	1148-02	KWJ09-04	19	0.1013	0.141565	2.24	2.21102	0.0402648	0.0289844	length	SE Eagle Plain	Burnthill Creek	Cenomanian	EPMA
1415	1148-02	KWJ09-04	20	0.0996	0.151382	2.42	2.24299	0.0517824	0.177013	length	SE Eagle Plain	Burnthill Creek	Cenomanian	EPMA
1416	1148-02	KWJ09-04	21	0.1023	0.122906	2.56	2.15025	0.0206063	0.409747	length	SE Eagle Plain	Burnthill Creek	Cenomanian	EPMA
1417	1148-02	KWJ09-04	22	0.111	0.150734	2.63	2.24088	0.0397342	0.389124	length	SE Eagle Plain	Burnthill Creek	Cenomanian	EPMA
1418	1148-02	KWJ09-04	23	0.1097	0.158668	2.29	2.26671	0.0489678	0.0232876	length	SE Eagle Plain	Burnthill Creek	Cenomanian	EPMA
1419	1148-02	KWJ09-04	24	0.0997	0.164585	2.46	2.28598	0.0648846	0.174019	length	SE Eagle Plain	Burnthill Creek	Cenomanian	EPMA
1420	1148-02	KWJ09-04	25	0.1062	0.164795	2.2	2.28666	0.0585945	0.0866648	length	SE Eagle Plain	Burnthill Creek	Cenomanian	EPMA
1421	1148-02	KWJ09-04	26	0.1055	0.173942	2.6	2.31645	0.0684419	0.283546	length	SE Eagle Plain	Burnthill Creek	Cenomanian	EPMA
1422	1148-02	KWJ09-04	27	0.1	0.147262	2.65	2.22957	0.047262	0.420431	length	SE Eagle Plain	Burnthill Creek	Cenomanian	EPMA
1423	1148-02	KWJ09-04	28	0.1071	0.158242	2.31	2.26533	0.0511423	0.0446731	length	SE Eagle Plain	Burnthill Creek	Cenomanian	EPMA
1424	1148-02	KWJ09-04	29	0.1106	0.140682	2.1	2.20814	0.0300823	0.108141	length	SE Eagle Plain	Burnthill Creek	Cenomanian	EPMA
1425	1148-02	KWJ09-04	30	0.1308	0.149435	3.15	2.23665	0.0186351	0.913354	length	SE Eagle Plain	Burnthill Creek	Cenomanian	EPMA
1426	1148-02	KWJ09-04	31	0.1015	0.146608	2.52	2.22744	0.0451081	0.292561	length	SE Eagle Plain	Burnthill Creek	Cenomanian	EPMA
1427	1148-02	KWJ09-04	32	0.1039	0.163112	2.34	2.28119	0.0592123	0.0588136	length	SE Eagle Plain	Burnthill Creek	Cenomanian	EPMA
1428	1148-02	KWJ09-04	33	0.114	0.14639	2.81	2.22673	0.0323899	0.583271	length	SE Eagle Plain	Burnthill Creek	Cenomanian	EPMA
1429	1148-02	KWJ09-04	34	0.09	0.148784	2.3	2.23453	0.0587842	0.065474	length	SE Eagle Plain	Burnthill Creek	Cenomanian	EPMA
1430	1148-02	KWJ09-04	35	0.1007	0.15675	2.55	2.26047	0.0560501	0.289532	length	SE Eagle Plain	Burnthill Creek	Cenomanian	EPMA
1431	1148-02	KWJ09-04	36	0.1135	0.163744	2.65	2.28324	0.0502438	0.366757	length	SE Eagle Plain	Burnthill Creek	Cenomanian	EPMA
1432	1148-02	KWJ09-04	37	0.1005	0.146172	2.37	2.22602	0.0456717	0.143982	length	SE Eagle Plain	Burnthill Creek	Cenomanian	EPMA
1433	1148-02	KWJ09-04	38	0.1037	0.167307	2.52	2.29485	0.0636068	0.225154	length	SE Eagle Plain	Burnthill Creek	Cenomanian	EPMA
1434	1148-02	KWJ09-04	39	0	-0.06372	2.57	1.54249	0.06372	1.02751	length	SE Eagle Plain	Burnthill Creek	Cenomanian	EPMA
1435	1148-02	KWJ09-04	40	0.0988	0.151598	2.56	2.24369	0.0527983	0.31631	length	SE Eagle Plain	Burnthill Creek	Cenomanian	EPMA
1436	1148-02	KWJ09-04	41	0.1062	0.149218	2.84	2.23594	0.0430182	0.604061	length	SE Eagle Plain	Burnthill Creek	Cenomanian	EPMA
1437	1148-02	KWJ09-04	42	0.0989	0.146608	2.76	2.22744	0.0477081	0.532561	length	SE Eagle Plain	Burnthill Creek	Cenomanian	EPMA
1438	1148-02	KWJ09-04	43	0.0981	0.153322	2.55	2.2493	0.0552218	0.300697	length	SE Eagle Plain	Burnthill Creek	Cenomanian	EPMA
1439	1148-02	KWJ09-04	44	0.1063	0.132889	2.54	2.18276	0.0265888	0.357238	length	SE Eagle Plain	Burnthill Creek	Cenomanian	EPMA
1440	1148-02	KWJ09-04	45	0.1006	0.155681	2.58	2.25699	0.0550814	0.323013	length	SE Eagle Plain	Burnthill Creek	Cenomanian	EPMA
1441	1148-03	KWJ09-06	1	0.0657	0.111536	2.40782	2.11323	0.0458365	0.29459	age	SE Eagle Plain	Cody Creek	Cenomanian - Turonian?	EPMA
1442	1148-03	KWJ09-06	2	0.4224	0.347262	3.14663	2.88088	0.0751381	0.26575	age	SE Eagle Plain	Cody Creek	Cenomanian - Turonian?	EPMA
1443	1148-03	KWJ09-06	3	0.1361	0.156323	2.38785	2.25908	0.0202229	0.128772	age	SE Eagle Plain	Cody Creek	Cenomanian - Turonian?	EPMA
1444	1148-03	KWJ09-06	4	0.1131	0.194887	2.42778	2.38466	0.0817869	0.0431215	age	SE Eagle Plain	Cody Creek	Cenomanian - Turonian?	EPMA
1445	1148-03	KWJ09-06	5	0.0376	0.115512	2.18817	2.12617	0.077912	0.0619951	age	SE Eagle Plain	Cody Creek	Cenomanian - Turonian?	EPMA
1446	1148-03	KWJ09-06	6	0.0143	0.03665	2.29799	1.86935	0.02235	0.428639	age	SE Eagle Plain	Cody Creek	Cenomanian - Turonian?	EPMA
1447	1148-03	KWJ09-06	7	0.0596	0.118067	2.23809	2.13449	0.0584668	0.103595	age	SE Eagle Plain	Cody Creek	Cenomanian - Turonian?	EPMA
1448	1148-03	KWJ09-06	8	0.058	0.139798	2.46772	2.20526	0.081798	0.262458	age	SE Eagle Plain	Cody Creek	Cenomanian - Turonian?	EPMA
1449	1148-03	KWJ09-06	9	0.2624	0.238525	3.06676	2.52677	0.0238748	0.539986	age	SE Eagle Plain	Cody Creek	Cenomanian - Turonian?	EPMA
1450	1148-03	KWJ09-06	10	0.1895	0.220019	3.27642	2.46651	0.0305185	0.809919	age	SE Eagle Plain	Cody Creek	Cenomanian - Turonian?	EPMA
1451	1148-03	KWJ09-06	11	0.0819	0.155467	2.76724	2.25629	0.0735674	0.51095	age	SE Eagle Plain	Cody Creek	Cenomanian - Turonian?	EPMA
1452	1148-03	KWJ09-06	12	0.0114	-0.023671	1.74887	1.67291	0.035071	0.0759582	age	SE Eagle Plain	Cody Creek	Cenomanian - Turonian?	EPMA
1453	1148-03	KWJ09-06	13	0.0571	0.172085	2.42778	2.31041	0.114985	0.117377	age	SE Eagle Plain	Cody Creek	Cenomanian - Turonian?	EPMA
1454	1148-03	KWJ09-06	14	0.0171	0.00156231	1.80878	1.75509	0.0155377	0.0536882	age	SE Eagle Plain	Cody Creek	Cenomanian - Turonian?	EPMA
1455	1148-03	KWJ09-06	15	0.0113	-0.00140772	1.71892	1.74542	0.0127077	0.0264957	age	SE Eagle Plain	Cody Creek	Cenomanian - Turonian?	EPMA
1456	1148-03	KWJ09-06	16	0	-0.00260095	2.17818	1.74153	0.00260095	0.436654	age	SE Eagle Plain	Cody Creek	Cenomanian - Turonian?	EPMA
1457	1148-03	KWJ09-06	17	0.0559	0.152892	2.2281	2.2479	0.0969915	0.0197977	age	SE Eagle Plain	Cody Creek	Cenomanian - Turonian?	EPMA
1458	1148-03	KWJ09-06	18	0.0054	0.0607742	2.61748	1.94792	0.0553742	0.669565	age	SE Eagle Plain	Cody Creek	Cenomanian - Turonian?	EPMA
1459	1148-03	KWJ09-06	19	0.0895	0.128377	2.12826	2.16807	0.0388773	0.0398056	age	SE Eagle Plain	Cody Creek	Cenomanian - Turonian?	EPMA
1460	1148-03	KWJ09-06	20	0.0022	-0.0119517	1.70894	1.71108	0.0141517	0.0021426	age	SE Eagle Plain	Cody Creek	Cenomanian - Turonian?	EPMA
1461	1148-03	KWJ09-06	21	0.052	0.129057	2.21812	2.17028	0.0770568	0.0478377	age	SE Eagle Plain	Cody Creek	Cenomanian - Turonian?	EPMA
1462	1148-03	KWJ09-06	22	0.0483	0.120377	2.30798	2.14202	0.0720775	0.165958	age	SE Eagle Plain	Cody Creek	Cenomanian - Turonian?	EPMA
1463	1148-03	KWJ09-06	23	0.0034	-0.00559723	2.25806	1.73177	0.00899723	0.526284	age	SE Eagle Plain	Cody Creek	Cenomanian - Turonian?	EPMA
1464	1148-03	KWJ09-06	24	0.0393	0.067521	2.17818	1.96989	0.028221	0.208297	age	SE Eagle Plain	Cody Creek	Cenomanian - Turonian?	EPMA
1465	1148-03	KWJ09-06	25	0.065	0.0512711	2.31796	1.91697	0.0137289	0.400992	age	SE Eagle Plain	Cody Creek	Cenomanian - Turonian?	EPMA
1466	1148-03	KWJ09-06	26	0.1242	0.176201	2.30798	2.32381	0.0520015	0.0158362	age	SE Eagle Plain	Cody Creek	Cenomanian - Turonian?	EPMA
1467	1148-03	KWJ09-06	28	0.1969	0.259958	2.56756	2.59657	0.0630582	0.0290118	age	SE Eagle Plain	Cody Creek	Cenomanian - Turonian?	EPMA
1468	1148-03	KWJ09-06	29	0.1041	0.158455	2.54759	2.26602	0.0543551	0.281572	age	SE Eagle Plain	Cody Creek	Cenomanian - Turonian?	EPMA
1469	1148-03	KWJ09-06	30	0.2326	0.2765	1.68897	2.65044	0.0439003	0.961474	age	SE Eagle Plain	Cody Creek	Cenomanian - Turonian?	EPMA
1470	1148-03	KWJ09-06	31	0	-0.0499914	1.69	1.5872	0.0499914	0.1028	age	SE Eagle Plain	Cody Creek	Cenomanian - Turonian?	EPMA
1471	1148-03	KWJ09-06	32	0.0713	0.138912	2.26804	2.20238	0.0676122	0.065663	age	SE Eagle Plain	Cody Creek	Cenomanian - Turonian?	EPMA
1472	1148-03	KWJ09-06	33	0.0011	0.0232641	2.74727	1.82576	0.0221641	0.921511	age	SE Eagle Plain	Cody Creek	Cenomanian - Turonian?	EPMA
1473	1148-03	KWJ09-06	34	0.0681	0.166471	2.18817	2.29212	0.0983709	0.103956	age	SE Eagle Plain	Cody Creek	Cenomanian - Turonian?	EPMA
1474	1148-03	KWJ09-06	35	0.045	0.159942	2.32794	2.27086	0.114942	0.0570823	age	SE Eagle Plain	Cody Creek	Cenomanian - Turonian?	EPMA
1475	1148-03	KWJ09-06	36	0.0861	0.163954	2.8571	2.28393	0.0778542	0.573168	age	SE Eagle Plain	Cody Creek	Cenomanian - Turonian?	EPMA
1476	1148-03	KWJ09-06	37	0.0554	0.11224	2.33793	2.11552	0.0568405	0.222409	age	SE Eagle Plain	Cody Creek	Cenomanian - Turonian?	EPMA
1477	1148-03	KWJ09-06	38	0.0339	0.014414	1.82874	1.79694	0.019486	0.0318037	age	SE Eagle Plain	Cody Creek	Cenomanian - Turonian?	EPMA
1478	1148-03	KWJ09-06	39	0.0748	0.157603	2.56756	2.26325	0.0828034	0.304314	age	SE Eagle Plain	Cody Creek	Cenomanian - Turonian?	EPMA
1479	1148-03	KWJ09-06	40	0.0838	0.225407	2.73729	2.48405	0.141607	0.253236	age	SE Eagle Plain	Cody Creek	Cenomanian - Turonian?	EPMA
1480	1148-03	KWJ09-06	1	0.0629	0.115745	1.79879	2.12693	0.0528448	0.328139	length	SE Eagle Plain	Cody Creek	Cenomanian - Turonian?	EPMA
1481	1148-03	KWJ09-06	2	0.1311	0.0764545	2.48769	1.99898	0.0546455	0.488709	length	SE Eagle Plain	Cody Creek	Cenomanian - Turonian?	EPMA
1482	1148-03	KWJ09-06	3	0.2465	0.299333	3.18657	2.7248	0.0528325	0.461771	length	SE Eagle Plain	Cody Creek	Cenomanian - Turonian?	EPMA
1483	1148-03	KWJ09-06	4	0.1272	0.148784	3.02682	2.23453	0.0215842	0.792298	length	SE Eagle Plain	Cody Creek	Cenomanian - Turonian?	EPMA
1484	1148-03	KWJ09-06	5	0.0862	0.211535	2.8571	2.43888	0.125335	0.418219	length	SE Eagle Plain	Cody Creek	Cenomanian - Turonian?	EPMA
1485	1148-03	KWJ09-06	6	0.1047	0.139134	2.25806	2.2031	0.0344338	0.0549573	length	SE Eagle Plain	Cody Creek	Cenomanian - Turonian?	EPMA
1486	1148-03	KWJ09-06	7	0.0035	-0.0463747	2.01844	1.59898	0.0498747	0.419462	length	SE Eagle Plain	Cody Creek	Cenomanian - Turonian?	EPMA
1487	1148-03	KWJ09-06	8	0.056	0.101089	3.03681	2.0792	0.0450894	0.957603	length	SE Eagle Plain	Cody Creek	Cenomanian - Turonian?	EPMA
1488	1148-03	KWJ09-06	9	0.0584	0.171878	2.84711	2.30973	0.113478	0.537378	length	SE Eagle Plain	Cody Creek	Cenomanian - Turonian?	EPMA
1489	1148-03	KWJ09-06	10	0.1057	0.239423	3.90542	2.5297	0.133723	1.37572	length	SE Eagle Plain	Cody Creek	Cenomanian - Turonian?	EPMA
1490	1148-03	KWJ09-06	11	0.16	0.104677	2.53761	2.09089	0.0553232	0.446721	length	SE Eagle Plain	Cody Creek	Cenomanian - Turonian?	EPMA
1491	1148-03	KWJ09-06	12	0.0493	0.0931004	2.1682	2.05319	0.0438004	0.115012	length	SE Eagle Plain	Cody Creek	Cenomanian - Turonian?	EPMA
1492	1148-03	KWJ09-06	13	0.0043	-0.0702192	1.88865	1.52133	0.0745192	0.367322	length	SE Eagle Plain	Cody Creek	Cenomanian - Turonian?	EPMA
1493	1148-03	KWJ09-06	14	0.1502	0.195281	3.75566	2.38595	0.0450807	1.36971	length	SE Eagle Plain	Cody Creek	Cenomanian - Turonian?	EPMA
1494	1148-03	KWJ09-06	15	0.0201	0.014414	2.00846	1.79694	0.00568597	0.211516	length	SE Eagle Plain	Cody Creek	Cenomanian - Turonian?	EPMA
1495	1148-03	KWJ09-06	16	0.0178	0.01499	2.14823	1.79882	0.00280999	0.349416	length	SE Eagle Plain	Cody Creek	Cenomanian - Turonian?	EPMA
1496	1148-03	KWJ09-06	17	0.054	0.116907	2.1682	2.13072	0.0629073	0.0374835	length	SE Eagle Plain	Cody Creek	Cenomanian - Turonian?	EPMA
1497	1148-03	KWJ09-06	18	0.0056	0.0091985	1.78881	1.77996	0.0035985	0.00885246	length	SE Eagle Plain	Cody Creek	Cenomanian - Turonian?	EPMA
1498	1148-03	KWJ09-06	19	0.0805	0.173942	2.6075	2.31645	0.0934419	0.291042	length	SE Eagle Plain	Cody Creek	Cenomanian - Turonian?	EPMA
1499	1148-03	KWJ09-06	20	0.0072	0.07696	1.87866	2.00063	0.06976	0.121961	length	SE Eagle Plain	Cody Creek	Cenomanian - Turonian?	EPMA
1500	1148-03	KWJ09-06	21	0.0551	0.136913	2.63745	2.19587	0.0818129	0.441582	length	SE Eagle Plain	Cody Creek	Cenomanian - Turonian?	EPMA
1501	1148-03	KWJ09-06	22	0	0.0283282	2.51764	1.84225	0.0283282	0.675387	length	SE Eagle Plain	Cody Creek	Cenomanian - Turonian?	EPMA
1502	1148-03	KWJ09-06	23	0.0638	0.151598	2.62746	2.24369	0.0877983	0.383774	length	SE Eagle Plain	Cody Creek	Cenomanian - Turonian?	EPMA
1503	1148-03	KWJ09-06	24	0.1101	0.157177	2.43777	2.26186	0.0470769	0.17591	length	SE Eagle Plain	Cody Creek	Cenomanian - Turonian?	EPMA
1504	1148-03	KWJ09-06	25	0.0824	0.136245	2.43777	2.19369	0.0538446	0.244078	length	SE Eagle Plain	Cody Creek	Cenomanian - Turonian?	EPMA
1505	1148-03	KWJ09-06	26	0.0031	-0.00529675	2.14823	1.73275	0.00839675	0.415481	length	SE Eagle Plain	Cody Creek	Cenomanian - Turonian?	EPMA
1506	1148-03	KWJ09-06	27	0.0152	0.000969787	2.28801	1.75316	0.0142302	0.53485	length	SE Eagle Plain	Cody Creek	Cenomanian - Turonian?	EPMA
1507	1148-03	KWJ09-06	28	0.0146	-0.00770593	2.13825	1.72491	0.0223059	0.413343	length	SE Eagle Plain	Cody Creek	Cenomanian - Turonian?	EPMA
1508	1148-03	KWJ09-06	29	0.0064	0.0690645	3.38625	1.97491	0.0626645	1.41133	length	SE Eagle Plain	Cody Creek	Cenomanian - Turonian?	EPMA
1509	1148-03	KWJ09-06	30	0.1061	0.159093	2.62746	2.2681	0.0529928	0.359367	length	SE Eagle Plain	Cody Creek	Cenomanian - Turonian?	EPMA
1510	1148-03	KWJ09-06	31	0.0423	0.0636403	1.93857	1.95725	0.0213403	0.0186811	length	SE Eagle Plain	Cody Creek	Cenomanian - Turonian?	EPMA
1511	1148-03	KWJ09-06	32	0.0556	0.124509	2.68737	2.15547	0.0689085	0.531897	length	SE Eagle Plain	Cody Creek	Cenomanian - Turonian?	EPMA
1512	1148-03	KWJ09-06	33	0.0496	0.0432039	2.17818	1.8907	0.00639606	0.287487	length	SE Eagle Plain	Cody Creek	Cenomanian - Turonian?	EPMA
1513	1148-03	KWJ09-06	34	0.0775	0.0212801	2.07834	1.8193	0.0562199	0.259044	length	SE Eagle Plain	Cody Creek	Cenomanian - Turonian?	EPMA
1514	1148-03	KWJ09-06	35	0.0454	0.113411	1.9785	2.11933	0.0680115	0.140828	length	SE Eagle Plain	Cody Creek	Cenomanian - Turonian?	EPMA
1515	1148-03	KWJ09-06	36	0.1691	0.232557	2.87706	2.50734	0.0634575	0.369725	length	SE Eagle Plain	Cody Creek	Cenomanian - Turonian?	EPMA
1516	1148-03	KWJ09-06	37	0.0512	0.0981999	2.20814	2.06979	0.0469999	0.138341	length	SE Eagle Plain	Cody Creek	Cenomanian - Turonian?	EPMA
1517	1148-03	KWJ09-06	38	0.0015	0.0291669	2.71732	1.84498	0.0276669	0.872336	length	SE Eagle Plain	Cody Creek	Cenomanian - Turonian?	EPMA
1518	1148-03	KWJ09-06	39	0.1111	0.178042	3.17658	2.32981	0.0669422	0.846777	length	SE Eagle Plain	Cody Creek	Cenomanian - Turonian?	EPMA
1519	1148-03	KWJ09-06	40	0.0178	0.0477922	2.1682	1.90564	0.0299922	0.262562	length	SE Eagle Plain	Cody Creek	Cenomanian - Turonian?	EPMA
1520	1148-03	KWJ09-06	42	0.0457	0.153537	2.18817	2.25	0.107837	0.0618351	length	SE Eagle Plain	Cody Creek	Cenomanian - Turonian?	EPMA
1521	1148-03	KWJ09-06	43	0.0554	0.163954	2.70734	2.28393	0.108554	0.423408	length	SE Eagle Plain	Cody Creek	Cenomanian - Turonian?	EPMA
1522	1148-03	KWJ09-06	44	0.1157	0.151382	2.46772	2.24299	0.0356824	0.224733	length	SE Eagle Plain	Cody Creek	Cenomanian - Turonian?	EPMA
1523	1148-03	KWJ09-06	45	0.0629	0.134905	2.45774	2.18933	0.0720051	0.268408	length	SE Eagle Plain	Cody Creek	Cenomanian - Turonian?	EPMA
1524	1148-03	KWJ09-06	46	0.2445	0.209629	3.03681	2.43267	0.0348713	0.604138	length	SE Eagle Plain	Cody Creek	Cenomanian - Turonian?	EPMA
1525	1148-03	KWJ09-06	47	0	-0.0782077	1.92858	1.49531	0.0782077	0.433273	length	SE Eagle Plain	Cody Creek	Cenomanian - Turonian?	EPMA
1526	1148-03	KWJ09-06	48	0.0401	0.138247	2.07834	2.20021	0.0981467	0.121866	length	SE Eagle Plain	Cody Creek	Cenomanian - Turonian?	EPMA
1527	1148-03	KWJ09-06	49	0.4245	0.325924	2.57754	2.81139	0.0985757	0.233851	length	SE Eagle Plain	Cody Creek	Cenomanian - Turonian?	EPMA
1528	1148-03	KWJ09-06	50	0.008	-0.0277476	2.08833	1.65964	0.0357476	0.42869	length	SE Eagle Plain	Cody Creek	Cenomanian - Turonian?	EPMA
1529	1148-03	KWJ09-06	51	0.0939	0.141344	1.79879	2.2103	0.0474444	0.411506	length	SE Eagle Plain	Cody Creek	Cenomanian - Turonian?	EPMA
1530	1148-03	KWJ09-06	52	0.0058	-0.0171588	1.79879	1.69412	0.0229588	0.104671	length	SE Eagle Plain	Cody Creek	Cenomanian - Turonian?	EPMA
1531	1148-03	KWJ09-06	53	0.1121	0.153322	2.79719	2.2493	0.0412218	0.547889	length	SE Eagle Plain	Cody Creek	Cenomanian - Turonian?	EPMA
1532	1148-03	KWJ09-06	54	0.0027	-0.0280626	1.9186	1.65861	0.0307626	0.259988	length	SE Eagle Plain	Cody Creek	Cenomanian - Turonian?	EPMA
1533	1148-03	KWJ09-06	55	0.1103	0.206563	2.58753	2.42269	0.0962629	0.164842	length	SE Eagle Plain	Cody Creek	Cenomanian - Turonian?	EPMA
1534	1148-03	KWJ09-06	56	0.0336	0.118298	2.4178	2.13525	0.0846984	0.282553	length	SE Eagle Plain	Cody Creek	Cenomanian - Turonian?	EPMA
1535	1148-03	KWJ09-06	57	0.0634	0.190334	2.78721	2.36983	0.126934	0.417373	length	SE Eagle Plain	Cody Creek	Cenomanian - Turonian?	EPMA
1536	1148-03	KWJ09-06	59	0.0594	0.141344	3.09671	2.2103	0.0819444	0.886414	length	SE Eagle Plain	Cody Creek	Cenomanian - Turonian?	EPMA
1537	1148-03	KWJ09-06	60	0.1006	0.167933	2.94695	2.29688	0.0673328	0.650067	length	SE Eagle Plain	Cody Creek	Cenomanian - Turonian?	EPMA
1538	1148-03	KWJ09-06	61	0.0616	0.175176	2.77722	2.32047	0.113576	0.456752	length	SE Eagle Plain	Cody Creek	Cenomanian - Turonian?	EPMA
1539	1148-03	KWJ09-06	62	0.4312	0.354636	3.4162	2.9049	0.0765643	0.511304	length	SE Eagle Plain	Cody Creek	Cenomanian - Turonian?	EPMA
1540	1148-03	KWJ09-06	63	0.0607	0.139577	2.61748	2.20454	0.0788767	0.412939	length	SE Eagle Plain	Cody Creek	Cenomanian - Turonian?	EPMA
1541	1148-03	KWJ09-06	64	0.0169	0.0906527	2.58753	2.04522	0.0737527	0.542311	length	SE Eagle Plain	Cody Creek	Cenomanian - Turonian?	EPMA
1542	1148-03	KWJ09-06	65	0.0017	-0.029009	1.93857	1.65553	0.030709	0.283038	length	SE Eagle Plain	Cody Creek	Cenomanian - Turonian?	EPMA
1543	1148-03	KWJ09-06	66	0.1935	0.245837	2.86708	2.55058	0.0523366	0.316496	length	SE Eagle Plain	Cody Creek	Cenomanian - Turonian?	EPMA
1544	1148-03	KWJ09-06	67	0.3282	0.273839	2.67738	2.64177	0.0543614	0.0356097	length	SE Eagle Plain	Cody Creek	Cenomanian - Turonian?	EPMA
1545	1148-03	KWJ09-06	68	0.0017	-0.0509826	2.06836	1.58397	0.0526826	0.484388	length	SE Eagle Plain	Cody Creek	Cenomanian - Turonian?	EPMA
1546	1148-03	KWJ09-06	69	0.0037	-0.0309074	2.00846	1.64935	0.0346074	0.359108	length	SE Eagle Plain	Cody Creek	Cenomanian - Turonian?	EPMA
1547	1148-03	KWJ09-06	70	0.0833	0.215135	3.53601	2.4506	0.131835	1.08541	length	SE Eagle Plain	Cody Creek	Cenomanian - Turonian?	EPMA
1548	1148-03	KWJ09-06	71	0.0493	0.0984414	2.74727	2.07058	0.0491414	0.676691	length	SE Eagle Plain	Cody Creek	Cenomanian - Turonian?	EPMA
1549	1148-03	KWJ09-06	72	0.0822	0.191922	2.93697	2.37501	0.109722	0.561959	length	SE Eagle Plain	Cody Creek	Cenomanian - Turonian?	EPMA
1550	1148-03	KWJ09-06	73	0.0892	0.207907	3.06676	2.42706	0.118707	0.639698	length	SE Eagle Plain	Cody Creek	Cenomanian - Turonian?	EPMA
1551	P013-01	W. Chance H-28	6	0.0198	0.0418929	1.57914	1.88643	0.0220929	0.307283	age	S. Eagle Plain	Burnthill/Cody Creek	Upper Cretaceous	EPMA
1552	P013-01	W. Chance H-28	7	0.0047	-0.023504	2.17818	1.67346	0.028204	0.504726	age	S. Eagle Plain	Burnthill/Cody Creek	Upper Cretaceous	EPMA
1553	P013-01	W. Chance H-28	9	0.0018	-0.0765691	2.4178	1.50065	0.0783691	0.917152	age	S. Eagle Plain	Burnthill/Cody Creek	Upper Cretaceous	EPMA
1554	P013-01	W. Chance H-28	12	0.0023	-0.0774715	1.75886	1.49771	0.0797715	0.261147	age	S. Eagle Plain	Burnthill/Cody Creek	Upper Cretaceous	EPMA
1555	P013-01	W. Chance H-28	14	0.002	-0.0211641	1.74887	1.68108	0.0231641	0.0677942	age	S. Eagle Plain	Burnthill/Cody Creek	Upper Cretaceous	EPMA
1556	P013-01	W. Chance H-28	15	0.0086	-0.0252337	2.39783	1.66782	0.0338337	0.730007	age	S. Eagle Plain	Burnthill/Cody Creek	Upper Cretaceous	EPMA
1557	P013-01	W. Chance H-28	16	0.0221	-0.0107165	1.89863	1.7151	0.0328165	0.183531	age	S. Eagle Plain	Burnthill/Cody Creek	Upper Cretaceous	EPMA
1558	P013-01	W. Chance H-28	17	0.0984	0.152024	1.8587	2.24508	0.0536241	0.386381	age	S. Eagle Plain	Burnthill/Cody Creek	Upper Cretaceous	EPMA
1559	P013-01	W. Chance H-28	18	0.0329	0.0343173	2.1083	1.86176	0.00141729	0.246539	age	S. Eagle Plain	Burnthill/Cody Creek	Upper Cretaceous	EPMA
1560	P013-01	W. Chance H-28	20	0.0031	0.0742671	2.04839	1.99186	0.0711671	0.0565361	age	S. Eagle Plain	Burnthill/Cody Creek	Upper Cretaceous	EPMA
1561	P013-01	W. Chance H-28	21	0.0017	-0.0600357	1.61908	1.55449	0.0617357	0.0645902	age	S. Eagle Plain	Burnthill/Cody Creek	Upper Cretaceous	EPMA
1562	P013-01	W. Chance H-28	23	0.0511	0.154568	1.79879	2.25336	0.103468	0.454571	age	S. Eagle Plain	Burnthill/Cody Creek	Upper Cretaceous	EPMA
1563	P013-01	W. Chance H-28	24	0.0026	-0.071264	2.02842	1.51792	0.073864	0.5105	age	S. Eagle Plain	Burnthill/Cody Creek	Upper Cretaceous	EPMA
1564	P013-01	W. Chance H-28	25	0.0048	-0.0647359	2.03841	1.53918	0.0695359	0.499225	age	S. Eagle Plain	Burnthill/Cody Creek	Upper Cretaceous	EPMA
1565	P013-01	W. Chance H-28	27	0.1534	0.137721	2.01844	2.1985	0.0156788	0.180059	age	S. Eagle Plain	Burnthill/Cody Creek	Upper Cretaceous	EPMA
1566	P013-01	W. Chance H-28	28	0.0083	-0.0326075	1.83873	1.64381	0.0409075	0.194917	age	S. Eagle Plain	Burnthill/Cody Creek	Upper Cretaceous	EPMA
1567	P013-01	W. Chance H-28	29	0.0052	-0.0398143	2.07834	1.62034	0.0450143	0.458002	age	S. Eagle Plain	Burnthill/Cody Creek	Upper Cretaceous	EPMA
1568	P013-01	W. Chance H-28	31	0.0771	0.172606	2.13825	2.3121	0.0955064	0.173857	age	S. Eagle Plain	Burnthill/Cody Creek	Upper Cretaceous	EPMA
1569	P013-01	W. Chance H-28	32	0.0934	0.148613	2.2281	2.23397	0.0552125	0.00586294	age	S. Eagle Plain	Burnthill/Cody Creek	Upper Cretaceous	EPMA
1570	P013-01	W. Chance H-28	33	0.1239	0.179344	1.63905	2.33405	0.0554439	0.694998	age	S. Eagle Plain	Burnthill/Cody Creek	Upper Cretaceous	EPMA
1571	P013-01	W. Chance H-28	34	0.0085	-0.0455951	1.95854	1.60152	0.0540951	0.35702	age	S. Eagle Plain	Burnthill/Cody Creek	Upper Cretaceous	EPMA
1572	P013-01	W. Chance H-28	35	0.0221	-0.00545897	1.80878	1.73222	0.027559	0.0765535	age	S. Eagle Plain	Burnthill/Cody Creek	Upper Cretaceous	EPMA
1573	P013-01	W. Chance H-28	1	0.0088	0.111503	2.05838	2.11312	0.102703	0.0547422	age	S. Eagle Plain	Burnthill/Cody Creek	Upper Cretaceous	EPMA
1574	P013-01	W. Chance H-28	2	0.0212	0.110318	1.67898	2.10926	0.0891182	0.430275	age	S. Eagle Plain	Burnthill/Cody Creek	Upper Cretaceous	EPMA
1575	P013-01	W. Chance H-28	3	0.2121	0.316941	2.81716	2.78214	0.104841	0.0350194	age	S. Eagle Plain	Burnthill/Cody Creek	Upper Cretaceous	EPMA
1576	P013-01	W. Chance H-28	4	0.086	0.213552	1.70894	2.44545	0.127552	0.736512	age	S. Eagle Plain	Burnthill/Cody Creek	Upper Cretaceous	EPMA
1577	P013-01	W. Chance H-28	6	0.0072	-0.0411879	2.19815	1.61587	0.0483879	0.582283	age	S. Eagle Plain	Burnthill/Cody Creek	Upper Cretaceous	EPMA
1578	P013-01	W. Chance H-28	7	0.0636	0.245222	2.09831	2.54858	0.181622	0.45027	age	S. Eagle Plain	Burnthill/Cody Creek	Upper Cretaceous	EPMA
1579	P013-01	W. Chance H-28	8	0.0023	0.0410448	2.21812	1.88367	0.0387448	0.334455	age	S. Eagle Plain	Burnthill/Cody Creek	Upper Cretaceous	EPMA
1580	P013-01	W. Chance H-28	11	0.0415	0.229604	1.8587	2.49772	0.188104	0.639026	age	S. Eagle Plain	Burnthill/Cody Creek	Upper Cretaceous	EPMA
1581	P013-01	W. Chance H-28	12	0.0591	0.156109	2.07834	2.25838	0.0970093	0.180037	age	S. Eagle Plain	Burnthill/Cody Creek	Upper Cretaceous	EPMA
1582	P013-01	W. Chance H-28	14	0.004	0.00364202	1.8587	1.76186	0.000357982	0.0968355	age	S. Eagle Plain	Burnthill/Cody Creek	Upper Cretaceous	EPMA
1583	P013-01	W. Chance H-28	15	0.0074	0.0575341	1.74887	1.93736	0.0501341	0.188492	age	S. Eagle Plain	Burnthill/Cody Creek	Upper Cretaceous	EPMA
1584	P013-01	W. Chance H-28	16	0.0952	0.0986509	2.02842	2.07126	0.00345085	0.0428393	age	S. Eagle Plain	Burnthill/Cody Creek	Upper Cretaceous	EPMA
1585	P013-01	W. Chance H-28	17	0.0681	0.208573	2.21812	2.42923	0.140473	0.211111	age	S. Eagle Plain	Burnthill/Cody Creek	Upper Cretaceous	EPMA
1586	P013-01	W. Chance H-28	18	0.0067	0.0267731	1.7289	1.83719	0.0200731	0.108285	age	S. Eagle Plain	Burnthill/Cody Creek	Upper Cretaceous	EPMA
1587	P013-01	W. Chance H-28	19	0.0681	0.160985	2.08833	2.27426	0.0928852	0.185931	age	S. Eagle Plain	Burnthill/Cody Creek	Upper Cretaceous	EPMA
1588	P013-01	W. Chance H-28	20	0.2204	0.326866	2.61748	2.81446	0.106466	0.196981	age	S. Eagle Plain	Burnthill/Cody Creek	Upper Cretaceous	EPMA
1589	P013-01	W. Chance H-28	21	0.0145	-0.0119259	1.9186	1.71116	0.0264259	0.207438	age	S. Eagle Plain	Burnthill/Cody Creek	Upper Cretaceous	EPMA
1590	P013-01	W. Chance H-28	23	0.0043	-0.0563093	1.90862	1.56662	0.0606093	0.341991	age	S. Eagle Plain	Burnthill/Cody Creek	Upper Cretaceous	EPMA
1591	P013-01	W. Chance H-28	24	0.053	0.199901	1.89863	2.40099	0.146901	0.50236	age	S. Eagle Plain	Burnthill/Cody Creek	Upper Cretaceous	EPMA
1592	P013-01	W. Chance H-28	25	0.0412	0.181111	1.96852	2.3398	0.139911	0.371282	age	S. Eagle Plain	Burnthill/Cody Creek	Upper Cretaceous	EPMA
1593	P013-01	W. Chance H-28	27	0.0409	0.162804	1.90862	2.28018	0.121904	0.371567	age	S. Eagle Plain	Burnthill/Cody Creek	Upper Cretaceous	EPMA
1594	P013-01	W. Chance H-28	31	0.0663	0.174582	2.04839	2.31854	0.108282	0.270145	age	S. Eagle Plain	Burnthill/Cody Creek	Upper Cretaceous	EPMA
1595	P013-01	W. Chance H-28	32	0.0272	0.0745599	1.62906	1.99281	0.0473599	0.363745	age	S. Eagle Plain	Burnthill/Cody Creek	Upper Cretaceous	EPMA
1596	P013-01	W. Chance H-28	34	0	0.0344837	2.1083	1.8623	0.0344837	0.245997	age	S. Eagle Plain	Burnthill/Cody Creek	Upper Cretaceous	EPMA
1597	P013-01	W. Chance H-28	35	0.0835	0.147892	2.28801	2.23162	0.0643924	0.0563863	age	S. Eagle Plain	Burnthill/Cody Creek	Upper Cretaceous	EPMA
1598	P013-01	W. Chance H-28	36	0.3016	0.289969	2.03841	2.69431	0.0116306	0.655897	age	S. Eagle Plain	Burnthill/Cody Creek	Upper Cretaceous	EPMA
1599	P013-01	W. Chance H-28	37	0.0381	0.0938616	2.25806	2.05567	0.0557616	0.202389	age	S. Eagle Plain	Burnthill/Cody Creek	Upper Cretaceous	EPMA
1600	P013-01	W. Chance H-28	39	0.1702	0.166294	2.4178	2.29155	0.00390591	0.126252	age	S. Eagle Plain	Burnthill/Cody Creek	Upper Cretaceous	EPMA
1601	P013-01	W. Chance H-28	40	0.2505	0.239096	2.44775	2.52863	0.0114045	0.080879	age	S. Eagle Plain	Burnthill/Cody Creek	Upper Cretaceous	EPMA
1602	P013-01	W. Chance H-28	2	0.0081	-0.0737616	1.4793	1.50979	0.0818616	0.0304864	length	S. Eagle Plain	Burnthill/Cody Creek	Upper Cretaceous	EPMA
1603	P013-01	W. Chance H-28	3	0.0081	-0.0464466	1.75886	1.59874	0.0545466	0.160112	length	S. Eagle Plain	Burnthill/Cody Creek	Upper Cretaceous	EPMA
1604	P013-01	W. Chance H-28	7	0.0026	-0.0752166	1.69895	1.50505	0.0778166	0.1939	length	S. Eagle Plain	Burnthill/Cody Creek	Upper Cretaceous	EPMA
1605	P013-01	W. Chance H-28	10	0.0019	-0.0684626	1.78881	1.52705	0.0703626	0.261761	length	S. Eagle Plain	Burnthill/Cody Creek	Upper Cretaceous	EPMA
1606	P013-01	W. Chance H-28	12	0.0045	-0.0449996	2.79719	1.60346	0.0494996	1.19374	length	S. Eagle Plain	Burnthill/Cody Creek	Upper Cretaceous	EPMA
1607	P013-01	W. Chance H-28	13	0.0241	-0.0162413	2.01844	1.69711	0.0403413	0.321331	length	S. Eagle Plain	Burnthill/Cody Creek	Upper Cretaceous	EPMA
1608	P013-01	W. Chance H-28	14	0.0338	0.0315067	2.02842	1.8526	0.00229333	0.17582	length	S. Eagle Plain	Burnthill/Cody Creek	Upper Cretaceous	EPMA
1609	P013-01	W. Chance H-28	15	0.081	0.17277	2.06836	2.31264	0.0917702	0.244278	length	S. Eagle Plain	Burnthill/Cody Creek	Upper Cretaceous	EPMA
1610	P013-01	W. Chance H-28	16	0.0048	-0.0608142	2.28801	1.55195	0.0656142	0.736054	length	S. Eagle Plain	Burnthill/Cody Creek	Upper Cretaceous	EPMA
1611	P013-01	W. Chance H-28	17	0.5422	0.507121	2.75726	3.40147	0.035079	0.644218	length	S. Eagle Plain	Burnthill/Cody Creek	Upper Cretaceous	EPMA
1612	P013-01	W. Chance H-28	18	0.0154	-0.0432	1.84871	1.60932	0.0586	0.239396	length	S. Eagle Plain	Burnthill/Cody Creek	Upper Cretaceous	EPMA
1613	P013-01	W. Chance H-28	1	0.0028	0.0482468	2.96692	1.90712	0.0454468	1.0598	length	S. Eagle Plain	Burnthill/Cody Creek	Upper Cretaceous	EPMA
1614	P013-01	W. Chance H-28	3	0.0977	0.223086	2.04839	2.47649	0.125386	0.428102	length	S. Eagle Plain	Burnthill/Cody Creek	Upper Cretaceous	EPMA
1615	P013-01	W. Chance H-28	4	0.0447	0.177049	2.14823	2.32657	0.132349	0.17834	length	S. Eagle Plain	Burnthill/Cody Creek	Upper Cretaceous	EPMA
1616	P013-01	W. Chance H-28	6	0.0375	0.228891	1.93857	2.4954	0.191391	0.556832	length	S. Eagle Plain	Burnthill/Cody Creek	Upper Cretaceous	EPMA
1617	P013-01	W. Chance H-28	7	0.0642	0.158342	2.48769	2.26565	0.0941418	0.222037	length	S. Eagle Plain	Burnthill/Cody Creek	Upper Cretaceous	EPMA
1618	P013-01	W. Chance H-28	8	0.0073	0.0324757	2.07834	1.85576	0.0251757	0.222585	length	S. Eagle Plain	Burnthill/Cody Creek	Upper Cretaceous	EPMA
1619	P013-01	W. Chance H-28	9	0.1528	0.179098	2.61748	2.33324	0.0262978	0.284236	length	S. Eagle Plain	Burnthill/Cody Creek	Upper Cretaceous	EPMA
1620	P013-01	W. Chance H-28	10	0.0711	0.227149	2.55758	2.48973	0.156049	0.0678495	length	S. Eagle Plain	Burnthill/Cody Creek	Upper Cretaceous	EPMA
1621	P013-01	W. Chance H-28	11	0.2912	0.365961	2.69735	2.94178	0.0747605	0.244424	length	S. Eagle Plain	Burnthill/Cody Creek	Upper Cretaceous	EPMA
1622	P013-01	W. Chance H-28	12	0.0097	-0.0272295	2.08833	1.66133	0.0369295	0.427003	length	S. Eagle Plain	Burnthill/Cody Creek	Upper Cretaceous	EPMA
1623	P013-01	W. Chance H-28	13	0.006	0.00935732	1.78881	1.78047	0.00335732	0.00833523	length	S. Eagle Plain	Burnthill/Cody Creek	Upper Cretaceous	EPMA
1624	P013-01	W. Chance H-28	14	0.0935	0.153618	2.50766	2.25027	0.0601185	0.257387	length	S. Eagle Plain	Burnthill/Cody Creek	Upper Cretaceous	EPMA
1625	P013-01	W. Chance H-28	15	0.0057	0.0871228	3.53601	2.03372	0.0814228	1.50229	length	S. Eagle Plain	Burnthill/Cody Creek	Upper Cretaceous	EPMA
1626	P013-01	W. Chance H-28	16	0.0667	0.135042	2.24807	2.18977	0.0683418	0.0582991	length	S. Eagle Plain	Burnthill/Cody Creek	Upper Cretaceous	EPMA
1627	P013-01	W. Chance H-28	17	0	-0.0411524	2.01844	1.61598	0.0411524	0.402456	length	S. Eagle Plain	Burnthill/Cody Creek	Upper Cretaceous	EPMA
1628	P013-01	W. Chance H-28	18	0.0358	0.136981	1.96852	2.19609	0.101181	0.227569	length	S. Eagle Plain	Burnthill/Cody Creek	Upper Cretaceous	EPMA
1629	P013-01	W. Chance H-28	19	0.0649	0.200317	2.20814	2.40235	0.135417	0.19421	length	S. Eagle Plain	Burnthill/Cody Creek	Upper Cretaceous	EPMA
1630	P013-01	W. Chance H-28	20	0.1331	0.204178	2.42778	2.41492	0.0710777	0.0128652	length	S. Eagle Plain	Burnthill/Cody Creek	Upper Cretaceous	EPMA
1631	P013-01	W. Chance H-28	21	0.0534	0.162721	1.95854	2.27991	0.109321	0.321376	length	S. Eagle Plain	Burnthill/Cody Creek	Upper Cretaceous	EPMA
1632	P013-01	W. Chance H-28	22	0.018	-0.00181105	2.01844	1.7441	0.019811	0.274338	length	S. Eagle Plain	Burnthill/Cody Creek	Upper Cretaceous	EPMA
1633	P013-01	W. Chance H-28	23	0.1534	0.157484	2.14823	2.26286	0.0040843	0.114626	length	S. Eagle Plain	Burnthill/Cody Creek	Upper Cretaceous	EPMA
1634	P013-01	W. Chance H-28	24	0	0.0593268	2.36788	1.9432	0.0593268	0.424678	length	S. Eagle Plain	Burnthill/Cody Creek	Upper Cretaceous	EPMA
1635	P013-01	W. Chance H-28	26	0.0717	0.0364294	1.8587	1.86864	0.0352706	0.00993901	length	S. Eagle Plain	Burnthill/Cody Creek	Upper Cretaceous	EPMA
1636	P013-01	W. Chance H-28	27	0.0124	0.0497222	1.84871	1.91192	0.0373222	0.0632119	length	S. Eagle Plain	Burnthill/Cody Creek	Upper Cretaceous	EPMA
1637	P013-01	W. Chance H-28	28	0.0376	0.191729	1.96852	2.37438	0.154129	0.40586	length	S. Eagle Plain	Burnthill/Cody Creek	Upper Cretaceous	EPMA
1638	P013-01	W. Chance H-28	29	0.0731	0.19298	2.46772	2.37845	0.11988	0.0892686	length	S. Eagle Plain	Burnthill/Cody Creek	Upper Cretaceous	EPMA
1639	P013-01	W. Chance H-28	30	0.0936	0.16672	2.49767	2.29293	0.0731197	0.204738	length	S. Eagle Plain	Burnthill/Cody Creek	Upper Cretaceous	EPMA
1640	P013-01	W. Chance H-28	31	0.0202	0.00137851	2.08833	1.75449	0.0188215	0.333839	length	S. Eagle Plain	Burnthill/Cody Creek	Upper Cretaceous	EPMA
1641	P013-02	W. Chance H-28	1	0.0114	-0.0468318	2.26804	1.59749	0.0582318	0.670551	age	S. Eagle Plain	Fishing Brach	late Albian - Cenomanian	EPMA
1642	P013-02	W. Chance H-28	3	0.4298	0.294885	3.26644	2.71031	0.134915	0.556125	age	S. Eagle Plain	Fishing Brach	late Albian - Cenomanian	EPMA
1643	P013-02	W. Chance H-28	7	0.2295	0.32542	2.29799	2.80975	0.0959202	0.511761	age	S. Eagle Plain	Fishing Brach	late Albian - Cenomanian	EPMA
1644	P013-02	W. Chance H-28	8	0.0176	0.125308	2.19815	2.15807	0.107708	0.0400792	age	S. Eagle Plain	Fishing Brach	late Albian - Cenomanian	EPMA
1645	P013-02	W. Chance H-28	9	0.1194	0.279039	2.32794	2.65871	0.159639	0.330765	age	S. Eagle Plain	Fishing Brach	late Albian - Cenomanian	EPMA
1646	P013-02	W. Chance H-28	10	0.0057	-0.0368641	2.30798	1.62995	0.0425641	0.678026	age	S. Eagle Plain	Fishing Brach	late Albian - Cenomanian	EPMA
1647	P013-02	W. Chance H-28	12	0.0524	-0.00680721	2.01844	1.72783	0.0592072	0.290608	age	S. Eagle Plain	Fishing Brach	late Albian - Cenomanian	EPMA
1648	P013-02	W. Chance H-28	13	0.0744	0.219297	1.69895	2.46416	0.144897	0.765204	age	S. Eagle Plain	Fishing Brach	late Albian - Cenomanian	EPMA
1649	P013-02	W. Chance H-28	15	0.1625	0.317635	2.61748	2.7844	0.155135	0.16692	age	S. Eagle Plain	Fishing Brach	late Albian - Cenomanian	EPMA
1650	P013-02	W. Chance H-28	16	0.0032	0.132375	2.05838	2.18109	0.129175	0.122712	age	S. Eagle Plain	Fishing Brach	late Albian - Cenomanian	EPMA
1651	P013-02	W. Chance H-28	23	0.0456	0.0489886	2.00846	1.90953	0.00338861	0.0989212	age	S. Eagle Plain	Fishing Brach	late Albian - Cenomanian	EPMA
1652	P013-02	W. Chance H-28	24	0.0161	-0.0351215	1.88865	1.63562	0.0512215	0.253023	age	S. Eagle Plain	Fishing Brach	late Albian - Cenomanian	EPMA
1653	P013-02	W. Chance H-28	27	0.2736	0.422805	2.67738	3.12689	0.149205	0.44951	age	S. Eagle Plain	Fishing Brach	late Albian - Cenomanian	EPMA
1654	P013-02	W. Chance H-28	28	0.0031	0.0329114	2.38785	1.85718	0.0298114	0.53067	age	S. Eagle Plain	Fishing Brach	late Albian - Cenomanian	EPMA
1655	P013-02	W. Chance H-28	29	0.0042	0.0128143	2.24807	1.79173	0.00861427	0.456341	age	S. Eagle Plain	Fishing Brach	late Albian - Cenomanian	EPMA
1656	P013-02	W. Chance H-28	30	0.2212	0.118989	2.48769	2.13749	0.102211	0.350193	age	S. Eagle Plain	Fishing Brach	late Albian - Cenomanian	EPMA
1657	P013-02	W. Chance H-28	31	0.0041	-0.0503965	2.15822	1.58588	0.0544965	0.572336	age	S. Eagle Plain	Fishing Brach	late Albian - Cenomanian	EPMA
1658	P013-02	W. Chance H-28	32	0.0104	0.0360355	2.03841	1.86735	0.0256355	0.171056	age	S. Eagle Plain	Fishing Brach	late Albian - Cenomanian	EPMA
1659	P013-02	W. Chance H-28	33	0.0719	0.208241	2.23809	2.42815	0.136341	0.190064	age	S. Eagle Plain	Fishing Brach	late Albian - Cenomanian	EPMA
1660	P013-02	W. Chance H-28	34	0.1716	0.194684	2.06836	2.384	0.0230844	0.315643	age	S. Eagle Plain	Fishing Brach	late Albian - Cenomanian	EPMA
1661	P013-02	W. Chance H-28	36	0.0059	0.0816284	2.32794	2.01583	0.0757284	0.312116	age	S. Eagle Plain	Fishing Brach	late Albian - Cenomanian	EPMA
1662	P013-02	W. Chance H-28	37	0.2156	0.266651	2.31796	2.61837	0.051051	0.300407	age	S. Eagle Plain	Fishing Brach	late Albian - Cenomanian	EPMA
1663	P013-02	W. Chance H-28	40	0.0074	0.00154742	2.09831	1.75504	0.00585258	0.343273	age	S. Eagle Plain	Fishing Brach	late Albian - Cenomanian	EPMA
1664	P013-02	W. Chance H-28	1	0.0038	0.0811706	1.9785	2.01434	0.0773706	0.0358336	age	S. Eagle Plain	Fishing Brach	late Albian - Cenomanian	EPMA
1665	P013-02	W. Chance H-28	2	0.1144	0.131298	2.25806	2.17758	0.016898	0.080475	age	S. Eagle Plain	Fishing Brach	late Albian - Cenomanian	EPMA
1666	P013-02	W. Chance H-28	3	0.0038	-0.00958086	1.75886	1.7188	0.0133809	0.0400567	age	S. Eagle Plain	Fishing Brach	late Albian - Cenomanian	EPMA
1667	P013-02	W. Chance H-28	4	0.0151	0.0383819	1.67898	1.87499	0.0232819	0.196009	age	S. Eagle Plain	Fishing Brach	late Albian - Cenomanian	EPMA
1668	P013-02	W. Chance H-28	6	0	0.0742615	2.30798	1.99184	0.0742615	0.316138	age	S. Eagle Plain	Fishing Brach	late Albian - Cenomanian	EPMA
1669	P013-02	W. Chance H-28	10	0.0255	0.0801339	1.79879	2.01096	0.0546339	0.21217	age	S. Eagle Plain	Fishing Brach	late Albian - Cenomanian	EPMA
1670	P013-02	W. Chance H-28	11	0.0029	-0.00330733	1.73889	1.73923	0.00620733	0.000341451	age	S. Eagle Plain	Fishing Brach	late Albian - Cenomanian	EPMA
1671	P013-02	W. Chance H-28	16	0.0131	0.0310186	2.11	1.85101	0.0179186	0.258986	age	S. Eagle Plain	Fishing Brach	late Albian - Cenomanian	EPMA
1672	P013-02	W. Chance H-28	18	0.0669	0.143301	1.99847	2.21667	0.0764007	0.218197	age	S. Eagle Plain	Fishing Brach	late Albian - Cenomanian	EPMA
1673	P013-02	W. Chance H-28	1	0.0056	-0.0460703	2.03841	1.59997	0.0516703	0.438439	length	S. Eagle Plain	Fishing Brach	late Albian - Cenomanian	EPMA
1674	P013-02	W. Chance H-28	2	0.0012	-0.0300948	1.99847	1.65199	0.0312948	0.346478	length	S. Eagle Plain	Fishing Brach	late Albian - Cenomanian	EPMA
1675	P013-02	W. Chance H-28	4	0.0027	-0.0337224	1.96852	1.64018	0.0364224	0.328339	length	S. Eagle Plain	Fishing Brach	late Albian - Cenomanian	EPMA
1676	P013-02	W. Chance H-28	5	0.068	-0.00601713	1.83873	1.7304	0.0740171	0.108323	length	S. Eagle Plain	Fishing Brach	late Albian - Cenomanian	EPMA
1677	P013-02	W. Chance H-28	6	0.0037	0.104402	1.96852	2.08999	0.100702	0.121473	length	S. Eagle Plain	Fishing Brach	late Albian - Cenomanian	EPMA
1678	P013-02	W. Chance H-28	7	0.1581	0.320661	2.58753	2.79426	0.162561	0.206727	length	S. Eagle Plain	Fishing Brach	late Albian - Cenomanian	EPMA
1679	P013-02	W. Chance H-28	8	0.0193	0.122964	1.70894	2.15044	0.103664	0.441506	length	S. Eagle Plain	Fishing Brach	late Albian - Cenomanian	EPMA
1680	P013-02	W. Chance H-28	9	0.0578	0.225673	2.09831	2.48492	0.167873	0.386607	length	S. Eagle Plain	Fishing Brach	late Albian - Cenomanian	EPMA
1681	P013-02	W. Chance H-28	10	0.0404	0.0402932	2.12826	1.88122	0.000106794	0.247046	length	S. Eagle Plain	Fishing Brach	late Albian - Cenomanian	EPMA
1682	P013-02	W. Chance H-28	13	0.0029	-0.00925758	2.13825	1.71985	0.0121576	0.418396	length	S. Eagle Plain	Fishing Brach	late Albian - Cenomanian	EPMA
1683	P013-02	W. Chance H-28	14	0.2287	0.130586	2.31796	2.17526	0.0981142	0.142698	length	S. Eagle Plain	Fishing Brach	late Albian - Cenomanian	EPMA
1684	P013-02	W. Chance H-28	15	0.0029	0.01429	2.62746	1.79654	0.01139	0.830928	length	S. Eagle Plain	Fishing Brach	late Albian - Cenomanian	EPMA
1685	P013-02	W. Chance H-28	17	0.0111	0.0342905	2.19815	1.86167	0.0231905	0.336482	length	S. Eagle Plain	Fishing Brach	late Albian - Cenomanian	EPMA
1686	P013-02	W. Chance H-28	18	0.214	0.276207	2.02842	2.64949	0.0622069	0.621063	length	S. Eagle Plain	Fishing Brach	late Albian - Cenomanian	EPMA
1687	P013-02	W. Chance H-28	19	0.0027	-0.0108745	2.55758	1.71459	0.0135745	0.842989	length	S. Eagle Plain	Fishing Brach	late Albian - Cenomanian	EPMA
1688	P013-02	W. Chance H-28	21	0.0625	0.0669954	2.28801	1.96818	0.00449537	0.319833	length	S. Eagle Plain	Fishing Brach	late Albian - Cenomanian	EPMA
1689	P013-02	W. Chance H-28	1	0.0071	0.0922075	2.2281	2.05028	0.0851075	0.177824	length	S. Eagle Plain	Fishing Brach	late Albian - Cenomanian	EPMA
1690	P013-02	W. Chance H-28	3	0.0124	0.0525405	2.15822	1.9211	0.0401405	0.237114	length	S. Eagle Plain	Fishing Brach	late Albian - Cenomanian	EPMA
1691	P013-02	W. Chance H-28	4	0	0.0730808	2.63745	1.98799	0.0730808	0.649455	length	S. Eagle Plain	Fishing Brach	late Albian - Cenomanian	EPMA
1692	P013-02	W. Chance H-28	5	0.0686	0.11515	2.08833	2.12499	0.0465501	0.0366663	length	S. Eagle Plain	Fishing Brach	late Albian - Cenomanian	EPMA
1693	P013-02	W. Chance H-28	6	0	0.010914	1.84871	1.78554	0.010914	0.0631697	length	S. Eagle Plain	Fishing Brach	late Albian - Cenomanian	EPMA
1694	P013-02	W. Chance H-28	7	0.002	-0.0138261	1.669	1.70497	0.0158261	0.0359744	length	S. Eagle Plain	Fishing Brach	late Albian - Cenomanian	EPMA
1695	P013-02	W. Chance H-28	8	0.0175	0.0429484	1.98849	1.88986	0.0254484	0.0986236	length	S. Eagle Plain	Fishing Brach	late Albian - Cenomanian	EPMA
1696	P013-03	W. Chance H-28	4	0.002	-0.0315419	1.9785	1.64728	0.0335419	0.331223	age	S. Eagle Plain	Hart River	Carboniferous	EPMA
1697	P013-03	W. Chance H-28	3	0.0056	-0.0171588	1.9186	1.69412	0.0227588	0.224479	length	S. Eagle Plain	Hart River	Carboniferous	EPMA
1698	P013-04	W. Chance H-28	2	0.1395	0.297908	2.08833	2.72016	0.158408	0.631828	age	S. Eagle Plain	Imperial	Upper Devonian	EPMA
1699	P013-04	W. Chance H-28	3	0.0092	0.0170005	2.14823	1.80536	0.00780046	0.342869	age	S. Eagle Plain	Imperial	Upper Devonian	EPMA
1700	P013-04	W. Chance H-28	1	0.1477	0.264744	2.05838	2.61216	0.117044	0.55378	length	S. Eagle Plain	Imperial	Upper Devonian	EPMA
1701	P013-05	Ehnjuu Choo B-73	1	0.2065	0.3454	2.67738	2.87482	0.1389	0.197436	age	Eagle Plain, N. Yukon	Jungle Creek	Permian	EPMA
1702	P013-05	Ehnjuu Choo B-73	2	0.2881	0.380245	2.3579	2.98829	0.0921446	0.630397	age	Eagle Plain, N. Yukon	Jungle Creek	Permian	EPMA
1703	P013-05	Ehnjuu Choo B-73	3	0.0362	0.0204272	1.90862	1.81652	0.0157728	0.0920933	age	Eagle Plain, N. Yukon	Jungle Creek	Permian	EPMA
1704	P013-05	Ehnjuu Choo B-73	4	0.0046	0.0512711	1.74887	1.91697	0.0466711	0.168096	age	Eagle Plain, N. Yukon	Jungle Creek	Permian	EPMA
1705	P013-05	Ehnjuu Choo B-73	5	0.0032	-0.000514757	1.78881	1.74832	0.00371476	0.0404843	age	Eagle Plain, N. Yukon	Jungle Creek	Permian	EPMA
1706	P013-05	Ehnjuu Choo B-73	9	0.1087	0.0972328	2.18817	2.06665	0.0114672	0.121523	age	Eagle Plain, N. Yukon	Jungle Creek	Permian	EPMA
1707	P013-05	Ehnjuu Choo B-73	2	0.0336	0.0246762	2.05838	1.83036	0.00892377	0.228016	length	Eagle Plain, N. Yukon	Jungle Creek	Permian	EPMA
1708	P013-05	Ehnjuu Choo B-73	3	0.0035	-0.00800794	1.74887	1.72392	0.0115079	0.0249504	length	Eagle Plain, N. Yukon	Jungle Creek	Permian	EPMA
1709	P013-05	Ehnjuu Choo B-73	5	0.1359	0.094563	1.98849	2.05795	0.041337	0.069463	length	Eagle Plain, N. Yukon	Jungle Creek	Permian	EPMA
1710	P013-05	Ehnjuu Choo B-73	7	0.1112	0.116675	2.00846	2.12996	0.005475	0.121504	length	Eagle Plain, N. Yukon	Jungle Creek	Permian	EPMA
1711	P013-06	Ehnjuu Choo B-73	1	0.0183	0.030283	1.98849	1.84862	0.011983	0.139869	age	Eagle Plain, N. Yukon	Hart River	Carboniferous	EPMA
1712	P013-06	Ehnjuu Choo B-73	3	0.0222	-0.00409673	2.05838	1.73666	0.0262967	0.321717	age	Eagle Plain, N. Yukon	Hart River	Carboniferous	EPMA
1713	P013-06	Ehnjuu Choo B-73	5	0.1541	0.163954	1.8587	2.28393	0.00985416	0.425232	age	Eagle Plain, N. Yukon	Hart River	Carboniferous	EPMA
1714	P013-06	Ehnjuu Choo B-73	6	0.099	0.222441	1.96852	2.4744	0.123441	0.505876	age	Eagle Plain, N. Yukon	Hart River	Carboniferous	EPMA
1715	P013-06	Ehnjuu Choo B-73	7	0.002	-0.0778576	2.07834	1.49645	0.0798576	0.581893	age	Eagle Plain, N. Yukon	Hart River	Carboniferous	EPMA
1716	P013-06	Ehnjuu Choo B-73	8	0.0256	-0.00921791	1.87866	1.71998	0.0348179	0.158683	age	Eagle Plain, N. Yukon	Hart River	Carboniferous	EPMA
1717	P013-06	Ehnjuu Choo B-73	9	0.0108	-0.0536359	2.23809	1.57533	0.0644359	0.662757	age	Eagle Plain, N. Yukon	Hart River	Carboniferous	EPMA
1718	P013-06	Ehnjuu Choo B-73	10	0.0032	-0.0782077	2.46772	1.49531	0.0814077	0.972409	age	Eagle Plain, N. Yukon	Hart River	Carboniferous	EPMA
1719	P013-06	Ehnjuu Choo B-73	11	0.0401	0.121529	1.73889	2.14577	0.0814286	0.406878	age	Eagle Plain, N. Yukon	Hart River	Carboniferous	EPMA
1720	P013-06	Ehnjuu Choo B-73	12	0.0226	-0.0268037	1.82874	1.66271	0.0494037	0.166032	age	Eagle Plain, N. Yukon	Hart River	Carboniferous	EPMA
1721	P013-06	Ehnjuu Choo B-73	1	0.0167	0.0844777	1.68897	2.02511	0.0677777	0.336139	length	Eagle Plain, N. Yukon	Hart River	Carboniferous	EPMA
1722	P013-06	Ehnjuu Choo B-73	3	0.0218	-0.00289973	2.23809	1.74056	0.0246997	0.497531	length	Eagle Plain, N. Yukon	Hart River	Carboniferous	EPMA
1723	P013-06	Ehnjuu Choo B-73	4	0.0003	-0.0789088	1.93857	1.49303	0.0792088	0.44554	length	Eagle Plain, N. Yukon	Hart River	Carboniferous	EPMA
1724	P013-06	Ehnjuu Choo B-73	5	0.1419	0.192517	1.75886	2.37694	0.0506168	0.618088	length	Eagle Plain, N. Yukon	Hart River	Carboniferous	EPMA
1725	P013-06	Ehnjuu Choo B-73	6	0.099	0.210392	2.32794	2.43516	0.111392	0.107212	length	Eagle Plain, N. Yukon	Hart River	Carboniferous	EPMA
1726	P013-06	Ehnjuu Choo B-73	7	0.005	-0.0654217	1.99847	1.53695	0.0704217	0.461522	length	Eagle Plain, N. Yukon	Hart River	Carboniferous	EPMA
1727	P013-06	Ehnjuu Choo B-73	8	0.0081	-0.0183923	2.04839	1.6901	0.0264923	0.358288	length	Eagle Plain, N. Yukon	Hart River	Carboniferous	EPMA
1728	P013-06	Ehnjuu Choo B-73	9	0.046	0.149001	2.06836	2.23523	0.103001	0.166873	length	Eagle Plain, N. Yukon	Hart River	Carboniferous	EPMA
1729	P013-06	Ehnjuu Choo B-73	10	0.0169	-0.0116471	2.14823	1.71207	0.0285471	0.436162	length	Eagle Plain, N. Yukon	Hart River	Carboniferous	EPMA
1730	P013-07	Ehnjuu Choo B-73	1	0.0049	0.0485973	2.23809	1.90826	0.0436973	0.329828	age	Eagle Plain, N. Yukon	Hart River	Carboniferous	EPMA
1731	P013-07	Ehnjuu Choo B-73	2	0.0209	0.0526024	1.83873	1.9213	0.0317024	0.0825754	age	Eagle Plain, N. Yukon	Hart River	Carboniferous	EPMA
1732	P013-07	Ehnjuu Choo B-73	4	0.0284	0.0091985	1.88865	1.77996	0.0192015	0.108692	age	Eagle Plain, N. Yukon	Hart River	Carboniferous	EPMA
1733	P013-07	Ehnjuu Choo B-73	5	0.0419	0.213244	1.84871	2.44444	0.171344	0.595731	age	Eagle Plain, N. Yukon	Hart River	Carboniferous	EPMA
1734	P013-07	Ehnjuu Choo B-73	6	0.018	0.16248	2.57754	2.27913	0.14448	0.298417	age	Eagle Plain, N. Yukon	Hart River	Carboniferous	EPMA
1735	P013-07	Ehnjuu Choo B-73	9	0.0436	0.184932	1.8587	2.35225	0.141332	0.493549	age	Eagle Plain, N. Yukon	Hart River	Carboniferous	EPMA
1736	P013-07	Ehnjuu Choo B-73	12	0.044	0.19842	2.06836	2.39617	0.15442	0.327808	age	Eagle Plain, N. Yukon	Hart River	Carboniferous	EPMA
1737	P013-07	Ehnjuu Choo B-73	13	0.0044	0.0721364	2.18817	1.98492	0.0677364	0.203251	age	Eagle Plain, N. Yukon	Hart River	Carboniferous	EPMA
1738	P013-07	Ehnjuu Choo B-73	16	0.1205	0.244596	2.05838	2.54654	0.124096	0.488168	age	Eagle Plain, N. Yukon	Hart River	Carboniferous	EPMA
1739	P013-07	Ehnjuu Choo B-73	18	0.0038	0.0847262	1.84871	2.02592	0.0809262	0.177205	age	Eagle Plain, N. Yukon	Hart River	Carboniferous	EPMA
1740	P013-07	Ehnjuu Choo B-73	19	0.0242	0.105153	1.81876	2.09244	0.0809531	0.273678	age	Eagle Plain, N. Yukon	Hart River	Carboniferous	EPMA
1741	P013-07	Ehnjuu Choo B-73	21	0.0363	0.0218478	1.76884	1.82115	0.0144522	0.0523089	age	Eagle Plain, N. Yukon	Hart River	Carboniferous	EPMA
1742	P013-07	Ehnjuu Choo B-73	23	0	0.101569	2.04839	2.08077	0.101569	0.0323755	age	Eagle Plain, N. Yukon	Hart River	Carboniferous	EPMA
1743	P013-07	Ehnjuu Choo B-73	24	0.0682	0.241749	2.4178	2.53727	0.173549	0.119472	age	Eagle Plain, N. Yukon	Hart River	Carboniferous	EPMA
1744	P013-07	Ehnjuu Choo B-73	28	0.0647	0.174559	1.95854	2.31846	0.109859	0.359928	age	Eagle Plain, N. Yukon	Hart River	Carboniferous	EPMA
1745	P013-07	Ehnjuu Choo B-73	1	0.0197	0.0190024	1.92858	1.81188	0.000697576	0.116701	length	Eagle Plain, N. Yukon	Hart River	Carboniferous	EPMA
1746	P013-07	Ehnjuu Choo B-73	2	0.0153	0.15973	3.02682	2.27017	0.14443	0.756653	length	Eagle Plain, N. Yukon	Hart River	Carboniferous	EPMA
1747	P013-07	Ehnjuu Choo B-73	3	0.0254	0.0260841	1.98849	1.83494	0.00068415	0.153543	length	Eagle Plain, N. Yukon	Hart River	Carboniferous	EPMA
1748	P013-07	Ehnjuu Choo B-73	4	0.0021	0.135799	2.39783	2.19224	0.133699	0.205595	length	Eagle Plain, N. Yukon	Hart River	Carboniferous	EPMA
1749	P013-07	Ehnjuu Choo B-73	5	0.0633	0.260473	1.63905	2.59825	0.197173	0.959201	length	Eagle Plain, N. Yukon	Hart River	Carboniferous	EPMA
1750	P013-07	Ehnjuu Choo B-73	7	0.1035	0.0901617	2.3579	2.04362	0.0133383	0.314278	length	Eagle Plain, N. Yukon	Hart River	Carboniferous	EPMA
1751	P013-07	Ehnjuu Choo B-73	11	0.1214	0.244774	1.88865	2.54712	0.123374	0.658474	length	Eagle Plain, N. Yukon	Hart River	Carboniferous	EPMA
1752	P013-07	Ehnjuu Choo B-73	12	0.0354	0.0415739	1.88865	1.88539	0.00617391	0.0032597	length	Eagle Plain, N. Yukon	Hart River	Carboniferous	EPMA
1753	P013-07	Ehnjuu Choo B-73	13	0.0237	0.118298	1.9186	2.13525	0.0945984	0.216647	length	Eagle Plain, N. Yukon	Hart River	Carboniferous	EPMA
1754	P013-07	Ehnjuu Choo B-73	14	0.0549	0.242462	1.92858	2.5396	0.187562	0.611011	length	Eagle Plain, N. Yukon	Hart River	Carboniferous	EPMA
1755	P013-07	Ehnjuu Choo B-73	16	0.042	0.249363	1.94855	2.56207	0.207363	0.613515	length	Eagle Plain, N. Yukon	Hart River	Carboniferous	EPMA
1756	P013-09	Ehnjuu Choo B-73	2	0.0078	0.0252399	2.07834	1.8322	0.0174399	0.246149	age	Eagle Plain, N. Yukon	Imperial	Upper Devonian	EPMA
1757	P013-09	Ehnjuu Choo B-73	3	0.0135	0.083233	1.87866	2.02105	0.069733	0.14239	age	Eagle Plain, N. Yukon	Imperial	Upper Devonian	EPMA
1758	P013-09	Ehnjuu Choo B-73	4	0.0962	0.259271	2.17818	2.59433	0.163071	0.416149	age	Eagle Plain, N. Yukon	Imperial	Upper Devonian	EPMA
1759	P013-09	Ehnjuu Choo B-73	5	0.1691	0.195281	1.9785	2.38595	0.0261807	0.407441	age	Eagle Plain, N. Yukon	Imperial	Upper Devonian	EPMA
1760	P013-09	Ehnjuu Choo B-73	6	0.0102	-0.00349785	1.80878	1.73861	0.0136978	0.070167	age	Eagle Plain, N. Yukon	Imperial	Upper Devonian	EPMA
1761	P013-09	Ehnjuu Choo B-73	2	0.0067	0.00598278	1.94855	1.76948	0.000717216	0.179069	length	Eagle Plain, N. Yukon	Imperial	Upper Devonian	EPMA
1762	P013-09	Ehnjuu Choo B-73	3	0.0121	0.100128	2.03841	2.07607	0.0880282	0.0376664	length	Eagle Plain, N. Yukon	Imperial	Upper Devonian	EPMA
1763	P013-09	Ehnjuu Choo B-73	4	0.0959	0.282763	2.1083	2.67084	0.186863	0.56254	length	Eagle Plain, N. Yukon	Imperial	Upper Devonian	EPMA
1764	P013-09	Ehnjuu Choo B-73	5	0.036	0.174354	2.21812	2.31779	0.138354	0.0996743	length	Eagle Plain, N. Yukon	Imperial	Upper Devonian	EPMA
1765	P013-10	McParlon A-25	1	0.2878	0.253211	2.19815	2.5746	0.0345887	0.376448	age	Eagle Plain, N. Yukon	Cody Creek	Cenomanian - Turonian?	EPMA
1766	P013-10	McParlon A-25	4	0.1261	0.272669	2.31796	2.63797	0.146569	0.320007	age	Eagle Plain, N. Yukon	Cody Creek	Cenomanian - Turonian?	EPMA
1767	P013-10	McParlon A-25	7	0.0144	0.0338922	1.86868	1.86037	0.0194922	0.00830765	age	Eagle Plain, N. Yukon	Cody Creek	Cenomanian - Turonian?	EPMA
1768	P013-10	McParlon A-25	9	0.1818	0.194887	2.36788	2.38466	0.0130869	0.0167825	age	Eagle Plain, N. Yukon	Cody Creek	Cenomanian - Turonian?	EPMA
1769	P013-10	McParlon A-25	11	0.1016	0.16668	1.96852	2.2928	0.06508	0.324285	age	Eagle Plain, N. Yukon	Cody Creek	Cenomanian - Turonian?	EPMA
1770	P013-10	McParlon A-25	12	0.1523	0.221511	2.71732	2.47137	0.069211	0.245954	age	Eagle Plain, N. Yukon	Cody Creek	Cenomanian - Turonian?	EPMA
1771	P013-10	McParlon A-25	13	0.0044	0.099406	3.02682	2.07372	0.095006	0.953102	age	Eagle Plain, N. Yukon	Cody Creek	Cenomanian - Turonian?	EPMA
1772	P013-10	McParlon A-25	15	0.037	0.172498	2.1682	2.31175	0.135498	0.143553	age	Eagle Plain, N. Yukon	Cody Creek	Cenomanian - Turonian?	EPMA
1773	P013-10	McParlon A-25	16	0.0527	0.398936	1.98849	3.04916	0.346236	1.06067	age	Eagle Plain, N. Yukon	Cody Creek	Cenomanian - Turonian?	EPMA
1774	P013-10	McParlon A-25	17	0.0437	0.0723915	2.03841	1.98575	0.0286915	0.0526601	age	Eagle Plain, N. Yukon	Cody Creek	Cenomanian - Turonian?	EPMA
1775	P013-10	McParlon A-25	18	0.0029	-0.0778576	1.89863	1.49645	0.0807576	0.402181	age	Eagle Plain, N. Yukon	Cody Creek	Cenomanian - Turonian?	EPMA
1776	P013-10	McParlon A-25	19	0.027	0.0713703	1.8587	1.98242	0.0443703	0.123726	age	Eagle Plain, N. Yukon	Cody Creek	Cenomanian - Turonian?	EPMA
1777	P013-10	McParlon A-25	20	0.1836	0.206178	2.06836	2.42143	0.0225783	0.353074	age	Eagle Plain, N. Yukon	Cody Creek	Cenomanian - Turonian?	EPMA
1778	P013-10	McParlon A-25	21	0.0117	-0.0119517	1.90862	1.71108	0.0236517	0.197537	age	Eagle Plain, N. Yukon	Cody Creek	Cenomanian - Turonian?	EPMA
1779	P013-10	McParlon A-25	22	0.0003	0.00656908	2.15822	1.77139	0.00626908	0.386823	age	Eagle Plain, N. Yukon	Cody Creek	Cenomanian - Turonian?	EPMA
1780	P013-10	McParlon A-25	23	0.243	0.152892	2.00846	2.2479	0.0901085	0.239446	age	Eagle Plain, N. Yukon	Cody Creek	Cenomanian - Turonian?	EPMA
1781	P013-10	McParlon A-25	24	0.0744	0.170429	2.15822	2.30501	0.0960286	0.146796	age	Eagle Plain, N. Yukon	Cody Creek	Cenomanian - Turonian?	EPMA
1782	P013-10	McParlon A-25	25	0.0996	0.257375	2.06836	2.58816	0.157775	0.519798	age	Eagle Plain, N. Yukon	Cody Creek	Cenomanian - Turonian?	EPMA
1783	P013-10	McParlon A-25	26	0.0438	0.15973	2.31796	2.27017	0.11593	0.0477891	age	Eagle Plain, N. Yukon	Cody Creek	Cenomanian - Turonian?	EPMA
1784	P013-10	McParlon A-25	27	0.0362	0.017287	1.99847	1.8063	0.018913	0.192176	age	Eagle Plain, N. Yukon	Cody Creek	Cenomanian - Turonian?	EPMA
1785	P013-10	McParlon A-25	30	0.0009	-0.0424604	2.14823	1.61172	0.0433604	0.536507	age	Eagle Plain, N. Yukon	Cody Creek	Cenomanian - Turonian?	EPMA
1786	P013-10	McParlon A-25	31	0.0662	0.158029	1.88865	2.26463	0.0918294	0.375986	age	Eagle Plain, N. Yukon	Cody Creek	Cenomanian - Turonian?	EPMA
1787	P013-10	McParlon A-25	32	0.0461	0.119916	2.29799	2.14052	0.0738162	0.157477	age	Eagle Plain, N. Yukon	Cody Creek	Cenomanian - Turonian?	EPMA
1788	P013-10	McParlon A-25	33	0.0264	0.141565	2.27802	2.21102	0.115165	0.0670084	age	Eagle Plain, N. Yukon	Cody Creek	Cenomanian - Turonian?	EPMA
1789	P013-10	McParlon A-25	37	0.0421	0.169598	2.57754	2.30231	0.127498	0.275236	age	Eagle Plain, N. Yukon	Cody Creek	Cenomanian - Turonian?	EPMA
1790	P013-10	McParlon A-25	38	0.1077	0.162058	2.15822	2.27775	0.0543578	0.119536	age	Eagle Plain, N. Yukon	Cody Creek	Cenomanian - Turonian?	EPMA
1791	P013-10	McParlon A-25	39	0.0084	0.0979583	2.01844	2.06901	0.0895583	0.0505679	age	Eagle Plain, N. Yukon	Cody Creek	Cenomanian - Turonian?	EPMA
1792	P013-10	McParlon A-25	40	0.3168	0.27567	2.15822	2.64774	0.0411299	0.489523	age	Eagle Plain, N. Yukon	Cody Creek	Cenomanian - Turonian?	EPMA
1793	P013-10	McParlon A-25	1	0.0011	-0.0509826	1.84871	1.58397	0.0520826	0.26474	length	Eagle Plain, N. Yukon	Cody Creek	Cenomanian - Turonian?	EPMA
1794	P013-10	McParlon A-25	2	0.0625	0.113879	2.21812	2.12086	0.0513791	0.097265	length	Eagle Plain, N. Yukon	Cody Creek	Cenomanian - Turonian?	EPMA
1795	P013-10	McParlon A-25	3	0.0127	0.0161399	1.83873	1.80256	0.00343988	0.0361674	length	Eagle Plain, N. Yukon	Cody Creek	Cenomanian - Turonian?	EPMA
1796	P013-10	McParlon A-25	6	0.0043	0.00451386	1.79879	1.7647	0.000213861	0.0340923	length	Eagle Plain, N. Yukon	Cody Creek	Cenomanian - Turonian?	EPMA
1797	P013-10	McParlon A-25	8	0.0082	-0.00861254	1.88865	1.72195	0.0168125	0.166695	length	Eagle Plain, N. Yukon	Cody Creek	Cenomanian - Turonian?	EPMA
1798	P013-10	McParlon A-25	9	0.0011	-0.0620243	1.79879	1.54801	0.0631243	0.250779	length	Eagle Plain, N. Yukon	Cody Creek	Cenomanian - Turonian?	EPMA
1799	P013-10	McParlon A-25	10	0.0108	0.00156231	2.21812	1.75509	0.00923769	0.463032	length	Eagle Plain, N. Yukon	Cody Creek	Cenomanian - Turonian?	EPMA
1800	P013-10	McParlon A-25	11	0.0043	-0.0309074	1.87866	1.64935	0.0352074	0.229316	length	Eagle Plain, N. Yukon	Cody Creek	Cenomanian - Turonian?	EPMA
1801	P013-10	McParlon A-25	12	0.1858	0.237446	2.33793	2.52326	0.0516457	0.18533	length	Eagle Plain, N. Yukon	Cody Creek	Cenomanian - Turonian?	EPMA
1802	P013-10	McParlon A-25	13	0.147	0.232011	2.80718	2.50556	0.0850112	0.301616	length	Eagle Plain, N. Yukon	Cody Creek	Cenomanian - Turonian?	EPMA
1803	P013-10	McParlon A-25	14	0.0056	0.084229	3.30638	2.0243	0.078629	1.28208	length	Eagle Plain, N. Yukon	Cody Creek	Cenomanian - Turonian?	EPMA
1804	P013-10	McParlon A-25	16	0.0192	0.00568936	1.88865	1.76853	0.0135106	0.12012	length	Eagle Plain, N. Yukon	Cody Creek	Cenomanian - Turonian?	EPMA
1805	P013-10	McParlon A-25	17	0.0132	0.00890706	1.9186	1.77901	0.00429294	0.139594	length	Eagle Plain, N. Yukon	Cody Creek	Cenomanian - Turonian?	EPMA
1806	P013-10	McParlon A-25	18	0.0026	-0.0556356	1.70894	1.56882	0.0582356	0.140117	length	Eagle Plain, N. Yukon	Cody Creek	Cenomanian - Turonian?	EPMA
1807	P013-10	McParlon A-25	19	0.0126	0.00656908	2.01844	1.77139	0.00603092	0.247047	length	Eagle Plain, N. Yukon	Cody Creek	Cenomanian - Turonian?	EPMA
1808	P013-10	McParlon A-25	20	0.0026	-0.0747179	1.87866	1.50668	0.0773179	0.371988	length	Eagle Plain, N. Yukon	Cody Creek	Cenomanian - Turonian?	EPMA
1809	P013-10	McParlon A-25	22	0.2201	0.170221	2.09831	2.30434	0.0498789	0.206025	length	Eagle Plain, N. Yukon	Cody Creek	Cenomanian - Turonian?	EPMA
1810	P013-10	McParlon A-25	23	0.0023	-0.0398686	1.92858	1.62017	0.0421686	0.308419	length	Eagle Plain, N. Yukon	Cody Creek	Cenomanian - Turonian?	EPMA
1811	P013-10	McParlon A-25	24	0.029	0.15739	2.30798	2.26255	0.12839	0.045424	length	Eagle Plain, N. Yukon	Cody Creek	Cenomanian - Turonian?	EPMA
1812	P013-10	McParlon A-25	25	0.0377	0.0123926	1.9186	1.79036	0.0253074	0.128243	length	Eagle Plain, N. Yukon	Cody Creek	Cenomanian - Turonian?	EPMA
1813	P013-10	McParlon A-25	27	0	-0.0344078	1.8587	1.63795	0.0344078	0.220747	length	Eagle Plain, N. Yukon	Cody Creek	Cenomanian - Turonian?	EPMA
1814	P013-10	McParlon A-25	29	0.0417	0.102049	2.06836	2.08233	0.0603487	0.0139687	length	Eagle Plain, N. Yukon	Cody Creek	Cenomanian - Turonian?	EPMA
1815	P013-10	McParlon A-25	30	0.0006	-0.0252348	1.99847	1.66782	0.0258348	0.330651	length	Eagle Plain, N. Yukon	Cody Creek	Cenomanian - Turonian?	EPMA
1816	P013-10	McParlon A-25	31	0.1168	0.205023	2.05838	2.41767	0.0882226	0.359294	length	Eagle Plain, N. Yukon	Cody Creek	Cenomanian - Turonian?	EPMA
1817	P013-11	McParlon A-25	1	0.1853	0.294086	2.57754	2.70771	0.108786	0.130169	age	Eagle Plain, N. Yukon	Parkin	Albian	EPMA
1818	P013-11	McParlon A-25	3	0.0003	-0.0379341	1.92858	1.62647	0.0382341	0.302119	age	Eagle Plain, N. Yukon	Parkin	Albian	EPMA
1819	P013-11	McParlon A-25	4	0.1349	0.235098	2.29799	2.51561	0.100198	0.217622	age	Eagle Plain, N. Yukon	Parkin	Albian	EPMA
1820	P013-11	McParlon A-25	8	0.3059	0.255298	1.84871	2.58139	0.0506025	0.732682	age	Eagle Plain, N. Yukon	Parkin	Albian	EPMA
1821	P013-11	McParlon A-25	17	0.0155	0.0734105	2.44775	1.98907	0.0579105	0.458686	age	Eagle Plain, N. Yukon	Parkin	Albian	EPMA
1822	P013-11	McParlon A-25	1	0.0093	0.0633805	2.34791	1.9564	0.0540805	0.391509	length	Eagle Plain, N. Yukon	Parkin	Albian	EPMA
1823	P013-11	McParlon A-25	2	0.0057	0.0158527	1.73889	1.80163	0.0101527	0.0627373	length	Eagle Plain, N. Yukon	Parkin	Albian	EPMA
1824	P013-11	McParlon A-25	5	0.0028	-0.0778576	2.03841	1.49645	0.0806576	0.541957	length	Eagle Plain, N. Yukon	Parkin	Albian	EPMA
1825	P013-11	McParlon A-25	7	0.2947	0.231282	2.05838	2.50319	0.0634181	0.444809	length	Eagle Plain, N. Yukon	Parkin	Albian	EPMA
1826	P013-11	McParlon A-25	8	0.1345	0.226882	2.06836	2.48886	0.0923822	0.420498	length	Eagle Plain, N. Yukon	Parkin	Albian	EPMA
1827	P013-11	McParlon A-25	14	0.0158	0.246367	2.54759	2.55231	0.230567	0.00471965	length	Eagle Plain, N. Yukon	Parkin	Albian	EPMA
1828	P013-12	McParlon A-25	1	0.1079	0.181094	1.86	2.33975	0.0731944	0.479746	age	Eagle Plain, N. Yukon	Jungle Creek	Permian	EPMA
1829	P013-12	McParlon A-25	3	0.256	0.424388	2.21812	3.13205	0.168388	0.913927	age	Eagle Plain, N. Yukon	Jungle Creek	Permian	EPMA
1830	P013-12	McParlon A-25	4	0.0009	-0.0058979	1.90862	1.73079	0.0067979	0.177823	age	Eagle Plain, N. Yukon	Jungle Creek	Permian	EPMA
1831	P013-12	McParlon A-25	5	0.3215	0.401875	2.59751	3.05873	0.0803748	0.461221	age	Eagle Plain, N. Yukon	Jungle Creek	Permian	EPMA
1832	P013-12	McParlon A-25	6	0.0868	0.189537	2.45774	2.36724	0.102737	0.0904943	age	Eagle Plain, N. Yukon	Jungle Creek	Permian	EPMA
1833	P013-12	McParlon A-25	7	0.262	0.392094	2.52762	3.02688	0.130094	0.499257	age	Eagle Plain, N. Yukon	Jungle Creek	Permian	EPMA
1834	P013-12	McParlon A-25	11	0.1277	0.3559	2.42778	2.90901	0.2282	0.48123	age	Eagle Plain, N. Yukon	Jungle Creek	Permian	EPMA
1835	P013-12	McParlon A-25	17	0.3738	0.506403	2.28801	3.39914	0.132603	1.11113	age	Eagle Plain, N. Yukon	Jungle Creek	Permian	EPMA
1836	P013-12	McParlon A-25	20	0.1781	0.315038	2.7273	2.77594	0.136938	0.0486377	age	Eagle Plain, N. Yukon	Jungle Creek	Permian	EPMA
1837	P013-12	McParlon A-25	21	0.0022	0.0360997	2.1682	1.86756	0.0338997	0.300639	age	Eagle Plain, N. Yukon	Jungle Creek	Permian	EPMA
1838	P013-12	McParlon A-25	22	0.2229	0.349543	2.13825	2.88831	0.126643	0.750063	age	Eagle Plain, N. Yukon	Jungle Creek	Permian	EPMA
1839	P013-12	McParlon A-25	24	0.1295	0.269986	2.4178	2.62923	0.140486	0.211428	age	Eagle Plain, N. Yukon	Jungle Creek	Permian	EPMA
1840	P013-12	McParlon A-25	1	0.0638	0.228353	1.96852	2.49365	0.164553	0.525128	age	Eagle Plain, N. Yukon	Jungle Creek	Permian	EPMA
1841	P013-12	McParlon A-25	2	0.0026	0.00274513	1.9785	1.75894	0.000145132	0.219564	age	Eagle Plain, N. Yukon	Jungle Creek	Permian	EPMA
1842	P013-12	McParlon A-25	3	0.0886	0.165633	2.01844	2.2894	0.0770334	0.270957	age	Eagle Plain, N. Yukon	Jungle Creek	Permian	EPMA
1843	P013-12	McParlon A-25	4	0.1194	0.26133	2.06836	2.60104	0.14193	0.53268	age	Eagle Plain, N. Yukon	Jungle Creek	Permian	EPMA
1844	P013-12	McParlon A-25	5	0.0031	-0.00260095	1.67898	1.74153	0.00570095	0.0625458	age	Eagle Plain, N. Yukon	Jungle Creek	Permian	EPMA
1845	P013-12	McParlon A-25	7	0.0116	0.0618184	1.77882	1.95132	0.0502184	0.172492	age	Eagle Plain, N. Yukon	Jungle Creek	Permian	EPMA
1846	P013-12	McParlon A-25	8	0.0097	0.305303	1.98849	2.74424	0.295603	0.755751	age	Eagle Plain, N. Yukon	Jungle Creek	Permian	EPMA
1847	P013-12	McParlon A-25	10	0.0656	0.255644	2.37786	2.58252	0.190044	0.204659	age	Eagle Plain, N. Yukon	Jungle Creek	Permian	EPMA
1848	P013-12	McParlon A-25	11	0.2696	0.275836	2.05838	2.64828	0.00623627	0.589904	age	Eagle Plain, N. Yukon	Jungle Creek	Permian	EPMA
1849	P013-12	McParlon A-25	12	0.1228	0.311661	2.25806	2.76494	0.188861	0.506889	age	Eagle Plain, N. Yukon	Jungle Creek	Permian	EPMA
1850	P013-12	McParlon A-25	13	0.0733	0.289589	2.38785	2.69307	0.216289	0.305219	age	Eagle Plain, N. Yukon	Jungle Creek	Permian	EPMA
1851	P013-12	McParlon A-25	14	0.1717	0.356321	2.14823	2.91038	0.184621	0.762153	age	Eagle Plain, N. Yukon	Jungle Creek	Permian	EPMA
1852	P013-12	McParlon A-25	15	0.1155	0.228353	1.56916	2.49365	0.112853	0.924488	age	Eagle Plain, N. Yukon	Jungle Creek	Permian	EPMA
1853	P013-12	McParlon A-25	16	0.0045	0.134234	1.88865	2.18714	0.129734	0.298494	age	Eagle Plain, N. Yukon	Jungle Creek	Permian	EPMA
1854	P013-12	McParlon A-25	17	0.0637	0.219832	1.46932	2.4659	0.156132	0.996577	age	Eagle Plain, N. Yukon	Jungle Creek	Permian	EPMA
1855	P013-12	McParlon A-25	18	0.0291	0.121988	1.76884	2.14726	0.0928883	0.378423	age	Eagle Plain, N. Yukon	Jungle Creek	Permian	EPMA
1856	P013-12	McParlon A-25	19	0.1468	0.407824	2.2281	3.07811	0.261024	0.850003	age	Eagle Plain, N. Yukon	Jungle Creek	Permian	EPMA
1857	P013-12	McParlon A-25	20	0.0088	0.0480607	1.89863	1.90651	0.0392607	0.00788094	age	Eagle Plain, N. Yukon	Jungle Creek	Permian	EPMA
1858	P013-12	McParlon A-25	21	0.1052	0.306238	1.94855	2.74729	0.201038	0.798734	age	Eagle Plain, N. Yukon	Jungle Creek	Permian	EPMA
1859	P013-12	McParlon A-25	22	0.1179	0.123823	1.92858	2.15324	0.0059225	0.224653	age	Eagle Plain, N. Yukon	Jungle Creek	Permian	EPMA
1860	P013-12	McParlon A-25	23	0.0997	0.335689	1.83873	2.84319	0.235989	1.00447	age	Eagle Plain, N. Yukon	Jungle Creek	Permian	EPMA
1861	P013-12	McParlon A-25	24	0.1133	0.278487	2.13825	2.65691	0.165187	0.518663	age	Eagle Plain, N. Yukon	Jungle Creek	Permian	EPMA
1862	P013-12	McParlon A-25	25	0.0872	0.349685	2.19815	2.88877	0.262485	0.690622	age	Eagle Plain, N. Yukon	Jungle Creek	Permian	EPMA
1863	P013-12	McParlon A-25	26	0.0376	0.112475	1.81876	2.11628	0.0748749	0.297522	age	Eagle Plain, N. Yukon	Jungle Creek	Permian	EPMA
1864	P013-12	McParlon A-25	27	0.0053	0.0779692	1.9785	2.00391	0.0726692	0.0254081	age	Eagle Plain, N. Yukon	Jungle Creek	Permian	EPMA
1865	P013-12	McParlon A-25	28	0.092	0.217771	2.08833	2.45919	0.125771	0.370858	age	Eagle Plain, N. Yukon	Jungle Creek	Permian	EPMA
1866	P013-12	McParlon A-25	29	0.003	0.112943	1.89863	2.11781	0.109943	0.219176	age	Eagle Plain, N. Yukon	Jungle Creek	Permian	EPMA
1867	P013-12	McParlon A-25	31	0.0448	0.0426612	1.8587	1.88893	0.00213878	0.0302332	age	Eagle Plain, N. Yukon	Jungle Creek	Permian	EPMA
1868	P013-12	McParlon A-25	32	0.246	0.356602	2.05838	2.9113	0.110602	0.852921	age	Eagle Plain, N. Yukon	Jungle Creek	Permian	EPMA
1869	P013-12	McParlon A-25	33	0.0546	0.133786	1.6091	2.18568	0.079186	0.576587	age	Eagle Plain, N. Yukon	Jungle Creek	Permian	EPMA
1870	P013-12	McParlon A-25	35	0.114	0.291683	2.4777	2.69988	0.177683	0.22218	age	Eagle Plain, N. Yukon	Jungle Creek	Permian	EPMA
1871	P013-12	McParlon A-25	39	0.1118	0.249011	2.03841	2.56092	0.137211	0.522514	age	Eagle Plain, N. Yukon	Jungle Creek	Permian	EPMA
1872	P013-12	McParlon A-25	40	0.1401	0.291843	2.63745	2.70041	0.151743	0.0629594	age	Eagle Plain, N. Yukon	Jungle Creek	Permian	EPMA
1873	P013-12	McParlon A-25	2	0.2626	0.418767	2.50766	3.11374	0.156167	0.606086	length	Eagle Plain, N. Yukon	Jungle Creek	Permian	EPMA
1874	P013-12	McParlon A-25	3	0.1815	0.305303	2.38785	2.74424	0.123803	0.356391	length	Eagle Plain, N. Yukon	Jungle Creek	Permian	EPMA
1875	P013-12	McParlon A-25	4	0.127	0.326223	2.36788	2.81237	0.199223	0.444488	length	Eagle Plain, N. Yukon	Jungle Creek	Permian	EPMA
1876	P013-12	McParlon A-25	5	0.3301	0.405807	2.4178	3.07154	0.0757072	0.653739	length	Eagle Plain, N. Yukon	Jungle Creek	Permian	EPMA
1877	P013-12	McParlon A-25	6	0.0839	0.181905	2.05838	2.34239	0.098005	0.28401	length	Eagle Plain, N. Yukon	Jungle Creek	Permian	EPMA
1878	P013-12	McParlon A-25	11	0.1709	0.311815	2.53761	2.76545	0.140915	0.227838	length	Eagle Plain, N. Yukon	Jungle Creek	Permian	EPMA
1879	P013-12	McParlon A-25	12	0.2104	0.339481	2.6075	2.85554	0.129081	0.248048	length	Eagle Plain, N. Yukon	Jungle Creek	Permian	EPMA
1880	P013-12	McParlon A-25	13	0.149	0.344107	2.67738	2.87061	0.195107	0.193225	length	Eagle Plain, N. Yukon	Jungle Creek	Permian	EPMA
1881	P013-12	McParlon A-25	15	0.0065	-0.000812224	2.05838	1.74735	0.00731222	0.311021	length	Eagle Plain, N. Yukon	Jungle Creek	Permian	EPMA
1882	P013-12	McParlon A-25	1	0.0624	0.224297	1.9186	2.48044	0.161897	0.561838	length	Eagle Plain, N. Yukon	Jungle Creek	Permian	EPMA
1883	P013-12	McParlon A-25	2	0.0992	0.155895	2.04839	2.25768	0.0566954	0.209292	length	Eagle Plain, N. Yukon	Jungle Creek	Permian	EPMA
1884	P013-12	McParlon A-25	3	0.1156	0.264233	2.58753	2.61049	0.148633	0.0229657	length	Eagle Plain, N. Yukon	Jungle Creek	Permian	EPMA
1885	P013-12	McParlon A-25	4	0.0078	0.0869573	1.4194	2.03318	0.0791573	0.613783	length	Eagle Plain, N. Yukon	Jungle Creek	Permian	EPMA
1886	P013-12	McParlon A-25	6	0.073	0.285538	2.38785	2.67987	0.212538	0.292025	length	Eagle Plain, N. Yukon	Jungle Creek	Permian	EPMA
1887	P013-12	McParlon A-25	7	0.079	0.290073	2.46772	2.69464	0.211073	0.226923	length	Eagle Plain, N. Yukon	Jungle Creek	Permian	EPMA
1888	P013-12	McParlon A-25	8	0.2736	0.259615	2.15822	2.59545	0.0139855	0.437237	length	Eagle Plain, N. Yukon	Jungle Creek	Permian	EPMA
1889	P013-12	McParlon A-25	9	0.122	0.263722	2.2281	2.60883	0.141722	0.380726	length	Eagle Plain, N. Yukon	Jungle Creek	Permian	EPMA
1890	P013-12	McParlon A-25	10	0.0711	0.191724	1.9785	2.37436	0.120624	0.395859	length	Eagle Plain, N. Yukon	Jungle Creek	Permian	EPMA
1891	P013-12	McParlon A-25	11	0.0706	0.196657	2.11828	2.39043	0.126057	0.272146	length	Eagle Plain, N. Yukon	Jungle Creek	Permian	EPMA
1892	P013-12	McParlon A-25	12	0.0291	0.141565	1.86868	2.21102	0.112465	0.342336	length	Eagle Plain, N. Yukon	Jungle Creek	Permian	EPMA
1893	P013-12	McParlon A-25	13	0.111	0.270826	2.56756	2.63196	0.159826	0.0644044	length	Eagle Plain, N. Yukon	Jungle Creek	Permian	EPMA
1894	P013-12	McParlon A-25	14	0.0062	0.0272075	2.09831	1.8386	0.0210075	0.259709	length	Eagle Plain, N. Yukon	Jungle Creek	Permian	EPMA
1895	P013-12	McParlon A-25	15	0.0411	0.123594	2.14823	2.15249	0.0824936	0.0042591	length	Eagle Plain, N. Yukon	Jungle Creek	Permian	EPMA
1896	P013-12	McParlon A-25	16	0.096	0.22817	2.87706	2.49305	0.13217	0.384014	length	Eagle Plain, N. Yukon	Jungle Creek	Permian	EPMA
1897	P013-12	McParlon A-25	17	0.1091	0.260645	2.46772	2.59881	0.151545	0.131088	length	Eagle Plain, N. Yukon	Jungle Creek	Permian	EPMA
1898	P013-13	McParlon A-25	1	0.0594	0.186138	2.09831	2.35617	0.126738	0.257859	age	Eagle Plain, N. Yukon	Hart River	Carboniferous	EPMA
1899	P013-13	McParlon A-25	2	0.0633	0.135352	2.52762	2.19078	0.072052	0.336841	age	Eagle Plain, N. Yukon	Hart River	Carboniferous	EPMA
1900	P013-13	McParlon A-25	3	0.0591	0.230186	2.13825	2.49962	0.171086	0.361368	age	Eagle Plain, N. Yukon	Hart River	Carboniferous	EPMA
1901	P013-13	McParlon A-25	6	0.0733	0.0272075	2.15822	1.8386	0.0460925	0.319613	age	Eagle Plain, N. Yukon	Hart River	Carboniferous	EPMA
1902	P013-13	McParlon A-25	1	0.0547	0.150302	2.51764	2.23947	0.0956016	0.278173	length	Eagle Plain, N. Yukon	Hart River	Carboniferous	EPMA
1903	P013-13	McParlon A-25	4	0.0578	0.0432039	1.78881	1.8907	0.0145961	0.101889	length	Eagle Plain, N. Yukon	Hart River	Carboniferous	EPMA
1904	1354-13	Whitestone N-26	1	0.0996247	0.0392983	1.70894	1.87798	0.0603264	0.169042	age	Eagle Plain, N. Yukon	Hart River	Carboniferous	ICPMS
1905	1354-13	Whitestone N-26	2	0.287524	0.224239	1.92858	2.48025	0.0632857	0.551665	age	Eagle Plain, N. Yukon	Hart River	Carboniferous	ICPMS
1906	1354-13	Whitestone N-26	3	0.212357	0.167581	2.34791	2.29574	0.044776	0.0521726	age	Eagle Plain, N. Yukon	Hart River	Carboniferous	ICPMS
1907	1354-13	Whitestone N-26	4	0.0864696	0.072506	1.8587	1.98612	0.0139636	0.127425	age	Eagle Plain, N. Yukon	Hart River	Carboniferous	ICPMS
1908	1354-13	Whitestone N-26	5	0.0882916	0.222585	2.4777	2.47486	0.134294	0.00283975	age	Eagle Plain, N. Yukon	Hart River	Carboniferous	ICPMS
1909	1354-13	Whitestone N-26	7	0.200548	0.0934504	1.99847	2.05433	0.107097	0.0558557	age	Eagle Plain, N. Yukon	Hart River	Carboniferous	ICPMS
1910	1354-13	Whitestone N-26	8	0.141153	0.202972	2.00846	2.41099	0.0618186	0.402536	age	Eagle Plain, N. Yukon	Hart River	Carboniferous	ICPMS
1911	1354-13	Whitestone N-26	9	0.1013	0.117494	2.01844	2.13263	0.0161943	0.114187	age	Eagle Plain, N. Yukon	Hart River	Carboniferous	ICPMS
1912	1354-13	Whitestone N-26	10	0.228051	0.165074	2.25806	2.28757	0.0629775	0.0295177	age	Eagle Plain, N. Yukon	Hart River	Carboniferous	ICPMS
1913	1354-13	Whitestone N-26	11	0.37892	0.343046	2.76724	2.86715	0.0358732	0.0999141	age	Eagle Plain, N. Yukon	Hart River	Carboniferous	ICPMS
1914	1354-13	Whitestone N-26	12	0.0742675	0.0783837	2.39783	2.00526	0.0041162	0.39257	age	Eagle Plain, N. Yukon	Hart River	Carboniferous	ICPMS
1915	1354-13	Whitestone N-26	13	0.0588195	0.0671421	1.669	1.96865	0.00832268	0.299653	age	Eagle Plain, N. Yukon	Hart River	Carboniferous	ICPMS
1916	1354-13	Whitestone N-26	15	0.0598726	0.121963	2.25806	2.14718	0.0620909	0.110874	age	Eagle Plain, N. Yukon	Hart River	Carboniferous	ICPMS
1917	1354-13	Whitestone N-26	16	0.379698	0.259341	3.40622	2.59456	0.120357	0.811653	age	Eagle Plain, N. Yukon	Hart River	Carboniferous	ICPMS
1918	1354-13	Whitestone N-26	17	0.0841896	0.0863055	2.18817	2.03106	0.00211582	0.157108	age	Eagle Plain, N. Yukon	Hart River	Carboniferous	ICPMS
1919	1354-13	Whitestone N-26	18	0.00863511	-0.0470318	1.93857	1.59684	0.055667	0.34173	age	Eagle Plain, N. Yukon	Hart River	Carboniferous	ICPMS
1920	1354-13	Whitestone N-26	1	0.0982183	0.0946518	2.27802	2.05824	0.00356648	0.219784	length	Eagle Plain, N. Yukon	Hart River	Carboniferous	ICPMS
1921	1354-13	Whitestone N-26	2	0.127885	0.0977715	2.88705	2.0684	0.0301136	0.818649	length	Eagle Plain, N. Yukon	Hart River	Carboniferous	ICPMS
1922	1354-13	Whitestone N-26	4	0.0669176	-0.00363403	1.92858	1.73817	0.0705516	0.190418	length	Eagle Plain, N. Yukon	Hart River	Carboniferous	ICPMS
1923	1354-13	Whitestone N-26	5	0.257302	0.193412	2.93697	2.37986	0.06389	0.557108	length	Eagle Plain, N. Yukon	Hart River	Carboniferous	ICPMS
1924	1354-13	Whitestone N-26	6	0.0572381	0.113549	2.70734	2.11978	0.0563114	0.587554	length	Eagle Plain, N. Yukon	Hart River	Carboniferous	ICPMS
1925	1354-13	Whitestone N-26	8	0.155287	0.119297	2.39783	2.1385	0.0359909	0.259335	length	Eagle Plain, N. Yukon	Hart River	Carboniferous	ICPMS
1926	1354-08	1988LHA07-06	1	0.0405396	0.015047	2.2281	1.799	0.0254926	0.429102	age	Old Crow Basin	Dave Lord Syenite	Late Devonian (366.6±1.3 Ma)	ICPMS
1927	1354-08	1988LHA07-06	2	0.0989423	-0.00578272	1.81876	1.73117	0.104725	0.0875918	age	Old Crow Basin	Dave Lord Syenite	Late Devonian (366.6±1.3 Ma)	ICPMS
1928	1354-08	1988LHA07-06	3	0.0114953	0.0147793	2.24807	1.79813	0.00328402	0.449942	age	Old Crow Basin	Dave Lord Syenite	Late Devonian (366.6±1.3 Ma)	ICPMS
1929	1354-08	1988LHA07-06	4	0.03779	0.000417485	2.6674	1.75136	0.0373725	0.91604	age	Old Crow Basin	Dave Lord Syenite	Late Devonian (366.6±1.3 Ma)	ICPMS
1930	1354-08	1988LHA07-06	5	0.0574906	-0.0165251	2.70734	1.69619	0.0740156	1.01115	age	Old Crow Basin	Dave Lord Syenite	Late Devonian (366.6±1.3 Ma)	ICPMS
1931	1354-08	1988LHA07-06	6	0.104561	0.0619569	2.23809	1.95177	0.0426038	0.286321	age	Old Crow Basin	Dave Lord Syenite	Late Devonian (366.6±1.3 Ma)	ICPMS
1932	1354-08	1988LHA07-06	7	0.0328318	0.0870644	2.45774	2.03353	0.0542326	0.424205	age	Old Crow Basin	Dave Lord Syenite	Late Devonian (366.6±1.3 Ma)	ICPMS
1933	1354-08	1988LHA07-06	8	0.0115512	-0.0035173	2.51764	1.73855	0.0150685	0.779094	age	Old Crow Basin	Dave Lord Syenite	Late Devonian (366.6±1.3 Ma)	ICPMS
1934	1354-08	1988LHA07-06	9	0.00870834	-0.00972034	2.40782	1.71835	0.0184287	0.689471	age	Old Crow Basin	Dave Lord Syenite	Late Devonian (366.6±1.3 Ma)	ICPMS
1935	1354-08	1988LHA07-06	10	0.0495955	0.102468	2.44775	2.08369	0.052872	0.364059	age	Old Crow Basin	Dave Lord Syenite	Late Devonian (366.6±1.3 Ma)	ICPMS
1936	1354-08	1988LHA07-06	11	0.0150711	0.00129191	2.07834	1.75421	0.0137792	0.324137	age	Old Crow Basin	Dave Lord Syenite	Late Devonian (366.6±1.3 Ma)	ICPMS
1937	1354-08	1988LHA07-06	12	0.129952	0.0629213	2.18817	1.95491	0.067031	0.233261	age	Old Crow Basin	Dave Lord Syenite	Late Devonian (366.6±1.3 Ma)	ICPMS
1938	1354-08	1988LHA07-06	13	0.0197917	0.0361237	2.3579	1.86764	0.016332	0.490257	age	Old Crow Basin	Dave Lord Syenite	Late Devonian (366.6±1.3 Ma)	ICPMS
1939	1354-08	1988LHA07-06	14	0.0153659	0.0965636	2.80718	2.06447	0.0811977	0.74271	age	Old Crow Basin	Dave Lord Syenite	Late Devonian (366.6±1.3 Ma)	ICPMS
1940	1354-08	1988LHA07-06	15	0.0253831	-0.0421135	2.2281	1.61285	0.0674966	0.61525	age	Old Crow Basin	Dave Lord Syenite	Late Devonian (366.6±1.3 Ma)	ICPMS
1941	1354-08	1988LHA07-06	16	0	-0.0126565	2.42778	1.70878	0.0126565	0.719001	age	Old Crow Basin	Dave Lord Syenite	Late Devonian (366.6±1.3 Ma)	ICPMS
1942	1354-08	1988LHA07-06	17	0.00097477	0.0805166	2.1682	2.01221	0.0795419	0.155992	age	Old Crow Basin	Dave Lord Syenite	Late Devonian (366.6±1.3 Ma)	ICPMS
1943	1354-08	1988LHA07-06	18	0.000821972	-0.0431954	2.28801	1.60933	0.0440174	0.678677	age	Old Crow Basin	Dave Lord Syenite	Late Devonian (366.6±1.3 Ma)	ICPMS
1944	1354-08	1988LHA07-06	19	0.0363216	-0.0382176	2.71732	1.62554	0.0745393	1.09178	age	Old Crow Basin	Dave Lord Syenite	Late Devonian (366.6±1.3 Ma)	ICPMS
1945	1354-08	1988LHA07-06	20	0.0358329	0.036013	2.55758	1.86728	0.00018004	0.690297	age	Old Crow Basin	Dave Lord Syenite	Late Devonian (366.6±1.3 Ma)	ICPMS
1946	1354-08	1988LHA07-06	21	0	-0.0405285	2.28801	1.61802	0.0405285	0.669992	age	Old Crow Basin	Dave Lord Syenite	Late Devonian (366.6±1.3 Ma)	ICPMS
1947	1354-08	1988LHA07-06	22	0.022687	0.0223086	2.05838	1.82265	0.000378375	0.235727	age	Old Crow Basin	Dave Lord Syenite	Late Devonian (366.6±1.3 Ma)	ICPMS
1948	1354-08	1988LHA07-06	23	0.0103359	-0.000638184	2.57754	1.74792	0.0109741	0.829622	age	Old Crow Basin	Dave Lord Syenite	Late Devonian (366.6±1.3 Ma)	ICPMS
1949	1354-08	1988LHA07-06	24	0.0417903	-0.043419	2.45774	1.6086	0.0852093	0.849133	age	Old Crow Basin	Dave Lord Syenite	Late Devonian (366.6±1.3 Ma)	ICPMS
1950	1354-08	1988LHA07-06	25	0.0252202	0.0160141	2.52762	1.80215	0.00920615	0.725473	age	Old Crow Basin	Dave Lord Syenite	Late Devonian (366.6±1.3 Ma)	ICPMS
1951	1354-08	1988LHA07-06	26	0.0240096	0.00451386	2.32	1.7647	0.0194958	0.5553	age	Old Crow Basin	Dave Lord Syenite	Late Devonian (366.6±1.3 Ma)	ICPMS
1952	1354-08	1988LHA07-06	27	0.0441667	0.088439	2.68	2.03801	0.0442723	0.641992	age	Old Crow Basin	Dave Lord Syenite	Late Devonian (366.6±1.3 Ma)	ICPMS
1953	1354-08	1988LHA07-06	28	0.007826	-0.0105148	2.06836	1.71576	0.0183408	0.352602	age	Old Crow Basin	Dave Lord Syenite	Late Devonian (366.6±1.3 Ma)	ICPMS
1954	1354-08	1988LHA07-06	29	0.0301881	-0.0114466	2.63745	1.71272	0.0416347	0.924724	age	Old Crow Basin	Dave Lord Syenite	Late Devonian (366.6±1.3 Ma)	ICPMS
1955	1354-08	1988LHA07-06	30	0.0238351	0.0236054	2.53761	1.82687	0.000229716	0.710735	age	Old Crow Basin	Dave Lord Syenite	Late Devonian (366.6±1.3 Ma)	ICPMS
1956	1354-08	1988LHA07-06	31	0.0413106	-0.0349603	2.02842	1.63615	0.0762709	0.392275	age	Old Crow Basin	Dave Lord Syenite	Late Devonian (366.6±1.3 Ma)	ICPMS
1957	1354-08	1988LHA07-06	32	0.0151225	-0.0140368	2.15822	1.70429	0.0291593	0.453928	age	Old Crow Basin	Dave Lord Syenite	Late Devonian (366.6±1.3 Ma)	ICPMS
1958	1354-08	1988LHA07-06	33	0.0303996	0.0745739	2.26804	1.99285	0.0441742	0.275185	age	Old Crow Basin	Dave Lord Syenite	Late Devonian (366.6±1.3 Ma)	ICPMS
1959	1354-08	1988LHA07-06	34	0.0570636	0.0858823	2.48769	2.02968	0.0288186	0.458007	age	Old Crow Basin	Dave Lord Syenite	Late Devonian (366.6±1.3 Ma)	ICPMS
1960	1354-08	1988LHA07-06	35	0.017209	0.0714945	2.51764	1.98283	0.0542854	0.534813	age	Old Crow Basin	Dave Lord Syenite	Late Devonian (366.6±1.3 Ma)	ICPMS
1961	1354-08	1988LHA07-06	36	0	-0.015762	3.21652	1.69867	0.015762	1.51785	age	Old Crow Basin	Dave Lord Syenite	Late Devonian (366.6±1.3 Ma)	ICPMS
1962	1354-08	1988LHA07-06	37	0.0173043	0.085643	2.62746	2.0289	0.0683386	0.598562	age	Old Crow Basin	Dave Lord Syenite	Late Devonian (366.6±1.3 Ma)	ICPMS
1963	1354-08	1988LHA07-06	38	0.0209166	-0.0165072	2.33793	1.69624	0.0374239	0.641685	age	Old Crow Basin	Dave Lord Syenite	Late Devonian (366.6±1.3 Ma)	ICPMS
1964	1354-08	1988LHA07-06	39	0.0261622	0.0936404	1.9785	2.05495	0.0674782	0.0764424	age	Old Crow Basin	Dave Lord Syenite	Late Devonian (366.6±1.3 Ma)	ICPMS
1965	1354-08	1988LHA07-06	40	0.00610168	-0.0561519	2.1682	1.56714	0.0622536	0.601063	age	Old Crow Basin	Dave Lord Syenite	Late Devonian (366.6±1.3 Ma)	ICPMS
1966	1354-08	1988LHA07-06	3	0.0038	-0.00289973	2.24807	1.74056	0.00669973	0.507515	age	Old Crow Basin	Dave Lord Syenite	Late Devonian (366.6±1.3 Ma)	EPMA
1967	1354-08	1988LHA07-06	6	0.0025	-0.0334506	2.23809	1.64107	0.0359506	0.597022	age	Old Crow Basin	Dave Lord Syenite	Late Devonian (366.6±1.3 Ma)	EPMA
1968	1354-08	1988LHA07-06	9	0.0063	-0.0280626	2.40782	1.65861	0.0343626	0.749204	age	Old Crow Basin	Dave Lord Syenite	Late Devonian (366.6±1.3 Ma)	EPMA
1969	1354-08	1988LHA07-06	11	0	-0.0147012	2.07834	1.70212	0.0147012	0.37622	age	Old Crow Basin	Dave Lord Syenite	Late Devonian (366.6±1.3 Ma)	EPMA
1970	1354-08	1988LHA07-06	12	0.0049	-0.014395	2.18817	1.70312	0.019295	0.485046	age	Old Crow Basin	Dave Lord Syenite	Late Devonian (366.6±1.3 Ma)	EPMA
1971	1354-08	1988LHA07-06	13	0.0147	0.0380229	2.3579	1.87382	0.0233229	0.484072	age	Old Crow Basin	Dave Lord Syenite	Late Devonian (366.6±1.3 Ma)	EPMA
1972	1354-08	1988LHA07-06	15	0.0022	-0.0453931	2.2281	1.60217	0.0475931	0.62593	age	Old Crow Basin	Dave Lord Syenite	Late Devonian (366.6±1.3 Ma)	EPMA
1973	1354-08	1988LHA07-06	18	0.0035	-0.0131717	2.28801	1.70711	0.0166717	0.580903	age	Old Crow Basin	Dave Lord Syenite	Late Devonian (366.6±1.3 Ma)	EPMA
1974	1354-08	1988LHA07-06	19	0.0027	-0.0503215	2.71732	1.58612	0.0530215	1.1312	age	Old Crow Basin	Dave Lord Syenite	Late Devonian (366.6±1.3 Ma)	EPMA
1975	1354-08	1988LHA07-06	20	0.0076	0.00568936	2.55758	1.76853	0.00191064	0.789048	age	Old Crow Basin	Dave Lord Syenite	Late Devonian (366.6±1.3 Ma)	EPMA
1976	1354-08	1988LHA07-06	22	0.0069	-0.0187012	2.05838	1.6891	0.0256012	0.369278	age	Old Crow Basin	Dave Lord Syenite	Late Devonian (366.6±1.3 Ma)	EPMA
1977	1354-08	1988LHA07-06	23	0.0071	-0.00619876	2.57754	1.72981	0.0132988	0.847731	age	Old Crow Basin	Dave Lord Syenite	Late Devonian (366.6±1.3 Ma)	EPMA
1978	1354-08	1988LHA07-06	25	0.0032	-0.0137829	2.52762	1.70511	0.0169829	0.822509	age	Old Crow Basin	Dave Lord Syenite	Late Devonian (366.6±1.3 Ma)	EPMA
1979	1354-08	1988LHA07-06	26	0.0107	-0.00770593	2.32	1.72491	0.0184059	0.595095	age	Old Crow Basin	Dave Lord Syenite	Late Devonian (366.6±1.3 Ma)	EPMA
1980	1354-08	1988LHA07-06	31	0.0066	-0.0447398	2.02842	1.6043	0.0513398	0.424122	age	Old Crow Basin	Dave Lord Syenite	Late Devonian (366.6±1.3 Ma)	EPMA
1981	1354-08	1988LHA07-06	32	0.0051	-0.023671	2.15822	1.67291	0.028771	0.485302	age	Old Crow Basin	Dave Lord Syenite	Late Devonian (366.6±1.3 Ma)	EPMA
1982	1354-08	1988LHA07-06	36	0.0052	-0.037291	3.21652	1.62856	0.042491	1.58796	age	Old Crow Basin	Dave Lord Syenite	Late Devonian (366.6±1.3 Ma)	EPMA
1983	1354-08	1988LHA07-06	38	0.0031	-0.0211796	2.33793	1.68103	0.0242796	0.656901	age	Old Crow Basin	Dave Lord Syenite	Late Devonian (366.6±1.3 Ma)	EPMA
1984	1354-08	1988LHA07-06	40	0.0022	0.00333544	2.1682	1.76086	0.00113544	0.407338	age	Old Crow Basin	Dave Lord Syenite	Late Devonian (366.6±1.3 Ma)	EPMA
1985	1354-08	1988LHA07-06	1	0.00475976	0.00161649	2.42778	1.75526	0.00314327	0.67252	length	Old Crow Basin	Dave Lord Syenite	Late Devonian (366.6±1.3 Ma)	ICPMS
1986	1354-08	1988LHA07-06	2	0.0768312	0.1342	2.33793	2.18703	0.0573687	0.150897	length	Old Crow Basin	Dave Lord Syenite	Late Devonian (366.6±1.3 Ma)	ICPMS
1987	1354-08	1988LHA07-06	3	0.00985805	-0.0613437	2.43777	1.55023	0.0712018	0.887538	length	Old Crow Basin	Dave Lord Syenite	Late Devonian (366.6±1.3 Ma)	ICPMS
1988	1354-08	1988LHA07-06	5	0.00951843	0.0241946	1.94855	1.82879	0.0146762	0.119761	length	Old Crow Basin	Dave Lord Syenite	Late Devonian (366.6±1.3 Ma)	ICPMS
1989	1354-08	1988LHA07-06	6	0.026764	-0.0436856	2.25806	1.60773	0.0704497	0.650321	length	Old Crow Basin	Dave Lord Syenite	Late Devonian (366.6±1.3 Ma)	ICPMS
1990	1354-08	1988LHA07-06	7	0.0233176	-0.0436879	1.77882	1.60773	0.0670055	0.171097	length	Old Crow Basin	Dave Lord Syenite	Late Devonian (366.6±1.3 Ma)	ICPMS
1991	1354-08	1988LHA07-06	8	0	-0.0630654	1.87866	1.54462	0.0630654	0.334041	length	Old Crow Basin	Dave Lord Syenite	Late Devonian (366.6±1.3 Ma)	ICPMS
1992	1354-08	1988LHA07-06	9	0.0215852	-0.0526511	2.14823	1.57854	0.0742363	0.569694	length	Old Crow Basin	Dave Lord Syenite	Late Devonian (366.6±1.3 Ma)	ICPMS
1993	1354-08	1988LHA07-06	10	0.0457748	0.0241844	2.24807	1.82876	0.0215903	0.419314	length	Old Crow Basin	Dave Lord Syenite	Late Devonian (366.6±1.3 Ma)	ICPMS
1994	1354-08	1988LHA07-06	11	0.00735623	-0.0561409	2.40782	1.56717	0.0634971	0.840643	length	Old Crow Basin	Dave Lord Syenite	Late Devonian (366.6±1.3 Ma)	ICPMS
1995	1354-08	1988LHA07-06	13	0.00321366	-0.0396206	2.8571	1.62097	0.0428342	1.23612	length	Old Crow Basin	Dave Lord Syenite	Late Devonian (366.6±1.3 Ma)	ICPMS
[truncated: 933 more rows]
